# Supplementary material for: Identification of Key Gene Signatures Associated With Bone Metastasis in Castration-Resistant Prostate Cancer Using Co-Expression Analysis
Source: Front Oncol. 2021 Feb 2;10:571524. doi: 10.3389/fonc.2020.571524 (PMC7884857; doi:10.3389/fonc.2020.571524)
Supplement: Supplementary Table 2 — GO and KEGG enrichment analysis results for each module. [file Table_2.xlsx]

## Sheet: GO Enriched Terms
Module	ONTOLOGY	ID	Description	GeneRatio	BgRatio	pvalue	p.adjust	qvalue	geneID	Count
Yellow	BP	GO:0042098	T cell proliferation	9/60	178/18493	5.61326e-09	9.46956e-06	7.17315e-06	199/1794/2000/2534/3133/5788/29108/6850/7412	9
Yellow	BP	GO:0043312	neutrophil degranulation	12/60	485/18493	4.12588e-08	1.60534e-05	1.21604e-05	719/963/965/1520/1794/9535/11025/5788/29108/5873/6850/7133	12
Yellow	BP	GO:0002283	neutrophil activation involved in immune response	12/60	488/18493	4.41412e-08	1.60534e-05	1.21604e-05	719/963/965/1520/1794/9535/11025/5788/29108/5873/6850/7133	12
Yellow	BP	GO:0042119	neutrophil activation	12/60	498/18493	5.51005e-08	1.60534e-05	1.21604e-05	719/963/965/1520/1794/9535/11025/5788/29108/5873/6850/7133	12
Yellow	BP	GO:0002446	neutrophil mediated immunity	12/60	499/18493	5.63206e-08	1.60534e-05	1.21604e-05	719/963/965/1520/1794/9535/11025/5788/29108/5873/6850/7133	12
Yellow	BP	GO:0046633	alpha-beta T cell proliferation	5/60	32/18493	5.70957e-08	1.60534e-05	1.21604e-05	1794/2000/3133/5788/6850	5
Yellow	BP	GO:0046651	lymphocyte proliferation	9/60	264/18493	1.68252e-07	3.7824e-05	2.86515e-05	199/1794/2000/2534/3133/5788/29108/6850/7412	9
Yellow	BP	GO:0032943	mononuclear cell proliferation	9/60	266/18493	1.79367e-07	3.7824e-05	2.86515e-05	199/1794/2000/2534/3133/5788/29108/6850/7412	9
Yellow	BP	GO:0070661	leukocyte proliferation	9/60	283/18493	3.02709e-07	5.67411e-05	4.29811e-05	199/1794/2000/2534/3133/5788/29108/6850/7412	9
Yellow	BP	GO:1903039	positive regulation of leukocyte cell-cell adhesion	8/60	214/18493	4.3058e-07	7.26389e-05	5.50236e-05	199/2534/3133/3676/5788/29108/6850/7412	8
Yellow	BP	GO:0042102	positive regulation of T cell proliferation	6/60	97/18493	7.095e-07	0.000108811	8.24242e-05	199/3133/5788/29108/6850/7412	6
Yellow	BP	GO:0022409	positive regulation of cell-cell adhesion	8/60	251/18493	1.43326e-06	0.000201493	0.00015263	199/2534/3133/3676/5788/29108/6850/7412	8
Yellow	BP	GO:0042110	T cell activation	10/60	451/18493	1.70597e-06	0.000221382	0.000167696	199/1794/2000/2534/3133/5788/29108/5873/6850/7412	10
Yellow	BP	GO:0050870	positive regulation of T cell activation	7/60	202/18493	3.95571e-06	0.000448507	0.000339742	199/2534/3133/5788/29108/6850/7412	7
Yellow	BP	GO:0050671	positive regulation of lymphocyte proliferation	6/60	132/18493	4.30628e-06	0.000448507	0.000339742	199/3133/5788/29108/6850/7412	6
Yellow	BP	GO:0032946	positive regulation of mononuclear cell proliferation	6/60	133/18493	4.49845e-06	0.000448507	0.000339742	199/3133/5788/29108/6850/7412	6
Yellow	BP	GO:1903037	regulation of leukocyte cell-cell adhesion	8/60	293/18493	4.51964e-06	0.000448507	0.000339742	199/2534/3133/3676/5788/29108/6850/7412	8
Yellow	BP	GO:0070665	positive regulation of leukocyte proliferation	6/60	139/18493	5.80348e-06	0.0005373	0.000407002	199/3133/5788/29108/6850/7412	6
Yellow	BP	GO:0050764	regulation of phagocytosis	5/60	80/18493	6.05139e-06	0.0005373	0.000407002	1794/5788/29108/5873/6850	5
Yellow	BP	GO:0042129	regulation of T cell proliferation	6/60	153/18493	1.00675e-05	0.000810389	0.000613866	199/3133/5788/29108/6850/7412	6
Yellow	BP	GO:0007159	leukocyte cell-cell adhesion	8/60	327/18493	1.00878e-05	0.000810389	0.000613866	199/2534/3133/3676/5788/29108/6850/7412	8
Yellow	BP	GO:0006909	phagocytosis	8/60	342/18493	1.39603e-05	0.0010705	0.000810897	199/1794/2534/4688/5788/29108/5873/6850	8
Yellow	BP	GO:0001913	T cell mediated cytotoxicity	4/60	50/18493	2.06209e-05	0.0015125	0.00114571	3105/3133/5788/5873	4
Yellow	BP	GO:0050900	leukocyte migration	9/60	478/18493	2.19002e-05	0.0015394	0.00116609	199/719/965/7852/2534/3676/29108/6850/7412	9
Yellow	BP	GO:0071346	cellular response to interferon-gamma	6/60	178/18493	2.37808e-05	0.00160473	0.00121557	199/965/3105/3133/9111/7412	6
Yellow	BP	GO:0046641	positive regulation of alpha-beta T cell proliferation	3/60	19/18493	3.03202e-05	0.00196732	0.00149023	3133/5788/6850	3
Yellow	BP	GO:0022407	regulation of cell-cell adhesion	8/60	388/18493	3.44621e-05	0.0020952	0.0015871	199/2534/3133/3676/5788/29108/6850/7412	8
Yellow	BP	GO:0050766	positive regulation of phagocytosis	4/60	57/18493	3.47751e-05	0.0020952	0.0015871	1794/5788/29108/5873	4
Yellow	BP	GO:0045785	positive regulation of cell adhesion	8/60	397/18493	4.05409e-05	0.00235836	0.00178645	199/2534/3133/3676/5788/29108/6850/7412	8
Yellow	BP	GO:0034341	response to interferon-gamma	6/60	198/18493	4.32241e-05	0.00243063	0.00184119	199/965/3105/3133/9111/7412	6
Yellow	BP	GO:0050670	regulation of lymphocyte proliferation	6/60	205/18493	5.24558e-05	0.00284125	0.00215223	199/3133/5788/29108/6850/7412	6
Yellow	BP	GO:0032944	regulation of mononuclear cell proliferation	6/60	206/18493	5.38944e-05	0.00284125	0.00215223	199/3133/5788/29108/6850/7412	6
Yellow	BP	GO:0050863	regulation of T cell activation	7/60	305/18493	5.66093e-05	0.00289394	0.00219214	199/2534/3133/5788/29108/6850/7412	7
Yellow	BP	GO:0032677	regulation of interleukin-8 production	4/60	66/18493	6.20835e-05	0.00301752	0.00228576	965/5788/29108/7114	4
Yellow	BP	GO:2000482	regulation of interleukin-8 secretion	3/60	24/18493	6.26041e-05	0.00301752	0.00228576	965/29108/7114	3
Yellow	BP	GO:0070663	regulation of leukocyte proliferation	6/60	216/18493	7.00946e-05	0.00328471	0.00248815	199/3133/5788/29108/6850/7412	6
Yellow	BP	GO:0046631	alpha-beta T cell activation	5/60	134/18493	7.35248e-05	0.00335233	0.00253938	1794/2000/3133/5788/6850	5
Yellow	BP	GO:0001916	positive regulation of T cell mediated cytotoxicity	3/60	26/18493	8.00498e-05	0.00355379	0.00269198	3105/3133/5788	3
Yellow	BP	GO:0032637	interleukin-8 production	4/60	73/18493	9.21855e-05	0.00394627	0.00298928	965/5788/29108/7114	4
Yellow	BP	GO:0045807	positive regulation of endocytosis	5/60	141/18493	9.3569e-05	0.00394627	0.00298928	1794/5788/29108/5873/6850	5
Yellow	BP	GO:0051251	positive regulation of lymphocyte activation	7/60	333/18493	9.81438e-05	0.00403266	0.00305472	199/2534/3133/5788/29108/6850/7412	7
Yellow	BP	GO:0072606	interleukin-8 secretion	3/60	28/18493	0.000100398	0.00403266	0.00305472	965/29108/7114	3
Yellow	BP	GO:0071356	cellular response to tumor necrosis factor	6/60	235/18493	0.000111481	0.00428361	0.00324482	965/29108/6850/7114/7133/7412	6
Yellow	BP	GO:0046640	regulation of alpha-beta T cell proliferation	3/60	29/18493	0.000111724	0.00428361	0.00324482	3133/5788/6850	3
Yellow	BP	GO:2000406	positive regulation of T cell migration	3/60	30/18493	0.000123852	0.00464307	0.0035171	199/3676/29108	3
Yellow	BP	GO:0051249	regulation of lymphocyte activation	8/60	472/18493	0.000135522	0.00497014	0.00376486	199/2534/3133/5788/29108/64092/6850/7412	8
Yellow	BP	GO:0050714	positive regulation of protein secretion	6/60	246/18493	0.000143125	0.00513726	0.00389145	65985/965/3133/4023/29108/6850	6
Yellow	BP	GO:0002819	regulation of adaptive immune response	5/60	157/18493	0.000155082	0.00545048	0.00412871	3105/3133/5788/29108/64092	5
Yellow	BP	GO:0001914	regulation of T cell mediated cytotoxicity	3/60	33/18493	0.000165289	0.00569068	0.00431066	3105/3133/5788	3
Yellow	BP	GO:0034612	response to tumor necrosis factor	6/60	257/18493	0.000181512	0.0061242	0.00463906	965/29108/6850/7114/7133/7412	6
Yellow	BP	GO:0002696	positive regulation of leukocyte activation	7/60	372/18493	0.000194474	0.00641369	0.00485834	199/2534/3133/5788/29108/6850/7412	7
Yellow	BP	GO:1903532	positive regulation of secretion by cell	7/60	373/18493	0.000197695	0.00641369	0.00485834	65985/965/3133/4023/29108/5873/6850	7
Yellow	BP	GO:0060333	interferon-gamma-mediated signaling pathway	4/60	90/18493	0.000207709	0.00658894	0.00499109	3105/3133/9111/7412	4
Yellow	BP	GO:0002793	positive regulation of peptide secretion	6/60	265/18493	0.000214224	0.00658894	0.00499109	65985/965/3133/4023/29108/6850	6
Yellow	BP	GO:2000403	positive regulation of lymphocyte migration	3/60	36/18493	0.000214814	0.00658894	0.00499109	199/3676/29108	3
Yellow	BP	GO:0050867	positive regulation of cell activation	7/60	384/18493	0.000236073	0.00711171	0.00538708	199/2534/3133/5788/29108/6850/7412	7
Yellow	BP	GO:0019882	antigen processing and presentation	5/60	175/18493	0.000256943	0.0076046	0.00576045	1520/3105/3133/29108/5873	5
Yellow	BP	GO:0030041	actin filament polymerization	5/60	178/18493	0.000277941	0.00808426	0.00612379	199/9873/9535/29108/7114	5
Yellow	BP	GO:2000404	regulation of T cell migration	3/60	40/18493	0.000294521	0.00842131	0.00637911	199/3676/29108	3
Yellow	BP	GO:0043062	extracellular structure organization	7/60	402/18493	0.000311692	0.00862007	0.00652966	1520/3249/3676/3817/4023/7133/7412	7
Yellow	BP	GO:0051222	positive regulation of protein transport	7/60	402/18493	0.000311692	0.00862007	0.00652966	65985/965/2534/3133/4023/29108/6850	7
Yellow	BP	GO:0051047	positive regulation of secretion	7/60	404/18493	0.000321175	0.00867144	0.00656857	65985/965/3133/4023/29108/5873/6850	7
Yellow	BP	GO:0050707	regulation of cytokine secretion	5/60	184/18493	0.00032383	0.00867144	0.00656857	965/4023/29108/6850/7114	5
Yellow	BP	GO:0002456	T cell mediated immunity	4/60	102/18493	0.000335586	0.00884583	0.00670068	3105/3133/5788/5873	4
Yellow	BP	GO:0001909	leukocyte mediated cytotoxicity	4/60	105/18493	0.00037477	0.00957911	0.00725613	3105/3133/5788/5873	4
Yellow	BP	GO:0002821	positive regulation of adaptive immune response	4/60	105/18493	0.00037477	0.00957911	0.00725613	3105/3133/5788/29108	4
Yellow	BP	GO:0060326	cell chemotaxis	6/60	295/18493	0.000380439	0.00957911	0.00725613	199/719/7852/6850/7114/7412	6
Yellow	BP	GO:0001819	positive regulation of cytokine production	7/60	422/18493	0.00041742	0.0103557	0.00784439	719/965/3133/4023/5788/29108/6850	7
Yellow	BP	GO:0002711	positive regulation of T cell mediated immunity	3/60	46/18493	0.0004463	0.0109117	0.00826557	3105/3133/5788	3
Yellow	BP	GO:0031348	negative regulation of defense response	5/60	199/18493	0.000463681	0.0111747	0.00846478	3133/9111/5788/29108/7133	5
Yellow	BP	GO:0045058	T cell selection	3/60	48/18493	0.000506174	0.0118895	0.00900627	1794/5788/6850	3
Yellow	BP	GO:1904951	positive regulation of establishment of protein localization	7/60	437/18493	0.00051419	0.0118895	0.00900627	65985/965/2534/3133/4023/29108/6850	7
Yellow	BP	GO:0050708	regulation of protein secretion	7/60	438/18493	0.000521228	0.0118895	0.00900627	65985/965/3133/4023/29108/6850/7114	7
Yellow	BP	GO:0002697	regulation of immune effector process	7/60	439/18493	0.000528344	0.0118895	0.00900627	60489/719/3105/3133/5788/29108/6850	7
Yellow	BP	GO:0034656	nucleobase-containing small molecule catabolic process	3/60	49/18493	0.000537946	0.0118895	0.00900627	9582/60489/953	3
Yellow	BP	GO:0009615	response to virus	6/60	315/18493	0.000538181	0.0118895	0.00900627	9582/60489/665/7852/5788/29108	6
Yellow	BP	GO:0008154	actin polymerization or depolymerization	5/60	206/18493	0.000542676	0.0118895	0.00900627	199/9873/9535/29108/7114	5
Yellow	BP	GO:0045060	negative thymic T cell selection	2/60	11/18493	0.000558727	0.0120843	0.00915378	1794/5788	2
Yellow	BP	GO:0050663	cytokine secretion	5/60	210/18493	0.000592137	0.0126448	0.00957834	965/4023/29108/6850/7114	5
Yellow	BP	GO:0033209	tumor necrosis factor-mediated signaling pathway	4/60	119/18493	0.000601898	0.0126925	0.00961452	29108/6850/7114/7133	4
Yellow	BP	GO:0031638	zymogen activation	3/60	52/18493	0.000640836	0.0129739	0.00982765	3249/3817/29108	3
Yellow	BP	GO:0002687	positive regulation of leukocyte migration	4/60	121/18493	0.000640845	0.0129739	0.00982765	199/719/3676/29108	4
Yellow	BP	GO:0006216	cytidine catabolic process	2/60	12/18493	0.000669074	0.0129739	0.00982765	9582/60489	2
Yellow	BP	GO:0009972	cytidine deamination	2/60	12/18493	0.000669074	0.0129739	0.00982765	9582/60489	2
Yellow	BP	GO:0016554	cytidine to uridine editing	2/60	12/18493	0.000669074	0.0129739	0.00982765	9582/60489	2
Yellow	BP	GO:0043383	negative T cell selection	2/60	12/18493	0.000669074	0.0129739	0.00982765	1794/5788	2
Yellow	BP	GO:0046087	cytidine metabolic process	2/60	12/18493	0.000669074	0.0129739	0.00982765	9582/60489	2
Yellow	BP	GO:0050715	positive regulation of cytokine secretion	4/60	123/18493	0.000681548	0.0130656	0.00989712	965/4023/29108/6850	4
Yellow	BP	GO:0030183	B cell differentiation	4/60	125/18493	0.000724052	0.0137244	0.0103962	3676/5788/6850/7412	4
Yellow	BP	GO:0002791	regulation of peptide secretion	7/60	465/18493	0.000742361	0.0139151	0.0105407	65985/965/3133/4023/29108/6850/7114	7
Yellow	BP	GO:0001912	positive regulation of leukocyte mediated cytotoxicity	3/60	55/18493	0.000755505	0.0140059	0.0106094	3105/3133/5788	3
Yellow	BP	GO:0045059	positive thymic T cell selection	2/60	13/18493	0.000789074	0.0143136	0.0108425	1794/5788	2
Yellow	BP	GO:0090197	positive regulation of chemokine secretion	2/60	13/18493	0.000789074	0.0143136	0.0108425	4023/29108	2
Yellow	BP	GO:0051607	defense response to virus	5/60	228/18493	0.000857781	0.0150468	0.0113979	9582/60489/665/5788/29108	5
Yellow	BP	GO:0002705	positive regulation of leukocyte mediated immunity	4/60	131/18493	0.000862806	0.0150468	0.0113979	3105/3133/5788/6850	4
Yellow	BP	GO:0050777	negative regulation of immune response	4/60	131/18493	0.000862806	0.0150468	0.0113979	3133/9111/5788/64092	4
Yellow	BP	GO:0030198	extracellular matrix organization	6/60	348/18493	0.000905153	0.0150468	0.0113979	1520/3249/3676/3817/7133/7412	6
Yellow	BP	GO:0002483	antigen processing and presentation of endogenous peptide antigen	2/60	14/18493	0.000918666	0.0150468	0.0113979	3105/3133	2
Yellow	BP	GO:0032688	negative regulation of interferon-beta production	2/60	14/18493	0.000918666	0.0150468	0.0113979	9111/29108	2
Yellow	BP	GO:0043217	myelin maintenance	2/60	14/18493	0.000918666	0.0150468	0.0113979	7852/10397	2
Yellow	BP	GO:0046133	pyrimidine ribonucleoside catabolic process	2/60	14/18493	0.000918666	0.0150468	0.0113979	9582/60489	2
Yellow	BP	GO:0034113	heterotypic cell-cell adhesion	3/60	59/18493	0.000927605	0.0150468	0.0113979	965/3676/5788	3
Yellow	BP	GO:0072678	T cell migration	3/60	59/18493	0.000927605	0.0150468	0.0113979	199/3676/29108	3
Yellow	BP	GO:2000401	regulation of lymphocyte migration	3/60	59/18493	0.000927605	0.0150468	0.0113979	199/3676/29108	3
Yellow	BP	GO:0046635	positive regulation of alpha-beta T cell activation	3/60	61/18493	0.00102222	0.0163715	0.0124013	3133/5788/6850	3
Yellow	BP	GO:0001911	negative regulation of leukocyte mediated cytotoxicity	2/60	15/18493	0.00105779	0.0163715	0.0124013	3133/5788	2
Yellow	BP	GO:0046629	gamma-delta T cell activation	2/60	15/18493	0.00105779	0.0163715	0.0124013	5788/6850	2
Yellow	BP	GO:0090196	regulation of chemokine secretion	2/60	15/18493	0.00105779	0.0163715	0.0124013	4023/29108	2
Yellow	BP	GO:2000484	positive regulation of interleukin-8 secretion	2/60	15/18493	0.00105779	0.0163715	0.0124013	965/29108	2
Yellow	BP	GO:0048002	antigen processing and presentation of peptide antigen	4/60	139/18493	0.0010757	0.0164973	0.0124966	1520/3105/3133/29108	4
Yellow	BP	GO:0045088	regulation of innate immune response	6/60	365/18493	0.00115731	0.017589	0.0133236	1520/2534/3133/9111/29108/6850	6
Yellow	BP	GO:0031343	positive regulation of cell killing	3/60	64/18493	0.00117524	0.0177021	0.0134093	3105/3133/5788	3
Yellow	BP	GO:0051668	localization within membrane	4/60	143/18493	0.00119489	0.0178388	0.0135128	1794/3676/3800/5788	4
Yellow	BP	GO:0002475	antigen processing and presentation via MHC class Ib	2/60	16/18493	0.00120638	0.0178523	0.013523	3105/3133	2
Yellow	BP	GO:0002709	regulation of T cell mediated immunity	3/60	66/18493	0.00128486	0.0188484	0.0142775	3105/3133/5788	3
Yellow	BP	GO:0090195	chemokine secretion	2/60	17/18493	0.00136438	0.0198423	0.0150305	4023/29108	2
Yellow	BP	GO:0031342	negative regulation of cell killing	2/60	18/18493	0.00153173	0.0219752	0.0166461	3133/5788	2
Yellow	BP	GO:0030100	regulation of endocytosis	5/60	260/18493	0.00153709	0.0219752	0.0166461	1794/5788/29108/5873/6850	5
Yellow	BP	GO:0006907	pinocytosis	2/60	19/18493	0.00170837	0.0236548	0.0179184	1794/29108	2
Yellow	BP	GO:0060004	reflex	2/60	19/18493	0.00170837	0.0236548	0.0179184	26053/3249	2
Yellow	BP	GO:0032760	positive regulation of tumor necrosis factor production	3/60	73/18493	0.0017185	0.0236548	0.0179184	3133/5788/29108	3
Yellow	BP	GO:0001906	cell killing	4/60	158/18493	0.00172468	0.0236548	0.0179184	3105/3133/5788/5873	4
Yellow	BP	GO:0030833	regulation of actin filament polymerization	4/60	158/18493	0.00172468	0.0236548	0.0179184	9873/9535/29108/7114	4
Yellow	BP	GO:0016553	base conversion or substitution editing	2/60	20/18493	0.00189423	0.0255645	0.019365	9582/60489	2
Yellow	BP	GO:0031579	membrane raft organization	2/60	20/18493	0.00189423	0.0255645	0.019365	1794/5788	2
Yellow	BP	GO:0001910	regulation of leukocyte mediated cytotoxicity	3/60	76/18493	0.00192908	0.0256249	0.0194107	3105/3133/5788	3
Yellow	BP	GO:1903557	positive regulation of tumor necrosis factor superfamily cytokine production	3/60	76/18493	0.00192908	0.0256249	0.0194107	3133/5788/29108	3
Yellow	BP	GO:0051258	protein polymerization	5/60	275/18493	0.00196508	0.0258992	0.0196185	199/9873/9535/29108/7114	5
Yellow	BP	GO:0072593	reactive oxygen species metabolic process	5/60	276/18493	0.00199642	0.0261082	0.0197769	199/2534/4688/5873/6850	5
Yellow	BP	GO:0019883	antigen processing and presentation of endogenous antigen	2/60	21/18493	0.00208926	0.0267014	0.0202262	3105/3133	2
Yellow	BP	GO:0045061	thymic T cell selection	2/60	21/18493	0.00208926	0.0267014	0.0202262	1794/5788	2
Yellow	BP	GO:0071711	basement membrane organization	2/60	21/18493	0.00208926	0.0267014	0.0202262	1520/3249	2
Yellow	BP	GO:0042116	macrophage activation	3/60	80/18493	0.00223393	0.0283356	0.0214641	199/5788/6850	3
Yellow	BP	GO:0035584	calcium-mediated signaling using intracellular calcium source	2/60	22/18493	0.0022934	0.028659	0.0217091	5788/7412	2
Yellow	BP	GO:0042454	ribonucleoside catabolic process	2/60	22/18493	0.0022934	0.028659	0.0217091	9582/60489	2
Yellow	BP	GO:0007009	plasma membrane organization	3/60	83/18493	0.00248111	0.0302044	0.0228797	7852/10397/5788	3
Yellow	BP	GO:0050727	regulation of inflammatory response	6/60	425/18493	0.00249777	0.0302044	0.0228797	719/4023/5788/29108/7114/7133	6
Yellow	BP	GO:0010529	negative regulation of transposition	2/60	23/18493	0.00250659	0.0302044	0.0228797	9582/60489	2
Yellow	BP	GO:0032753	positive regulation of interleukin-4 production	2/60	23/18493	0.00250659	0.0302044	0.0228797	3133/6850	2
Yellow	BP	GO:0071404	cellular response to low-density lipoprotein particle stimulus	2/60	23/18493	0.00250659	0.0302044	0.0228797	4023/6850	2
Yellow	BP	GO:0031349	positive regulation of defense response	6/60	427/18493	0.00255678	0.0305907	0.0231723	1520/2534/3133/4023/29108/6850	6
Yellow	BP	GO:0030101	natural killer cell activation	3/60	85/18493	0.00265493	0.0313734	0.0237652	2000/5788/5873	3
Yellow	BP	GO:0008064	regulation of actin polymerization or depolymerization	4/60	178/18493	0.00265939	0.0313734	0.0237652	9873/9535/29108/7114	4
Yellow	BP	GO:0030832	regulation of actin filament length	4/60	179/18493	0.00271366	0.0314758	0.0238427	9873/9535/29108/7114	4
Yellow	BP	GO:0010528	regulation of transposition	2/60	24/18493	0.00272877	0.0314758	0.0238427	9582/60489	2
Yellow	BP	GO:0046135	pyrimidine nucleoside catabolic process	2/60	24/18493	0.00272877	0.0314758	0.0238427	9582/60489	2
Yellow	BP	GO:0032103	positive regulation of response to external stimulus	5/60	297/18493	0.0027427	0.0314758	0.0238427	199/719/4023/9450/7114	5
Yellow	BP	GO:0002685	regulation of leukocyte migration	4/60	180/18493	0.00276868	0.0315593	0.023906	199/719/3676/29108	4
Yellow	BP	GO:0031341	regulation of cell killing	3/60	88/18493	0.00292948	0.0330684	0.0250492	3105/3133/5788	3
Yellow	BP	GO:0002230	positive regulation of defense response to virus by host	2/60	25/18493	0.00295989	0.0330684	0.0250492	60489/29108	2
Yellow	BP	GO:0050901	leukocyte tethering or rolling	2/60	25/18493	0.00295989	0.0330684	0.0250492	3676/7412	2
Yellow	BP	GO:0042113	B cell activation	5/60	303/18493	0.00298879	0.0331716	0.0251274	3676/5788/64092/6850/7412	5
Yellow	BP	GO:2000377	regulation of reactive oxygen species metabolic process	4/60	185/18493	0.00305533	0.0336885	0.0255189	199/2534/5873/6850	4
Yellow	BP	GO:0002479	antigen processing and presentation of exogenous peptide antigen via MHC class I, TAP-dependent	2/60	26/18493	0.00319987	0.0345655	0.0261832	3105/3133	2
Yellow	BP	GO:0050974	detection of mechanical stimulus involved in sensory perception	2/60	26/18493	0.00319987	0.0345655	0.0261832	2534/3249	2
Yellow	BP	GO:0080111	DNA demethylation	2/60	26/18493	0.00319987	0.0345655	0.0261832	9582/60489	2
Yellow	BP	GO:0046634	regulation of alpha-beta T cell activation	3/60	91/18493	0.00322091	0.0345655	0.0261832	3133/5788/6850	3
Yellow	BP	GO:0045089	positive regulation of innate immune response	5/60	309/18493	0.00325051	0.0345655	0.0261832	1520/2534/3133/29108/6850	5
Yellow	BP	GO:0007409	axonogenesis	6/60	449/18493	0.00327748	0.0345655	0.0261832	26053/7852/2534/3676/3800/10154	6
Yellow	BP	GO:0016485	protein processing	5/60	310/18493	0.00329568	0.0345655	0.0261832	719/1520/3249/3817/29108	5
Yellow	BP	GO:1901136	carbohydrate derivative catabolic process	4/60	189/18493	0.00329878	0.0345655	0.0261832	9582/60489/80896/5152	4
Yellow	BP	GO:0032673	regulation of interleukin-4 production	2/60	27/18493	0.00344867	0.0352601	0.0267094	3133/6850	2
Yellow	BP	GO:0045577	regulation of B cell differentiation	2/60	27/18493	0.00344867	0.0352601	0.0267094	5788/6850	2
Yellow	BP	GO:0060384	innervation	2/60	27/18493	0.00344867	0.0352601	0.0267094	3676/7412	2
Yellow	BP	GO:0097066	response to thyroid hormone	2/60	27/18493	0.00344867	0.0352601	0.0267094	1520/3249	2
Yellow	BP	GO:0042035	regulation of cytokine biosynthetic process	3/60	94/18493	0.00352954	0.0356547	0.0270083	9111/5788/6850	3
Yellow	BP	GO:1903426	regulation of reactive oxygen species biosynthetic process	3/60	94/18493	0.00352954	0.0356547	0.0270083	199/2534/5873	3
Yellow	BP	GO:0032196	transposition	2/60	28/18493	0.00370623	0.0370562	0.0280699	9582/60489	2
Yellow	BP	GO:0031532	actin cytoskeleton reorganization	3/60	96/18493	0.00374502	0.0370562	0.0280699	397/26053/9535	3
Yellow	BP	GO:0032414	positive regulation of ion transmembrane transporter activity	3/60	96/18493	0.00374502	0.0370562	0.0280699	1520/2745/7114	3
Yellow	BP	GO:0002703	regulation of leukocyte mediated immunity	4/60	196/18493	0.00375614	0.0370562	0.0280699	3105/3133/5788/6850	4
Yellow	BP	GO:0042036	negative regulation of cytokine biosynthetic process	2/60	29/18493	0.00397249	0.0387376	0.0293435	9111/5788	2
Yellow	BP	GO:0050690	regulation of defense response to virus by virus	2/60	29/18493	0.00397249	0.0387376	0.0293435	1794/2534	2
Yellow	BP	GO:0002824	positive regulation of adaptive immune response based on somatic recombination of immune receptors built from immunoglobulin superfamily domains	3/60	100/18493	0.00419967	0.0407123	0.0308394	3105/3133/5788	3
Yellow	BP	GO:0001773	myeloid dendritic cell activation	2/60	30/18493	0.0042474	0.0407123	0.0308394	1794/29108	2
Yellow	BP	GO:0042590	antigen processing and presentation of exogenous peptide antigen via MHC class I	2/60	30/18493	0.0042474	0.0407123	0.0308394	3105/3133	2
Yellow	BP	GO:0032956	regulation of actin cytoskeleton organization	5/60	331/18493	0.00435282	0.041487	0.0314262	397/9873/9535/29108/7114	5
Yellow	BP	GO:0042554	superoxide anion generation	2/60	31/18493	0.00453089	0.0427017	0.0323463	4688/6850	2
Yellow	BP	GO:0055094	response to lipoprotein particle	2/60	31/18493	0.00453089	0.0427017	0.0323463	4023/6850	2
Yellow	BP	GO:0032271	regulation of protein polymerization	4/60	208/18493	0.00463727	0.0434615	0.0329219	9873/9535/29108/7114	4
Yellow	BP	GO:0032411	positive regulation of transporter activity	3/60	104/18493	0.00468651	0.0435093	0.0329581	1520/2745/7114	3
Yellow	BP	GO:0002699	positive regulation of immune effector process	4/60	209/18493	0.00471645	0.0435093	0.0329581	3105/3133/5788/6850	4
Yellow	BP	GO:0050920	regulation of chemotaxis	4/60	210/18493	0.00479653	0.0435093	0.0329581	199/719/7852/7114	4
Yellow	BP	GO:0002708	positive regulation of lymphocyte mediated immunity	3/60	105/18493	0.00481333	0.0435093	0.0329581	3105/3133/5788	3
Yellow	BP	GO:0042089	cytokine biosynthetic process	3/60	105/18493	0.00481333	0.0435093	0.0329581	9111/5788/6850	3
Yellow	BP	GO:0072676	lymphocyte migration	3/60	105/18493	0.00481333	0.0435093	0.0329581	199/3676/29108	3
Yellow	BP	GO:0035510	DNA dealkylation	2/60	32/18493	0.0048229	0.0435093	0.0329581	9582/60489	2
Yellow	BP	GO:0042107	cytokine metabolic process	3/60	106/18493	0.00494221	0.0440978	0.0334039	9111/5788/6850	3
Yellow	BP	GO:0043502	regulation of muscle adaptation	3/60	106/18493	0.00494221	0.0440978	0.0334039	199/5152/7133	3
Yellow	BP	GO:0030098	lymphocyte differentiation	5/60	344/18493	0.00511757	0.0440978	0.0334039	1794/3676/5788/6850/7412	5
Yellow	BP	GO:0001774	microglial cell activation	2/60	33/18493	0.0051234	0.0440978	0.0334039	199/5788	2
Yellow	BP	GO:0002269	leukocyte activation involved in inflammatory response	2/60	33/18493	0.0051234	0.0440978	0.0334039	199/5788	2
Yellow	BP	GO:0009164	nucleoside catabolic process	2/60	33/18493	0.0051234	0.0440978	0.0334039	9582/60489	2
Yellow	BP	GO:0016601	Rac protein signal transduction	2/60	33/18493	0.0051234	0.0440978	0.0334039	199/26053	2
Yellow	BP	GO:0032633	interleukin-4 production	2/60	33/18493	0.0051234	0.0440978	0.0334039	3133/6850	2
Yellow	BP	GO:0071402	cellular response to lipoprotein particle stimulus	2/60	33/18493	0.0051234	0.0440978	0.0334039	4023/6850	2
Yellow	BP	GO:0061564	axon development	6/60	493/18493	0.00516235	0.0442075	0.033487	26053/7852/2534/3676/3800/10154	6
Yellow	BP	GO:0030595	leukocyte chemotaxis	4/60	217/18493	0.00538291	0.0458635	0.0347414	199/719/7852/6850	4
Yellow	BP	GO:2000249	regulation of actin cytoskeleton reorganization	2/60	34/18493	0.0054323	0.0460517	0.034884	397/9535	2
Yellow	BP	GO:0019722	calcium-mediated signaling	4/60	220/18493	0.00564829	0.0476433	0.0360896	7852/5788/6850/7412	4
Yellow	BP	GO:0002707	negative regulation of lymphocyte mediated immunity	2/60	35/18493	0.00574957	0.0480175	0.036373	3133/5788	2
Yellow	BP	GO:0043368	positive T cell selection	2/60	35/18493	0.00574957	0.0480175	0.036373	1794/5788	2
Yellow	BP	GO:0032479	regulation of type I interferon production	3/60	113/18493	0.00590286	0.0490548	0.0371588	9111/29108/6850	3
Yellow	BP	GO:0097191	extrinsic apoptotic signaling pathway	4/60	224/18493	0.00601557	0.049511	0.0375043	2534/5788/29108/7133	4
Yellow	BP	GO:0032606	type I interferon production	3/60	114/18493	0.00604856	0.049511	0.0375043	9111/29108/6850	3
Yellow	BP	GO:0046131	pyrimidine ribonucleoside metabolic process	2/60	36/18493	0.00607515	0.049511	0.0375043	9582/60489	2
Yellow	BP	GO:0050691	regulation of defense response to virus by host	2/60	36/18493	0.00607515	0.049511	0.0375043	60489/29108	2
Yellow	CC	GO:0030667	secretory granule membrane	7/62	295/19659	3.87327e-05	0.00662329	0.00509641	719/963/965/11025/5788/5873/7133	7
Yellow	CC	GO:0042581	specific granule	5/62	160/19659	0.000149296	0.0127648	0.00982213	719/963/1794/5873/7133	5
Yellow	CC	GO:0045335	phagocytic vesicle	4/62	124/19659	0.000634059	0.0338656	0.0260584	3105/3133/4688/6850	4
Yellow	CC	GO:0043025	neuronal cell body	7/62	483/19659	0.000792177	0.0338656	0.0260584	199/3249/3676/3800/5152/29108/7133	7
Yellow	CC	GO:0033267	axon part	6/62	373/19659	0.00112553	0.0384931	0.0296192	26053/645/3676/3800/6695/7133	6
Yellow	CC	GO:0055038	recycling endosome membrane	3/62	77/19659	0.0018507	0.0466607	0.0359039	3105/3133/10397	3
Yellow	CC	GO:0055037	recycling endosome	4/62	167/19659	0.00191009	0.0466607	0.0359039	9873/3105/3133/10397	4
Turquoise	BP	GO:0042119	neutrophil activation	61/555	498/18493	5.10696e-21	2.35993e-17	1.90248e-17	47/221/226/272/317/353/683/728/124583/6352/57126/11314/948/22918/634/1084/4680/23601/1265/1476/2919/1536/23191/8560/1776/1832/1778/2204/2207/10875/2268/2357/3417/3606/3615/3684/3689/3848/3903/4126/4282/9761/64386/4317/3071/4973/51316/5329/5657/5836/56729/391/6402/8778/140885/6515/6518/353189/2040/9145/8876	61
Turquoise	BP	GO:0002283	neutrophil activation involved in immune response	59/555	488/18493	4.50802e-20	1.04158e-16	8.39679e-17	47/221/226/272/317/353/683/728/124583/57126/11314/948/22918/634/1084/4680/23601/1265/1476/2919/1536/23191/8560/1776/1832/1778/2204/2207/10875/2268/2357/3417/3615/3684/3689/3848/3903/4126/4282/9761/64386/4317/3071/4973/51316/5329/5657/5836/56729/391/6402/8778/140885/6515/6518/353189/2040/9145/8876	59
Turquoise	BP	GO:0002446	neutrophil mediated immunity	59/555	499/18493	1.35212e-19	1.87817e-16	1.5141e-16	47/221/226/272/317/353/683/728/124583/57126/11314/948/22918/634/1084/4680/23601/1265/1476/2919/1536/23191/8560/1776/1832/1778/2204/2207/10875/2268/2357/3417/3615/3684/3689/3848/3903/4126/4282/9761/64386/4317/3071/4973/51316/5329/5657/5836/56729/391/6402/8778/140885/6515/6518/353189/2040/9145/8876	59
Turquoise	BP	GO:0043312	neutrophil degranulation	58/555	485/18493	1.62577e-19	1.87817e-16	1.5141e-16	47/221/226/272/317/353/683/728/124583/57126/11314/948/22918/634/1084/4680/23601/1265/1476/2919/1536/23191/8560/1832/1778/2204/2207/10875/2268/2357/3417/3615/3684/3689/3848/3903/4126/4282/9761/64386/4317/3071/4973/51316/5329/5657/5836/56729/391/6402/8778/140885/6515/6518/353189/2040/9145/8876	58
Turquoise	BP	GO:0050900	leukocyte migration	51/555	478/18493	3.29064e-15	3.04121e-12	2.4517e-12	119/482/683/708/727/728/6352/729230/57126/914/11314/962/634/1084/4680/1524/2919/6387/8291/4072/2207/64083/63940/3586/3603/3557/3635/3684/3689/3815/3929/1130/4282/3071/4973/5197/5293/5657/5734/5880/6223/6402/140885/55423/8140/6693/6777/7060/7124/10451/7525	51
Turquoise	BP	GO:0097529	myeloid leukocyte migration	29/555	199/18493	1.7839e-12	1.3739e-09	1.10758e-09	683/708/727/728/6352/729230/57126/11314/1524/2919/6387/8291/2207/3557/3689/3815/3929/4282/3071/5197/5293/5657/5734/5880/6223/140885/6777/7060/10451	29
Turquoise	BP	GO:0045123	cellular extravasation	15/555	54/18493	3.51688e-11	2.19408e-08	1.76878e-08	119/683/729230/57126/1524/6387/64083/3689/5293/5657/5734/6402/140885/6693/7124	15
Turquoise	BP	GO:0001819	positive regulation of cytokine production	41/555	422/18493	3.79845e-11	2.19408e-08	1.76878e-08	9370/9447/9181/708/727/728/22900/834/729230/914/948/923/23601/1536/9451/51571/2207/2268/5045/63940/3586/3606/3557/3663/3929/4155/4282/4317/5027/5336/5588/5590/5734/54440/5345/6693/6777/6778/7099/7124/81030	41
Turquoise	BP	GO:0002697	regulation of immune effector process	41/555	439/18493	1.2931e-10	6.63933e-08	5.35236e-08	9447/695/708/717/727/728/729/729230/57126/930/11314/948/10225/634/1776/51571/2207/2268/3586/3606/3575/11213/3684/3689/3929/10859/4282/5027/5590/5880/6223/54440/4068/6777/6778/7099/7124/7128/10758/7454/10269	41
Turquoise	BP	GO:0022407	regulation of cell-cell adhesion	38/555	388/18493	1.60117e-10	7.39899e-08	5.96476e-08	9370/641/6352/729230/11314/923/999/634/4680/6387/4072/51571/3169/53827/3586/3606/3557/3575/182/54900/10859/4155/3071/5588/5590/5747/864/54440/5345/140885/55423/8631/10653/6693/6777/7124/8876/7525	38
Turquoise	BP	GO:0002703	regulation of leukocyte mediated immunity	26/555	196/18493	2.14584e-10	9.01448e-08	7.26711e-08	695/729230/57126/11314/10225/634/1776/51571/2207/2268/3586/3606/3575/3684/3689/10859/5027/5590/5880/54440/4068/6777/6778/7099/7124/7454	26
Turquoise	BP	GO:0050867	positive regulation of cell activation	37/555	384/18493	4.44945e-10	1.71341e-07	1.38128e-07	641/683/695/825/6352/729230/57126/914/952/923/51571/2207/2268/3586/3606/3575/3635/3684/3689/3929/10859/4282/4317/3071/5341/5588/5590/864/54440/140885/55423/6777/6778/7099/10451/8876/7525	37
Turquoise	BP	GO:0007159	leukocyte cell-cell adhesion	33/555	327/18493	1.23407e-09	4.20816e-07	3.39245e-07	119/641/6352/729230/57126/11314/923/634/1524/6387/51571/64083/3586/3606/3575/3689/54900/10859/3071/5588/5590/5880/864/54440/6402/140885/55423/8631/6693/6777/7124/8876/7525	33
Turquoise	BP	GO:0032680	regulation of tumor necrosis factor production	20/555	127/18493	1.27492e-09	4.20816e-07	3.39245e-07	9370/9181/729230/914/948/1149/1524/1536/2207/3586/11213/3929/10859/4282/4317/54440/140885/6693/7099/7128	20
Turquoise	BP	GO:0032640	tumor necrosis factor production	20/555	129/18493	1.69122e-09	5.21008e-07	4.20016e-07	9370/9181/729230/914/948/1149/1524/1536/2207/3586/11213/3929/10859/4282/4317/54440/140885/6693/7099/7128	20
Turquoise	BP	GO:0030595	leukocyte chemotaxis	26/555	217/18493	2.00264e-09	5.72704e-07	4.61691e-07	683/708/727/728/6352/729230/2919/6387/8291/2207/63940/3586/3603/3557/3689/3815/3929/1130/4282/3071/5197/5293/5880/6223/7060/10451	26
Turquoise	BP	GO:0007596	blood coagulation	33/555	334/18493	2.11598e-09	5.72704e-07	4.61691e-07	308/708/57126/948/634/51266/1606/10938/2162/2207/2623/2769/2811/3046/89781/3848/22915/5027/5197/5293/5329/5336/5341/5579/5588/5657/5055/5345/10019/7099/7225/10451/7454	33
Turquoise	BP	GO:1903555	regulation of tumor necrosis factor superfamily cytokine production	20/555	131/18493	2.23083e-09	5.72704e-07	4.61691e-07	9370/9181/729230/914/948/1149/1524/1536/2207/3586/11213/3929/10859/4282/4317/54440/140885/6693/7099/7128	20
Turquoise	BP	GO:0002696	positive regulation of leukocyte activation	35/555	372/18493	2.50162e-09	6.08421e-07	4.90484e-07	641/683/695/6352/729230/57126/914/952/923/51571/2207/2268/3586/3606/3575/3635/3684/3689/3929/10859/4282/4317/3071/5588/5590/864/54440/140885/55423/6777/6778/7099/10451/8876/7525	35
Turquoise	BP	GO:0007599	hemostasis	33/555	339/18493	3.07958e-09	6.78332e-07	5.46844e-07	308/708/57126/948/634/51266/1606/10938/2162/2207/2623/2769/2811/3046/89781/3848/22915/5027/5197/5293/5329/5336/5341/5579/5588/5657/5055/5345/10019/7099/7225/10451/7454	33
Turquoise	BP	GO:0050817	coagulation	33/555	340/18493	3.31642e-09	6.78332e-07	5.46844e-07	308/708/57126/948/634/51266/1606/10938/2162/2207/2623/2769/2811/3046/89781/3848/22915/5027/5197/5293/5329/5336/5341/5579/5588/5657/5055/5345/10019/7099/7225/10451/7454	33
Turquoise	BP	GO:0097530	granulocyte migration	20/555	134/18493	3.34542e-09	6.78332e-07	5.46844e-07	683/708/728/6352/57126/11314/2919/8291/2207/3557/3689/3929/3071/5197/5293/5657/5734/5880/7060/10451	20
Turquoise	BP	GO:0042110	T cell activation	39/555	451/18493	3.37625e-09	6.78332e-07	5.46844e-07	64919/641/6352/729230/914/11314/923/925/634/64581/51571/2207/3586/3606/3575/3702/3815/54900/10859/3071/5027/5293/639/5588/5590/5734/5880/864/54440/64218/140885/55423/6693/6777/6778/30968/8876/7454/7525	39
Turquoise	BP	GO:0071706	tumor necrosis factor superfamily cytokine production	20/555	135/18493	3.81921e-09	7.35356e-07	5.92814e-07	9370/9181/729230/914/948/1149/1524/1536/2207/3586/11213/3929/10859/4282/4317/54440/140885/6693/7099/7128	20
Turquoise	BP	GO:0002699	positive regulation of immune effector process	25/555	209/18493	4.24391e-09	7.84445e-07	6.32388e-07	695/729/729230/57126/11314/948/51571/2207/2268/3606/3684/3689/3929/10859/4282/5027/5590/5880/6223/54440/4068/6777/6778/7099/7124	25
Turquoise	BP	GO:1990266	neutrophil migration	18/555	112/18493	6.14364e-09	1.09191e-06	8.80256e-07	683/708/728/6352/57126/2919/8291/2207/3557/3689/3929/3071/5197/5293/5657/5880/7060/10451	18
Turquoise	BP	GO:0060326	cell chemotaxis	29/555	295/18493	2.26802e-08	3.88168e-06	3.12925e-06	683/708/727/728/6352/729230/1524/2919/6387/8291/2207/63940/3586/3603/3557/3689/3815/3929/1130/4282/3071/5197/5293/5588/5880/391/6223/7060/10451	29
Turquoise	BP	GO:0071216	cellular response to biotic stimulus	25/555	229/18493	2.7281e-08	4.50234e-06	3.6296e-06	317/695/22900/834/6352/948/923/1053/1524/2919/9451/3586/3606/3557/3929/10859/4282/5197/57088/140885/7099/54499/7124/7128/10269	25
Turquoise	BP	GO:0006909	phagocytosis	31/555	342/18493	4.89986e-08	7.80768e-06	6.29423e-06	10347/9370/717/919/11314/948/22918/1089/1053/64581/81035/23191/8291/2207/2268/3684/3689/3929/10787/3071/5027/5336/5657/5747/140885/55423/7124/10451/7454/7456/7525	31
Turquoise	BP	GO:0030593	neutrophil chemotaxis	16/555	101/18493	5.28759e-08	8.03032e-06	6.47372e-06	683/708/728/6352/2919/8291/2207/3557/3689/3929/3071/5197/5293/5880/7060/10451	16
Turquoise	BP	GO:0030098	lymphocyte differentiation	31/555	344/18493	5.59767e-08	8.03032e-06	6.47372e-06	64919/641/695/914/974/925/2207/3087/10320/3586/3606/3575/3635/3702/3815/4242/3071/5293/5336/23228/639/5590/5734/864/54440/64218/6693/6777/6778/7163/8876	31
Turquoise	BP	GO:0042533	tumor necrosis factor biosynthetic process	8/555	20/18493	5.7347e-08	8.03032e-06	6.47372e-06	729230/1524/1536/3586/3929/10859/6693/7099	8
Turquoise	BP	GO:0042534	regulation of tumor necrosis factor biosynthetic process	8/555	20/18493	5.7347e-08	8.03032e-06	6.47372e-06	729230/1524/1536/3586/3929/10859/6693/7099	8
Turquoise	BP	GO:0042089	cytokine biosynthetic process	16/555	105/18493	9.26671e-08	1.25945e-05	1.01532e-05	729230/1053/1524/1536/10644/3586/3606/3625/3635/3929/10859/5588/6693/6777/7099/7124	16
Turquoise	BP	GO:0050764	regulation of phagocytosis	14/555	80/18493	9.97409e-08	1.31687e-05	1.0616e-05	10347/9370/717/11314/948/8291/2207/2268/3684/3071/5657/140885/55423/7124	14
Turquoise	BP	GO:0042107	cytokine metabolic process	16/555	106/18493	1.06161e-07	1.34625e-05	1.08529e-05	729230/1053/1524/1536/10644/3586/3606/3625/3635/3929/10859/5588/6693/6777/7099/7124	16
Turquoise	BP	GO:0046631	alpha-beta T cell activation	18/555	134/18493	1.07793e-07	1.34625e-05	1.08529e-05	64919/641/729230/11314/3606/3702/10859/3071/639/5588/5590/5734/864/54440/64218/6693/6778/30968	18
Turquoise	BP	GO:0050878	regulation of body fluid levels	38/555	493/18493	1.14554e-07	1.39304e-05	1.12301e-05	308/353/358/708/57126/948/634/51266/66002/1606/10938/2162/2207/2623/2769/2811/3046/89781/3848/22915/5027/5197/5293/5329/5336/5341/5579/5588/5657/5055/5345/10019/6583/6777/7099/7225/10451/7454	38
Turquoise	BP	GO:0070661	leukocyte proliferation	27/555	283/18493	1.28477e-07	1.52229e-05	1.22721e-05	641/683/695/6352/729230/11314/952/923/3586/3606/3575/3615/3635/3815/10859/4282/3071/5027/23228/5588/5880/54440/6693/6777/7099/7128/10451	27
Turquoise	BP	GO:1904951	positive regulation of establishment of protein localization	35/555	437/18493	1.46279e-07	1.65325e-05	1.33279e-05	9447/727/22900/834/10574/914/952/999/10519/23601/2268/64083/55204/3002/3059/89781/3586/3684/3689/4155/4282/4317/65220/5027/9141/5590/5734/5880/27230/2040/7099/7124/7531/10971/79752	35
Turquoise	BP	GO:0034113	heterotypic cell-cell adhesion	12/555	59/18493	1.46686e-07	1.65325e-05	1.33279e-05	9370/914/4680/1829/1832/3586/3557/3689/4155/140885/8631/7124	12
Turquoise	BP	GO:0006968	cellular defense response	12/555	61/18493	2.16122e-07	2.37786e-05	1.91693e-05	728/729230/11126/930/23601/1524/10578/3702/3929/5551/4068/6693	12
Turquoise	BP	GO:0051091	positive regulation of DNA-binding transcription factor activity	25/555	255/18493	2.23831e-07	2.40541e-05	1.93914e-05	9447/9181/55859/695/825/948/10519/1524/3169/3059/8517/3586/3606/11213/3689/3815/5579/5588/5590/54101/8877/6788/7099/7124/6737	25
Turquoise	BP	GO:0002819	regulation of adaptive immune response	19/555	157/18493	2.56821e-07	2.6972e-05	2.17437e-05	695/729230/962/634/51571/2207/3586/3606/3575/10859/5027/5588/5590/54440/8631/6778/7124/7128/7454	19
Turquoise	BP	GO:0032103	positive regulation of response to external stimulus	27/555	297/18493	3.40337e-07	3.49488e-05	2.81743e-05	695/708/728/6352/729230/923/6387/8291/2167/2207/63940/3603/3606/3684/3689/3929/4282/4317/3071/5734/5880/6223/5345/6777/7060/7099/7124	27
Turquoise	BP	GO:0050663	cytokine secretion	22/555	210/18493	3.82712e-07	3.84459e-05	3.09936e-05	9447/727/22900/834/914/948/1149/23601/8291/2268/3586/55366/10859/4155/4282/4317/5027/5590/5734/7099/7124/7128	22
Turquoise	BP	GO:0051092	positive regulation of NF-kappaB transcription factor activity	18/555	146/18493	4.00696e-07	3.9396e-05	3.17595e-05	9447/9181/695/825/948/10519/1524/8517/3606/11213/3689/5579/5588/5590/54101/8877/7099/7124	18
Turquoise	BP	GO:0050901	leukocyte tethering or rolling	8/555	25/18493	4.31185e-07	3.98705e-05	3.2142e-05	119/729230/1524/6387/64083/6402/6693/7124	8
Turquoise	BP	GO:0046651	lymphocyte proliferation	25/555	264/18493	4.32343e-07	3.98705e-05	3.2142e-05	641/683/695/6352/729230/11314/952/923/3586/3606/3575/3615/3635/10859/4282/3071/5027/23228/5588/5880/54440/6693/6777/7099/10451	25
Turquoise	BP	GO:0045785	positive regulation of cell adhesion	32/555	397/18493	4.37474e-07	3.98705e-05	3.2142e-05	641/708/6352/729230/948/923/4680/10519/6387/8291/129080/51571/3169/3586/3606/3575/10859/22915/3071/5588/5590/864/54440/5345/140885/55423/8631/6777/7124/10451/8876/7525	32
Turquoise	BP	GO:0002718	regulation of cytokine production involved in immune response	13/555	77/18493	4.40913e-07	3.98705e-05	3.2142e-05	695/948/10225/2207/3586/3606/11213/10859/4282/5590/54440/7099/7124	13
Turquoise	BP	GO:0032635	interleukin-6 production	17/555	132/18493	4.48662e-07	3.98705e-05	3.2142e-05	9181/948/2207/3586/3606/3557/3635/11213/3929/4155/4317/3071/5027/140885/7099/7124/7128	17
Turquoise	BP	GO:0032943	mononuclear cell proliferation	25/555	266/18493	4.98247e-07	4.33178e-05	3.4921e-05	641/683/695/6352/729230/11314/952/923/3586/3606/3575/3615/3635/10859/4282/3071/5027/23228/5588/5880/54440/6693/6777/7099/10451	25
Turquoise	BP	GO:0042113	B cell activation	27/555	303/18493	5.06202e-07	4.33178e-05	3.4921e-05	683/695/11314/952/974/9156/3087/3586/3575/3635/3815/7462/54900/4242/4282/3071/5293/5336/23228/5579/54440/6777/6778/7099/7128/7163/10451	27
Turquoise	BP	GO:0051222	positive regulation of protein transport	32/555	402/18493	5.77013e-07	4.84796e-05	3.90823e-05	9447/727/22900/834/914/952/999/10519/23601/2268/64083/55204/3059/89781/3586/3684/3689/4155/4282/4317/65220/5027/9141/5590/5734/5880/27230/2040/7099/7124/7531/79752	32
Turquoise	BP	GO:0071621	granulocyte chemotaxis	16/555	120/18493	6.06718e-07	4.95314e-05	3.99302e-05	683/708/728/6352/2919/8291/2207/3557/3689/3929/3071/5197/5293/5880/7060/10451	16
Turquoise	BP	GO:0022409	positive regulation of cell-cell adhesion	24/555	251/18493	6.16655e-07	4.95314e-05	3.99302e-05	641/6352/729230/923/4680/51571/3169/3586/3606/3575/10859/3071/5588/5590/864/54440/5345/140885/55423/8631/6777/7124/8876/7525	24
Turquoise	BP	GO:0070663	regulation of leukocyte proliferation	22/555	216/18493	6.21688e-07	4.95314e-05	3.99302e-05	641/683/695/6352/729230/11314/952/923/3586/3606/3635/10859/4282/3071/5588/5880/54440/6693/6777/7099/7128/10451	22
Turquoise	BP	GO:0002768	immune response-regulating cell surface receptor signaling pathway	34/555	445/18493	6.59079e-07	5.16204e-05	4.16143e-05	695/728/930/919/11314/952/974/634/23191/2207/2268/2357/8517/3635/3702/3815/7462/10859/10787/3071/5293/5336/23228/59338/5579/5588/5747/79037/8631/30968/10451/7454/7456/7525	34
Turquoise	BP	GO:0050707	regulation of cytokine secretion	20/555	184/18493	7.18562e-07	5.53413e-05	4.46139e-05	9447/727/22900/834/914/1149/23601/2268/3586/55366/10859/4155/4282/4317/5027/5590/5734/7099/7124/7128	20
Turquoise	BP	GO:0042035	regulation of cytokine biosynthetic process	14/555	94/18493	7.84058e-07	5.93956e-05	4.78824e-05	729230/1524/1536/10644/3586/3625/3635/3929/10859/5588/6693/6777/7099/7124	14
Turquoise	BP	GO:0032675	regulation of interleukin-6 production	16/555	123/18493	8.51406e-07	6.245e-05	5.03446e-05	9181/948/2207/3586/3557/3635/11213/3929/4155/4317/3071/5027/140885/7099/7124/7128	16
Turquoise	BP	GO:0050715	positive regulation of cytokine secretion	16/555	123/18493	8.51406e-07	6.245e-05	5.03446e-05	9447/727/22900/834/914/23601/2268/3586/4155/4282/4317/5027/5590/5734/7099/7124	16
Turquoise	BP	GO:1903037	regulation of leukocyte cell-cell adhesion	26/555	293/18493	8.90883e-07	6.33648e-05	5.10821e-05	641/6352/729230/11314/923/634/6387/51571/3586/3606/3575/54900/10859/3071/5588/5590/864/54440/140885/55423/8631/6693/6777/7124/8876/7525	26
Turquoise	BP	GO:0002367	cytokine production involved in immune response	14/555	95/18493	8.94635e-07	6.33648e-05	5.10821e-05	695/948/10225/2207/3586/3606/11213/3815/10859/4282/5590/54440/7099/7124	14
Turquoise	BP	GO:0051249	regulation of lymphocyte activation	35/555	472/18493	9.05015e-07	6.33648e-05	5.10821e-05	641/683/695/6352/729230/914/11314/952/923/634/51571/3586/3606/3575/3635/54900/10859/4282/3071/639/5588/5590/5880/864/54440/140885/55423/6693/6777/6778/7099/7128/10451/8876/7525	35
Turquoise	BP	GO:0050670	regulation of lymphocyte proliferation	21/555	205/18493	1.01634e-06	7.00973e-05	5.65096e-05	641/683/695/6352/729230/11314/952/923/3586/3606/3635/10859/4282/3071/5588/5880/54440/6693/6777/7099/10451	21
Turquoise	BP	GO:0002460	adaptive immune response based on somatic recombination of immune receptors built from immunoglobulin superfamily domains	29/555	354/18493	1.0973e-06	7.26565e-05	5.85727e-05	695/708/717/727/729/729230/925/634/9156/51571/2207/3586/3606/3575/3635/182/10859/5027/5551/5588/5590/54440/64218/6693/6778/7099/7124/7128/7454	29
Turquoise	BP	GO:0002429	immune response-activating cell surface receptor signaling pathway	32/555	414/18493	1.09737e-06	7.26565e-05	5.85727e-05	695/728/930/919/11314/952/974/634/23191/2207/2268/2357/8517/3635/3702/7462/10787/3071/5293/5336/23228/59338/5579/5588/5747/79037/8631/30968/10451/7454/7456/7525	32
Turquoise	BP	GO:0032944	regulation of mononuclear cell proliferation	21/555	206/18493	1.10062e-06	7.26565e-05	5.85727e-05	641/683/695/6352/729230/11314/952/923/3586/3606/3635/10859/4282/3071/5588/5880/54440/6693/6777/7099/10451	21
Turquoise	BP	GO:0090022	regulation of neutrophil chemotaxis	8/555	28/18493	1.14437e-06	7.44805e-05	6.00432e-05	683/708/728/8291/3929/3071/5880/7060	8
Turquoise	BP	GO:0030888	regulation of B cell proliferation	11/555	59/18493	1.22186e-06	7.84195e-05	6.32186e-05	683/695/11314/952/3586/3635/4282/3071/54440/7099/10451	11
Turquoise	BP	GO:0002237	response to molecule of bacterial origin	28/555	337/18493	1.27284e-06	8.05727e-05	6.49545e-05	728/22900/834/6352/948/923/10225/1053/1524/2919/3586/3587/3606/3557/11213/3663/3929/10859/4282/5027/5197/5336/57088/5734/140885/7099/7124/7128	28
Turquoise	BP	GO:0002822	regulation of adaptive immune response based on somatic recombination of immune receptors built from immunoglobulin superfamily domains	17/555	144/18493	1.55066e-06	9.68324e-05	7.80623e-05	695/729230/634/51571/2207/3586/3606/3575/10859/5027/5588/5590/54440/6778/7124/7128/7454	17
Turquoise	BP	GO:0032760	positive regulation of tumor necrosis factor production	12/555	73/18493	1.64389e-06	0.000101286	8.16525e-05	9181/729230/914/948/1536/2207/3929/4282/4317/54440/6693/7099	12
Turquoise	BP	GO:0032496	response to lipopolysaccharide	27/555	324/18493	1.85998e-06	0.000110002	8.86792e-05	728/22900/834/6352/948/923/10225/1053/1524/2919/3586/3587/3606/3557/11213/3929/10859/4282/5027/5197/5336/57088/5734/140885/7099/7124/7128	27
Turquoise	BP	GO:2000106	regulation of leukocyte apoptotic process	13/555	87/18493	1.86698e-06	0.000110002	8.86792e-05	641/695/6352/6387/2207/3059/3586/3575/10859/4282/5027/5293/5588	13
Turquoise	BP	GO:0002706	regulation of lymphocyte mediated immunity	17/555	146/18493	1.881e-06	0.000110002	8.86792e-05	695/10225/634/51571/2207/3586/3606/3575/10859/5027/5590/54440/4068/6777/6778/7124/7454	17
Turquoise	BP	GO:0050863	regulation of T cell activation	26/555	305/18493	1.89426e-06	0.000110002	8.86792e-05	641/6352/729230/914/11314/923/634/51571/3586/3606/3575/54900/10859/3071/639/5588/5590/5880/864/54440/140885/55423/6693/6777/8876/7525	26
Turquoise	BP	GO:0002449	lymphocyte mediated immunity	28/555	344/18493	1.90626e-06	0.000110002	8.86792e-05	695/708/717/727/729/925/10225/634/9156/51571/2207/3002/3586/3606/3575/3635/182/10859/1130/5027/5551/5590/54440/4068/6777/6778/7124/7454	28
Turquoise	BP	GO:0050727	regulation of inflammatory response	32/555	425/18493	1.92819e-06	0.000110002	8.86792e-05	9370/683/695/708/717/727/728/729/6352/729230/930/923/1776/2167/2207/63940/3586/3606/3684/3689/3848/3929/9258/4317/5734/6223/140885/6542/6777/7099/7124/7128	32
Turquoise	BP	GO:0030099	myeloid cell differentiation	31/555	405/18493	1.98308e-06	0.000111754	9.00915e-05	9370/634/1053/10519/51266/23601/1945/2207/2623/2739/2811/3059/10320/3635/182/3815/10859/4055/4211/9258/3071/5293/5579/5588/5657/9770/6223/6777/7099/7124/10107	31
Turquoise	BP	GO:0002685	regulation of leukocyte migration	19/555	180/18493	2.11522e-06	0.000117225	9.4502e-05	683/708/727/728/6352/729230/11314/1524/6387/8291/63940/3929/4282/3071/5734/5880/6693/7060/7124	19
Turquoise	BP	GO:0031349	positive regulation of defense response	32/555	427/18493	2.1309e-06	0.000117225	9.4502e-05	9447/80216/695/708/6352/729230/11314/948/923/64581/81035/2167/2207/63940/8517/3606/11213/3684/3689/3929/55366/9258/4317/5336/5734/6223/4068/6777/7099/7124/7128/81030	32
Turquoise	BP	GO:0002886	regulation of myeloid leukocyte mediated immunity	10/555	51/18493	2.30684e-06	0.000125411	0.000101101	695/729230/57126/11314/1776/2207/2268/3684/3689/5880	10
Turquoise	BP	GO:0050729	positive regulation of inflammatory response	16/555	133/18493	2.44327e-06	0.000131047	0.000105645	695/729230/923/2167/2207/63940/3606/3684/3689/3929/4317/5734/6223/6777/7099/7124	16
Turquoise	BP	GO:0071222	cellular response to lipopolysaccharide	20/555	199/18493	2.46723e-06	0.000131047	0.000105645	22900/834/6352/948/923/1053/1524/2919/3586/3606/3557/3929/10859/4282/5197/57088/140885/7099/7124/7128	20
Turquoise	BP	GO:1903557	positive regulation of tumor necrosis factor superfamily cytokine production	12/555	76/18493	2.55594e-06	0.000134216	0.000108199	9181/729230/914/948/1536/2207/3929/4282/4317/54440/6693/7099	12
Turquoise	BP	GO:1902622	regulation of neutrophil migration	8/555	31/18493	2.6827e-06	0.000139289	0.00011229	683/708/728/8291/3929/3071/5880/7060	8
Turquoise	BP	GO:0043030	regulation of macrophage activation	10/555	52/18493	2.78016e-06	0.000142746	0.000115076	3586/3684/3689/3929/9258/4282/4317/6542/7099/7124	10
Turquoise	BP	GO:0030193	regulation of blood coagulation	12/555	77/18493	2.9464e-06	0.000147993	0.000119306	308/948/634/2207/2811/3848/5329/5341/5588/5055/5345/7099	12
Turquoise	BP	GO:1900046	regulation of hemostasis	12/555	77/18493	2.9464e-06	0.000147993	0.000119306	308/948/634/2207/2811/3848/5329/5341/5588/5055/5345/7099	12
Turquoise	BP	GO:0001818	negative regulation of cytokine production	23/555	256/18493	3.07378e-06	0.00015251	0.000122948	9370/695/708/22900/10225/634/1149/1524/5045/3586/3625/3635/11213/3929/55366/10859/4317/3071/5734/140885/7099/7124/7128	23
Turquoise	BP	GO:1903532	positive regulation of secretion by cell	29/555	373/18493	3.12312e-06	0.00015251	0.000122948	9447/727/22900/834/57126/914/952/27243/23601/6387/2207/2268/64083/55204/3586/3625/3684/3689/4155/4282/4317/65220/5027/5590/5734/56729/27230/7099/7124	29
Turquoise	BP	GO:0042100	B cell proliferation	13/555	91/18493	3.13535e-06	0.00015251	0.000122948	683/695/11314/952/3586/3575/3635/4282/3071/23228/54440/7099/10451	13
Turquoise	BP	GO:0090023	positive regulation of neutrophil chemotaxis	7/555	23/18493	3.40686e-06	0.000159634	0.000128691	708/728/8291/3929/3071/5880/7060	7
Turquoise	BP	GO:0043300	regulation of leukocyte degranulation	9/555	42/18493	3.40928e-06	0.000159634	0.000128691	729230/57126/11314/634/2207/2268/3684/3689/5880	9
Turquoise	BP	GO:0071622	regulation of granulocyte chemotaxis	9/555	42/18493	3.40928e-06	0.000159634	0.000128691	683/708/728/6352/8291/3929/3071/5880/7060	9
Turquoise	BP	GO:0032609	interferon-gamma production	14/555	106/18493	3.41999e-06	0.000159634	0.000128691	708/729230/914/10225/51571/3586/3606/3702/10859/54440/140885/6693/7099/7124	14
Turquoise	BP	GO:0002683	negative regulation of immune system process	32/555	437/18493	3.4735e-06	0.00016051	0.000129397	9370/695/708/727/729230/11314/10225/634/10519/6387/2207/3586/3575/3635/11213/54900/55366/10859/4211/9258/4282/23228/5734/79037/6223/864/6693/6777/6778/7099/7124/7128	32
Turquoise	BP	GO:0050851	antigen receptor-mediated signaling pathway	23/555	259/18493	3.74099e-06	0.00017116	0.000137982	695/930/919/11314/952/974/634/8517/3635/3702/7462/3071/5293/5336/23228/59338/5579/5588/79037/8631/30968/10451/7454	23
Turquoise	BP	GO:0071887	leukocyte apoptotic process	14/555	107/18493	3.82826e-06	0.000173435	0.000139817	641/695/6352/6387/2207/3059/3586/3575/10859/4282/5027/5293/5588/10758	14
Turquoise	BP	GO:0071219	cellular response to molecule of bacterial origin	20/555	206/18493	4.19782e-06	0.000188331	0.000151825	22900/834/6352/948/923/1053/1524/2919/3586/3606/3557/3929/10859/4282/5197/57088/140885/7099/7124/7128	20
Turquoise	BP	GO:0042116	macrophage activation	12/555	80/18493	4.45125e-06	0.000197781	0.000159443	22918/8291/3586/3684/3689/3929/9258/4282/4317/6542/7099/7124	12
Turquoise	BP	GO:0002688	regulation of leukocyte chemotaxis	14/555	109/18493	4.77702e-06	0.000210234	0.000169482	683/708/727/728/6352/729230/6387/8291/63940/3929/4282/3071/5880/7060	14
Turquoise	BP	GO:0051047	positive regulation of secretion	30/555	404/18493	5.3212e-06	0.000231974	0.000187008	9447/358/727/22900/834/57126/914/952/27243/23601/6387/2207/2268/64083/55204/3586/3625/3684/3689/4155/4282/4317/65220/5027/5590/5734/56729/27230/7099/7124	30
Turquoise	BP	GO:0050818	regulation of coagulation	12/555	82/18493	5.7967e-06	0.000250342	0.000201815	308/948/634/2207/2811/3848/5329/5341/5588/5055/5345/7099	12
Turquoise	BP	GO:0045088	regulation of innate immune response	28/555	365/18493	5.95042e-06	0.000254601	0.000205249	9447/80216/695/708/6352/11314/948/10225/634/64581/81035/2207/2268/8517/11213/3684/3689/3929/55366/10859/9258/5336/6223/4068/6777/7099/7128/81030	28
Turquoise	BP	GO:0034114	regulation of heterotypic cell-cell adhesion	7/555	25/18493	6.34025e-06	0.000266348	0.000214719	9370/4680/3586/3557/4155/8631/7124	7
Turquoise	BP	GO:0071624	positive regulation of granulocyte chemotaxis	7/555	25/18493	6.34025e-06	0.000266348	0.000214719	708/728/8291/3929/3071/5880/7060	7
Turquoise	BP	GO:1903039	positive regulation of leukocyte cell-cell adhesion	20/555	214/18493	7.47061e-06	0.000311006	0.000250721	641/6352/729230/923/51571/3606/3575/10859/3071/5588/5590/864/54440/140885/55423/8631/6777/7124/8876/7525	20
Turquoise	BP	GO:0030217	T cell differentiation	21/555	234/18493	8.35491e-06	0.000344714	0.000277895	64919/641/914/925/2207/3606/3575/3702/3815/3071/5293/639/5590/5734/864/54440/64218/6693/6777/6778/8876	21
Turquoise	BP	GO:1902624	positive regulation of neutrophil migration	7/555	26/18493	8.45268e-06	0.000345662	0.000278659	708/728/8291/3929/3071/5880/7060	7
Turquoise	BP	GO:0002705	positive regulation of leukocyte mediated immunity	15/555	131/18493	9.25382e-06	0.000375104	0.000302394	695/57126/51571/2207/2268/3606/3684/3689/5027/5590/54440/4068/6777/6778/7124	15
Turquoise	BP	GO:0051251	positive regulation of lymphocyte activation	26/555	333/18493	9.34232e-06	0.000375399	0.000302631	641/683/695/6352/729230/952/923/51571/3606/3575/3635/10859/4282/3071/5588/5590/864/54440/140885/55423/6777/6778/7099/10451/8876/7525	26
Turquoise	BP	GO:0042535	positive regulation of tumor necrosis factor biosynthetic process	5/555	11/18493	9.50952e-06	0.000378823	0.000305392	729230/1536/3929/6693/7099	5
Turquoise	BP	GO:0002544	chronic inflammatory response	6/555	18/18493	9.70436e-06	0.000383281	0.000308986	191/6352/3586/7124/7128/8876	6
Turquoise	BP	GO:0046632	alpha-beta T cell differentiation	13/555	101/18493	1.01529e-05	0.000395406	0.00031876	64919/641/3606/3702/3071/639/5590/5734/864/54440/64218/6693/6778	13
Turquoise	BP	GO:0035690	cellular response to drug	27/555	355/18493	1.01825e-05	0.000395406	0.00031876	9370/9447/358/9181/53335/641/664/790/845/890/969/999/1536/2769/3586/3779/9688/5027/5111/59338/5831/140885/64754/6778/7124/7128/7225	27
Turquoise	BP	GO:0032612	interleukin-1 production	12/555	87/18493	1.0831e-05	0.000417086	0.000336238	9447/22900/834/948/634/1524/3586/5027/140885/8877/7099/7128	12
Turquoise	BP	GO:0061756	leukocyte adhesion to vascular endothelial cell	8/555	37/18493	1.12031e-05	0.000427848	0.000344914	119/729230/1524/6387/64083/6402/6693/7124	8
Turquoise	BP	GO:0090150	establishment of protein localization to membrane	25/555	317/18493	1.16587e-05	0.000441596	0.000355997	10519/64083/55204/3002/3684/3689/10434/4118/64112/51079/9141/4736/6136/6141/6159/6156/6165/6132/6205/6223/6193/10952/2040/7531/10971	25
Turquoise	BP	GO:0030168	platelet activation	16/555	152/18493	1.38362e-05	0.000519814	0.000419053	634/51266/1606/2207/2623/2769/2811/5197/5293/5336/5341/5579/5588/7099/7225/10451	16
Turquoise	BP	GO:0038093	Fc receptor signaling pathway	18/555	187/18493	1.41718e-05	0.000528128	0.000425756	695/919/23191/2207/2268/8517/3702/3815/7462/10787/3071/5336/5588/5747/10451/7454/7456/7525	18
Turquoise	BP	GO:0022408	negative regulation of cell-cell adhesion	17/555	170/18493	1.48322e-05	0.000548317	0.000442031	9370/11314/999/634/6387/4072/53827/3586/3557/182/54900/10859/4155/5747/864/10653/6693	17
Turquoise	BP	GO:0002532	production of molecular mediator involved in inflammatory response	10/555	63/18493	1.67056e-05	0.000612672	0.000493912	695/923/10225/2207/63940/3929/6223/140885/6542/7099	10
Turquoise	BP	GO:0019835	cytolysis	8/555	39/18493	1.69343e-05	0.000616168	0.00049673	727/729/3001/3002/3929/10859/5027/5551	8
Turquoise	BP	GO:0050853	B cell receptor signaling pathway	14/555	122/18493	1.78376e-05	0.000636893	0.000513438	695/930/11314/952/974/3702/7462/3071/5293/5336/23228/59338/5579/10451	14
Turquoise	BP	GO:0032652	regulation of interleukin-1 production	11/555	77/18493	1.79132e-05	0.000636893	0.000513438	9447/22900/834/634/1524/3586/5027/140885/8877/7099/7128	11
Turquoise	BP	GO:0050714	positive regulation of protein secretion	21/555	246/18493	1.79174e-05	0.000636893	0.000513438	9447/727/22900/834/914/952/23601/2268/64083/55204/3586/4155/4282/4317/65220/5027/5590/5734/27230/7099/7124	21
Turquoise	BP	GO:2000107	negative regulation of leukocyte apoptotic process	9/555	51/18493	1.82938e-05	0.000645311	0.000520224	641/6352/6387/2207/3059/3575/10859/4282/5588	9
Turquoise	BP	GO:0048872	homeostasis of number of cells	21/555	248/18493	2.02368e-05	0.00070844	0.000571116	272/729230/2207/2623/3059/10320/3575/3635/3815/55366/9258/4282/3071/5027/5293/9770/6223/54440/6777/7128/10107	21
Turquoise	BP	GO:2001233	regulation of apoptotic signaling pathway	28/555	391/18493	2.12308e-05	0.000737651	0.000594665	317/9181/664/27141/1524/6387/9451/50486/2623/3002/3625/4055/4118/4282/64112/51079/9141/5326/5329/8575/6672/6788/28978/7124/7128/8876/7531/10971	28
Turquoise	BP	GO:0032720	negative regulation of tumor necrosis factor production	9/555	52/18493	2.15409e-05	0.000742838	0.000598846	9370/1149/3586/11213/3929/10859/140885/7099/7128	9
Turquoise	BP	GO:0045089	positive regulation of innate immune response	24/555	309/18493	2.23284e-05	0.000764293	0.000616142	9447/80216/695/708/6352/11314/948/64581/81035/2207/8517/11213/3684/3689/3929/55366/9258/5336/6223/4068/6777/7099/7128/81030	24
Turquoise	BP	GO:0001906	cell killing	16/555	158/18493	2.24998e-05	0.000764497	0.000616307	634/1776/51571/10578/3002/85236/3606/3575/10859/1130/5027/5551/6156/6223/4068/6777	16
Turquoise	BP	GO:0106106	cold-induced thermogenesis	15/555	142/18493	2.45068e-05	0.000820621	0.000661552	9370/729230/948/1149/1778/2167/50486/2628/3606/55366/51316/23228/6319/6778/7099	15
Turquoise	BP	GO:0120161	regulation of cold-induced thermogenesis	15/555	142/18493	2.45068e-05	0.000820621	0.000661552	9370/729230/948/1149/1778/2167/50486/2628/3606/55366/51316/23228/6319/6778/7099	15
Turquoise	BP	GO:0032715	negative regulation of interleukin-6 production	8/555	41/18493	2.49474e-05	0.000829367	0.000668602	3586/3635/11213/3071/140885/7099/7124/7128	8
Turquoise	BP	GO:0060099	regulation of phagocytosis, engulfment	5/555	13/18493	2.51994e-05	0.00083176	0.000670531	10347/11314/948/3684/3071	5
Turquoise	BP	GO:1903034	regulation of response to wounding	16/555	160/18493	2.63069e-05	0.000862157	0.000695036	308/825/948/634/2207/2811/3586/3848/5329/5341/5588/5792/5055/5345/7099/7128	16
Turquoise	BP	GO:0032649	regulation of interferon-gamma production	12/555	95/18493	2.68539e-05	0.000873886	0.000704491	708/729230/914/10225/51571/3586/3606/10859/54440/140885/7099/7124	12
Turquoise	BP	GO:0006979	response to oxidative stress	30/555	441/18493	2.87859e-05	0.000930206	0.000749895	9370/221/358/664/695/890/948/952/1536/1718/51022/3417/3586/3848/4482/9688/5111/5037/59338/8575/5742/5831/140885/6778/2054/7099/7124/7128/7225/8876	30
Turquoise	BP	GO:1903556	negative regulation of tumor necrosis factor superfamily cytokine production	9/555	54/18493	2.95206e-05	0.000947325	0.000763695	9370/1149/3586/11213/3929/10859/140885/7099/7128	9
Turquoise	BP	GO:0034614	cellular response to reactive oxygen species	16/555	162/18493	3.06738e-05	0.000977541	0.000788054	358/664/695/890/948/51022/3586/9688/5111/59338/5831/140885/6778/7124/7128/7225	16
Turquoise	BP	GO:0072593	reactive oxygen species metabolic process	22/555	276/18493	3.28866e-05	0.00104088	0.000839118	664/683/57126/948/1524/51167/1536/23576/2053/3046/3586/3684/3689/4317/51079/5027/55022/5880/140885/6542/7099/7124	22
Turquoise	BP	GO:0150078	positive regulation of neuroinflammatory response	5/555	14/18493	3.82327e-05	0.00119374	0.000962343	3606/3684/3689/4317/7124	5
Turquoise	BP	GO:1905153	regulation of membrane invagination	5/555	14/18493	3.82327e-05	0.00119374	0.000962343	10347/11314/948/3684/3071	5
Turquoise	BP	GO:0031663	lipopolysaccharide-mediated signaling pathway	9/555	56/18493	3.98742e-05	0.00123338	0.000994305	22900/6352/923/3606/3929/4282/7099/7124/7128	9
Turquoise	BP	GO:0050870	positive regulation of T cell activation	18/555	202/18493	4.00363e-05	0.00123338	0.000994305	641/6352/729230/923/51571/3606/3575/10859/3071/5588/5590/864/54440/140885/55423/6777/8876/7525	18
Turquoise	BP	GO:0002690	positive regulation of leukocyte chemotaxis	11/555	84/18493	4.12142e-05	0.00126127	0.00101678	708/728/6352/729230/6387/8291/63940/3929/3071/5880/7060	11
Turquoise	BP	GO:0043303	mast cell degranulation	8/555	44/18493	4.27558e-05	0.00129983	0.00104787	695/11314/2207/2268/3815/7462/5293/5880	8
Turquoise	BP	GO:0050671	positive regulation of lymphocyte proliferation	14/555	132/18493	4.34358e-05	0.00131188	0.00105758	641/683/6352/729230/952/923/3606/4282/3071/5588/54440/6777/7099/10451	14
Turquoise	BP	GO:0050766	positive regulation of phagocytosis	9/555	57/18493	4.61069e-05	0.00138351	0.00111533	10347/717/948/2207/3684/3071/140885/55423/7124	9
Turquoise	BP	GO:1990845	adaptive thermogenesis	15/555	150/18493	4.66955e-05	0.00139029	0.0011208	9370/729230/948/1149/1778/2167/50486/2628/3606/55366/51316/23228/6319/6778/7099	15
Turquoise	BP	GO:0002700	regulation of production of molecular mediator of immune response	14/555	133/18493	4.72356e-05	0.00139029	0.0011208	695/948/10225/2207/3586/3606/11213/10859/4282/5590/54440/6778/7099/7124	14
Turquoise	BP	GO:0032946	positive regulation of mononuclear cell proliferation	14/555	133/18493	4.72356e-05	0.00139029	0.0011208	641/683/6352/729230/952/923/3606/4282/3071/5588/54440/6777/7099/10451	14
Turquoise	BP	GO:0002279	mast cell activation involved in immune response	8/555	45/18493	5.06482e-05	0.0014813	0.00119416	695/11314/2207/2268/3815/7462/5293/5880	8
Turquoise	BP	GO:0061041	regulation of wound healing	14/555	134/18493	5.1323e-05	0.00149159	0.00120246	308/825/948/634/2207/2811/3848/5329/5341/5588/5055/5345/7099/7128	14
Turquoise	BP	GO:0002793	positive regulation of peptide secretion	21/555	265/18493	5.37789e-05	0.00154374	0.0012445	9447/727/22900/834/914/952/23601/2268/64083/55204/3586/4155/4282/4317/65220/5027/5590/5734/27230/7099/7124	21
Turquoise	BP	GO:0051090	regulation of DNA-binding transcription factor activity	28/555	412/18493	5.37854e-05	0.00154374	0.0012445	9447/9181/55859/695/825/22900/948/10519/1524/3169/3059/8517/3586/3606/11213/3689/3815/5579/5588/5590/54101/6672/8877/6788/7099/7124/7128/6737	28
Turquoise	BP	GO:0043122	regulation of I-kappaB kinase/NF-kappaB signaling	19/555	226/18493	5.47912e-05	0.00155603	0.00125441	9370/80216/124583/825/22900/834/948/1524/8517/3557/4055/11040/5579/140885/7099/7124/7128/10758/23390	19
Turquoise	BP	GO:0002456	T cell mediated immunity	12/555	102/18493	5.4887e-05	0.00155603	0.00125441	925/634/51571/3606/3575/182/10859/5027/5551/5590/54440/7454	12
Turquoise	BP	GO:2001235	positive regulation of apoptotic signaling pathway	16/555	170/18493	5.52362e-05	0.00155638	0.00125469	317/664/27141/50486/3002/3625/4055/4118/64112/9141/5326/5329/8575/6788/7531/10971	16
Turquoise	BP	GO:0035710	CD4-positive, alpha-beta T cell activation	11/555	87/18493	5.7307e-05	0.00160494	0.00129384	3606/3071/5588/5590/5734/864/54440/64218/6693/6778/30968	11
Turquoise	BP	GO:0051260	protein homooligomerization	24/555	328/18493	5.81413e-05	0.0016185	0.00130477	32/9370/220/226/241/308/317/641/25776/919/974/27243/81035/51181/10938/9451/2207/3028/3615/4282/5092/10721/5551/2040	24
Turquoise	BP	GO:0001659	temperature homeostasis	16/555	171/18493	5.92842e-05	0.00164043	0.00132245	9370/729230/948/1149/1778/2167/50486/2628/3606/55366/51316/23228/6319/6778/7099/7124	16
Turquoise	BP	GO:0002448	mast cell mediated immunity	8/555	46/18493	5.97172e-05	0.00164258	0.00132418	695/11314/2207/2268/3815/7462/5293/5880	8
Turquoise	BP	GO:0006809	nitric oxide biosynthetic process	10/555	73/18493	6.2096e-05	0.00168791	0.00136073	948/1524/23576/3586/3689/4317/140885/6542/7099/7124	10
Turquoise	BP	GO:0032611	interleukin-1 beta production	10/555	73/18493	6.2096e-05	0.00168791	0.00136073	9447/22900/834/948/1524/5027/140885/8877/7099/7128	10
Turquoise	BP	GO:0050708	regulation of protein secretion	29/555	438/18493	6.33537e-05	0.00171203	0.00138017	9447/308/727/22900/834/6352/914/952/1149/23601/2268/64083/55204/3586/3625/55366/10859/4155/4282/4317/65220/5027/5590/5734/27230/6513/7099/7124/7128	29
Turquoise	BP	GO:0002687	positive regulation of leukocyte migration	13/555	121/18493	7.07435e-05	0.00190061	0.0015322	708/728/6352/729230/6387/8291/63940/3929/3071/5880/6693/7060/7124	13
Turquoise	BP	GO:0001909	leukocyte mediated cytotoxicity	12/555	105/18493	7.30937e-05	0.00194118	0.0015649	634/1776/51571/3002/3606/3575/10859/1130/5027/5551/4068/6777	12
Turquoise	BP	GO:0002821	positive regulation of adaptive immune response	12/555	105/18493	7.30937e-05	0.00194118	0.0015649	695/729230/51571/2207/3606/5027/5588/5590/54440/8631/6778/7124	12
Turquoise	BP	GO:0070665	positive regulation of leukocyte proliferation	14/555	139/18493	7.67425e-05	0.00202644	0.00163363	641/683/6352/729230/952/923/3606/4282/3071/5588/54440/6777/7099/10451	14
Turquoise	BP	GO:0010821	regulation of mitochondrion organization	16/555	176/18493	8.36933e-05	0.00219742	0.00177148	664/27141/64083/3002/89781/64112/9141/55022/5329/5880/30968/65084/28978/7416/7531/10971	16
Turquoise	BP	GO:0046634	regulation of alpha-beta T cell activation	11/555	91/18493	8.6937e-05	0.0022697	0.00182974	641/729230/11314/3606/10859/3071/639/5588/5590/864/54440	11
Turquoise	BP	GO:0006605	protein targeting	28/555	424/18493	8.83059e-05	0.00229248	0.0018481	8540/10519/2053/80273/89781/3417/3684/3689/51079/9141/5264/10531/5372/5880/4736/6136/6141/6159/6156/6165/6132/6205/6223/6193/10952/2040/9145/9804	28
Turquoise	BP	GO:0032623	interleukin-2 production	9/555	62/18493	9.10246e-05	0.0023368	0.00188384	729230/919/2207/3606/5588/54440/6777/30968/7128	9
Turquoise	BP	GO:0045428	regulation of nitric oxide biosynthetic process	9/555	62/18493	9.10246e-05	0.0023368	0.00188384	948/1524/23576/3586/3689/4317/140885/7099/7124	9
Turquoise	BP	GO:0097237	cellular response to toxic substance	19/555	235/18493	9.24827e-05	0.00236112	0.00190344	241/358/664/948/1536/3046/3586/3779/9688/5111/59338/55607/5742/5831/140885/6778/7124/7128/7225	19
Turquoise	BP	GO:0048871	multicellular organismal homeostasis	30/555	471/18493	9.56678e-05	0.00242902	0.00195817	32/9370/272/358/729230/948/952/1149/66002/1778/2167/50486/2623/2628/3606/3635/3848/55366/5027/51316/23228/8842/5880/54440/6319/6778/7099/7124/7128/1200	30
Turquoise	BP	GO:0002573	myeloid leukocyte differentiation	17/555	197/18493	9.69719e-05	0.00244867	0.00197402	9370/634/1053/1945/2207/2623/2739/3059/3635/3815/10859/4055/5293/5657/9770/7099/7124	17
Turquoise	BP	GO:0043032	positive regulation of macrophage activation	6/555	26/18493	9.80853e-05	0.00246018	0.0019833	3586/3684/3689/3929/4317/7099	6
Turquoise	BP	GO:0046209	nitric oxide metabolic process	10/555	77/18493	9.84925e-05	0.00246018	0.0019833	948/1524/23576/3586/3689/4317/140885/6542/7099/7124	10
Turquoise	BP	GO:0002221	pattern recognition receptor signaling pathway	16/555	179/18493	0.000102233	0.00253988	0.00204755	80216/695/708/11314/948/64581/81035/8517/11213/3684/3689/3929/55366/9258/7099/7128	16
Turquoise	BP	GO:0007249	I-kappaB kinase/NF-kappaB signaling	20/555	258/18493	0.000108864	0.00269016	0.0021687	9370/80216/695/124583/825/22900/834/948/1524/8517/3557/4055/11040/5579/140885/7099/7124/7128/10758/23390	20
Turquoise	BP	GO:0060627	regulation of vesicle-mediated transport	31/555	498/18493	0.000111527	0.00274131	0.00220993	10347/9370/717/729230/57126/11314/948/634/27243/1138/8291/10938/2207/2268/28964/3684/3689/10859/10434/3071/23327/5336/5579/5657/5880/9783/140885/55423/8867/7124/6843	31
Turquoise	BP	GO:0070301	cellular response to hydrogen peroxide	11/555	94/18493	0.00011698	0.00284991	0.00229749	358/664/3586/9688/5111/59338/5831/140885/6778/7128/7225	11
Turquoise	BP	GO:0032651	regulation of interleukin-1 beta production	9/555	64/18493	0.000117179	0.00284991	0.00229749	9447/22900/834/1524/5027/140885/8877/7099/7128	9
Turquoise	BP	GO:0002262	myeloid cell homeostasis	14/555	146/18493	0.000130397	0.00315479	0.00254326	272/729230/2207/2623/3059/10320/3635/3815/9258/3071/5293/6223/6777/10107	14
Turquoise	BP	GO:2001057	reactive nitrogen species metabolic process	10/555	80/18493	0.000136421	0.00328334	0.0026469	948/1524/23576/3586/3689/4317/140885/6542/7099/7124	10
Turquoise	BP	GO:0120162	positive regulation of cold-induced thermogenesis	11/555	96/18493	0.000141583	0.00338991	0.00273281	9370/729230/948/1778/2167/50486/2628/3606/51316/6319/6778	11
Turquoise	BP	GO:0001553	luteinization	4/555	10/18493	0.000145907	0.00347545	0.00280176	59338/56729/8879/6777	4
Turquoise	BP	GO:0050765	negative regulation of phagocytosis	5/555	18/18493	0.000148103	0.00350967	0.00282935	9370/11314/8291/5657/140885	5
Turquoise	BP	GO:0002709	regulation of T cell mediated immunity	9/555	66/18493	0.000149343	0.00352099	0.00283848	634/51571/3606/3575/10859/5027/5590/54440/7454	9
Turquoise	BP	GO:1903305	regulation of regulated secretory pathway	14/555	148/18493	0.000150721	0.00352402	0.00284092	729230/57126/11314/634/1138/2207/2268/28964/3684/3689/5579/5880/9783/6843	14
Turquoise	BP	GO:0032755	positive regulation of interleukin-6 production	10/555	81/18493	0.000151526	0.00352402	0.00284092	9181/948/2207/3557/3929/4155/4317/5027/7099/7124	10
Turquoise	BP	GO:0002888	positive regulation of myeloid leukocyte mediated immunity	6/555	28/18493	0.000152522	0.00352402	0.00284092	695/57126/2207/2268/3684/3689	6
Turquoise	BP	GO:0061082	myeloid leukocyte cytokine production	6/555	28/18493	0.000152522	0.00352402	0.00284092	948/2207/11213/3815/4282/7099	6
Turquoise	BP	GO:0002224	toll-like receptor signaling pathway	13/555	131/18493	0.000159482	0.00364835	0.00294115	695/11314/948/81035/8517/11213/3684/3689/3929/55366/9258/7099/7128	13
Turquoise	BP	GO:0050777	negative regulation of immune response	13/555	131/18493	0.000159482	0.00364835	0.00294115	729230/11314/10225/634/3586/3575/3635/11213/10859/6223/6778/7124/7128	13
Turquoise	BP	GO:0030890	positive regulation of B cell proliferation	7/555	40/18493	0.000166454	0.00378909	0.00305461	683/952/4282/3071/54440/7099/10451	7
Turquoise	BP	GO:0032602	chemokine production	10/555	82/18493	0.000168017	0.00380591	0.00306817	9370/727/3586/3606/3929/4155/4282/140885/7099/7124	10
Turquoise	BP	GO:0050852	T cell receptor signaling pathway	14/555	150/18493	0.000173729	0.00391609	0.003157	695/919/11314/634/8517/3635/3702/5293/5336/5588/79037/8631/30968/7454	14
Turquoise	BP	GO:0002791	regulation of peptide secretion	29/555	465/18493	0.00017861	0.00400658	0.00322994	9447/308/727/22900/834/6352/914/952/1149/23601/2268/64083/55204/3586/3625/55366/10859/4155/4282/4317/65220/5027/5590/5734/27230/6513/7099/7124/7128	29
Turquoise	BP	GO:0034599	cellular response to oxidative stress	21/555	289/18493	0.000182876	0.00408246	0.00329111	221/358/664/695/890/948/1536/51022/3586/9688/5111/59338/8575/5831/140885/6778/7099/7124/7128/7225/8876	21
Turquoise	BP	GO:0033032	regulation of myeloid cell apoptotic process	6/555	29/18493	0.000187472	0.00416494	0.00335761	9370/6352/23601/2207/4282/5293	6
Turquoise	BP	GO:0030866	cortical actin cytoskeleton organization	7/555	41/18493	0.000195588	0.00432446	0.0034862	3996/10787/3071/5341/7124/7454/7456	7
Turquoise	BP	GO:0002824	positive regulation of adaptive immune response based on somatic recombination of immune receptors built from immunoglobulin superfamily domains	11/555	100/18493	0.000204169	0.00449269	0.00362182	695/729230/51571/2207/3606/5027/5588/5590/54440/6778/7124	11
Turquoise	BP	GO:0045047	protein targeting to ER	12/555	117/18493	0.000207393	0.004542	0.00366158	5372/4736/6136/6141/6159/6156/6165/6132/6205/6223/6193/10952	12
Turquoise	BP	GO:0034115	negative regulation of heterotypic cell-cell adhesion	4/555	11/18493	0.000223849	0.00478891	0.00386062	9370/3586/3557/4155	4
Turquoise	BP	GO:0060100	positive regulation of phagocytosis, engulfment	4/555	11/18493	0.000223849	0.00478891	0.00386062	10347/948/3684/3071	4
Turquoise	BP	GO:0070587	regulation of cell-cell adhesion involved in gastrulation	4/555	11/18493	0.000223849	0.00478891	0.00386062	9370/3586/3557/4155	4
Turquoise	BP	GO:1902563	regulation of neutrophil activation	4/555	11/18493	0.000223849	0.00478891	0.00386062	57126/11314/3684/3689	4
Turquoise	BP	GO:1905155	positive regulation of membrane invagination	4/555	11/18493	0.000223849	0.00478891	0.00386062	10347/948/3684/3071	4
Turquoise	BP	GO:0002437	inflammatory response to antigenic stimulus	7/555	42/18493	0.000228703	0.00486417	0.00392129	191/695/923/2207/3586/9240/7124	7
Turquoise	BP	GO:0002218	activation of innate immune response	19/555	252/18493	0.000229472	0.00486417	0.00392129	9447/80216/695/708/11314/948/64581/81035/2207/8517/11213/3684/3689/3929/55366/9258/5336/7099/7128	19
Turquoise	BP	GO:1905477	positive regulation of protein localization to membrane	12/555	119/18493	0.000243243	0.00511182	0.00412094	10519/245812/3002/3684/3689/9141/391/10580/2040/7124/7531/10971	12
Turquoise	BP	GO:0042136	neurotransmitter biosynthetic process	11/555	102/18493	0.000243367	0.00511182	0.00412094	948/1524/23576/2571/3586/3689/4317/140885/6542/7099/7124	11
Turquoise	BP	GO:0002758	innate immune response-activating signal transduction	18/555	233/18493	0.000247226	0.00516937	0.00416734	80216/695/708/11314/948/64581/81035/2207/8517/11213/3684/3689/3929/55366/9258/5336/7099/7128	18
Turquoise	BP	GO:0002285	lymphocyte activation involved in immune response	15/555	174/18493	0.000248392	0.00517036	0.00416814	634/9156/2207/3586/3606/10859/4242/5336/23228/5590/5734/64218/6693/6778/7099	15
Turquoise	BP	GO:1903829	positive regulation of cellular protein localization	22/555	318/18493	0.000259468	0.0053767	0.00433448	10574/919/999/10519/245812/9451/2207/3002/3059/89781/3684/3689/9141/149628/5880/391/10580/2040/7124/7531/10971/79752	22
Turquoise	BP	GO:0000079	regulation of cyclin-dependent protein serine/threonine kinase activity	10/555	87/18493	0.00027491	0.00567124	0.00457192	641/8900/890/899/900/901/1022/3087/10527/7128	10
Turquoise	BP	GO:0042108	positive regulation of cytokine biosynthetic process	8/555	57/18493	0.000283234	0.00576071	0.00464405	729230/1536/3929/5588/6693/6777/7099/7124	8
Turquoise	BP	GO:0045576	mast cell activation	8/555	57/18493	0.000283234	0.00576071	0.00464405	695/11314/2207/2268/3815/7462/5293/5880	8
Turquoise	BP	GO:0070228	regulation of lymphocyte apoptotic process	8/555	57/18493	0.000283234	0.00576071	0.00464405	641/695/6352/3586/3575/4282/5027/5588	8
Turquoise	BP	GO:0072599	establishment of protein localization to endoplasmic reticulum	12/555	121/18493	0.000284233	0.00576071	0.00464405	5372/4736/6136/6141/6159/6156/6165/6132/6205/6223/6193/10952	12
Turquoise	BP	GO:0070227	lymphocyte apoptotic process	9/555	72/18493	0.000292902	0.00591048	0.00476479	641/695/6352/3586/3575/4282/5027/5588/10758	9
Turquoise	BP	GO:1905475	regulation of protein localization to membrane	15/555	177/18493	0.000298925	0.00600579	0.00484162	10519/245812/3002/3684/3689/10434/9141/55022/5590/391/10580/2040/7124/7531/10971	15
Turquoise	BP	GO:0002708	positive regulation of lymphocyte mediated immunity	11/555	105/18493	0.000313976	0.00622957	0.00502203	695/51571/2207/3606/5027/5590/54440/4068/6777/6778/7124	11
Turquoise	BP	GO:0006614	SRP-dependent cotranslational protein targeting to membrane	11/555	105/18493	0.000313976	0.00622957	0.00502203	4736/6136/6141/6159/6156/6165/6132/6205/6223/6193/10952	11
Turquoise	BP	GO:1901652	response to peptide	29/555	481/18493	0.000314107	0.00622957	0.00502203	9370/308/353/9181/9550/790/890/948/634/6387/1536/23191/3087/3586/3625/3663/182/55022/5579/5588/5590/5747/5791/56729/6513/10580/6777/7099/7128	29
Turquoise	BP	GO:0010518	positive regulation of phospholipase activity	8/555	58/18493	0.000320048	0.00631196	0.00508845	627/728/6352/2769/3702/3815/5590/8698	8
Turquoise	BP	GO:0033622	integrin activation	5/555	21/18493	0.000326474	0.00631196	0.00508845	6387/9928/5341/5734/8631	5
Turquoise	BP	GO:0043302	positive regulation of leukocyte degranulation	5/555	21/18493	0.000326474	0.00631196	0.00508845	57126/2207/2268/3684/3689	5
Turquoise	BP	GO:0033623	regulation of integrin activation	4/555	12/18493	0.000327823	0.00631196	0.00508845	9928/5341/5734/8631	4
Turquoise	BP	GO:0045579	positive regulation of B cell differentiation	4/555	12/18493	0.000327823	0.00631196	0.00508845	695/3635/3071/6777	4
Turquoise	BP	GO:0045779	negative regulation of bone resorption	4/555	12/18493	0.000327823	0.00631196	0.00508845	952/3635/5027/7128	4
Turquoise	BP	GO:0070586	cell-cell adhesion involved in gastrulation	4/555	12/18493	0.000327823	0.00631196	0.00508845	9370/3586/3557/4155	4
Turquoise	BP	GO:0071236	cellular response to antibiotic	13/555	141/18493	0.000330823	0.0063271	0.00510065	358/664/1536/3586/3779/9688/5111/59338/5831/140885/6778/7128/7225	13
Turquoise	BP	GO:0030851	granulocyte differentiation	6/555	32/18493	0.000331348	0.0063271	0.00510065	9370/634/1053/2623/3059/3635	6
Turquoise	BP	GO:0030100	regulation of endocytosis	19/555	260/18493	0.000340561	0.00647626	0.0052209	10347/9370/717/57126/11314/948/8291/2207/2268/3684/10859/3071/23327/5336/5657/140885/55423/8867/7124	19
Turquoise	BP	GO:0043367	CD4-positive, alpha-beta T cell differentiation	9/555	74/18493	0.000360731	0.0068317	0.00550744	3606/3071/5590/5734/864/54440/64218/6693/6778	9
Turquoise	BP	GO:0043123	positive regulation of I-kappaB kinase/NF-kappaB signaling	15/555	181/18493	0.000379899	0.00716535	0.00577642	9370/80216/124583/834/948/1524/8517/3557/4055/11040/5579/7099/7124/10758/23390	15
Turquoise	BP	GO:0030183	B cell differentiation	12/555	125/18493	0.000383993	0.00721315	0.00581495	695/974/3087/3586/3635/3815/4242/3071/5336/23228/6777/7163	12
Turquoise	BP	GO:0033028	myeloid cell apoptotic process	6/555	33/18493	0.000394815	0.00733624	0.00591418	9370/6352/23601/2207/4282/5293	6
Turquoise	BP	GO:0034142	toll-like receptor 4 signaling pathway	6/555	33/18493	0.000394815	0.00733624	0.00591418	3684/3689/3929/9258/7099/7128	6
Turquoise	BP	GO:1903706	regulation of hemopoiesis	26/555	418/18493	0.000396289	0.00733624	0.00591418	9370/695/914/634/10519/2623/2811/3059/3606/3575/3635/182/10859/4211/3071/639/5579/5588/5590/9770/864/54440/6777/7099/7124/8876	26
Turquoise	BP	GO:1904029	regulation of cyclin-dependent protein kinase activity	10/555	91/18493	0.000396897	0.00733624	0.00591418	641/8900/890/899/900/901/1022/3087/10527/7128	10
Turquoise	BP	GO:0032642	regulation of chemokine production	9/555	75/18493	0.000399214	0.00734967	0.005925	9370/727/3586/3929/4155/4282/140885/7099/7124	9
Turquoise	BP	GO:0030865	cortical cytoskeleton organization	7/555	46/18493	0.000409122	0.00750219	0.00604796	3996/10787/3071/5341/7124/7454/7456	7
Turquoise	BP	GO:0006732	coenzyme metabolic process	23/555	351/18493	0.000411358	0.00751338	0.00605698	32/47/23305/54988/10327/226/683/874/952/51181/58478/2327/3417/65220/5027/5092/22934/6319/6513/6515/7167/8876/55350	23
Turquoise	BP	GO:1902105	regulation of leukocyte differentiation	19/555	265/18493	0.000431617	0.00785237	0.00633026	9370/695/914/634/3059/3606/3575/3635/10859/3071/639/5590/9770/864/54440/6777/7099/7124/8876	19
Turquoise	BP	GO:0006613	cotranslational protein targeting to membrane	11/555	109/18493	0.000434289	0.00787	0.00634448	4736/6136/6141/6159/6156/6165/6132/6205/6223/6193/10952	11
Turquoise	BP	GO:0051656	establishment of organelle localization	29/555	491/18493	0.000439322	0.00793011	0.00639293	8120/9181/695/11314/27243/1138/1778/2207/2268/54874/28964/8517/9928/11004/3815/7462/3996/5027/5293/5579/5590/5747/5880/9783/2054/8867/7013/8615/6843	29
Turquoise	BP	GO:1904950	negative regulation of establishment of protein localization	15/555	184/18493	0.000452369	0.00813383	0.00655717	9370/308/22900/948/1149/3586/3625/55366/10859/10434/5734/6672/7013/7124/7128	15
Turquoise	BP	GO:0046635	positive regulation of alpha-beta T cell activation	8/555	61/18493	0.000454531	0.00814104	0.00656297	641/729230/3606/3071/5588/5590/864/54440	8
Turquoise	BP	GO:0044130	negative regulation of growth of symbiont in host	4/555	13/18493	0.000462323	0.00820834	0.00661723	948/3586/3929/7124	4
Turquoise	BP	GO:0097531	mast cell migration	4/555	13/18493	0.000462323	0.00820834	0.00661723	3815/5293/5880/6777	4
Turquoise	BP	GO:0070972	protein localization to endoplasmic reticulum	13/555	146/18493	0.000463617	0.00820834	0.00661723	11014/5372/4736/6136/6141/6159/6156/6165/6132/6205/6223/6193/10952	13
Turquoise	BP	GO:0090322	regulation of superoxide metabolic process	6/555	34/18493	0.000467391	0.00823085	0.00663537	683/57126/948/3684/3689/7124	6
Turquoise	BP	GO:0002720	positive regulation of cytokine production involved in immune response	7/555	47/18493	0.000468451	0.00823085	0.00663537	948/2207/3606/4282/5590/54440/7099	7
Turquoise	BP	GO:2000377	regulation of reactive oxygen species metabolic process	15/555	185/18493	0.000479017	0.00838462	0.00675934	664/683/57126/948/1524/23576/3586/3684/3689/4317/55022/5880/140885/7099/7124	15
Turquoise	BP	GO:0002440	production of molecular mediator of immune response	19/555	268/18493	0.000495831	0.00864617	0.00697019	695/948/10225/9156/2207/3586/3606/3575/11213/3815/10859/4282/10721/5590/54440/6778/7099/7124/10758	19
Turquoise	BP	GO:0051051	negative regulation of transport	29/555	495/18493	0.000500625	0.00869696	0.00701113	9370/308/22900/845/729230/11314/948/634/1149/23191/8291/3586/3625/55366/10859/10434/23327/55022/55607/5579/5657/5734/140885/6672/28978/7124/7128/7531/10971	29
Turquoise	BP	GO:0002698	negative regulation of immune effector process	11/555	111/18493	0.000507627	0.00876583	0.00706665	708/729230/11314/10225/634/3586/3575/11213/10859/6223/7124	11
Turquoise	BP	GO:0002228	natural killer cell mediated immunity	8/555	62/18493	0.000508384	0.00876583	0.00706665	10225/634/3002/3606/10859/1130/4068/6777	8
Turquoise	BP	GO:0045621	positive regulation of lymphocyte differentiation	10/555	94/18493	0.000515418	0.00885407	0.00713779	695/3606/3575/3635/3071/5590/864/54440/6777/8876	10
Turquoise	BP	GO:0050702	interleukin-1 beta secretion	7/555	48/18493	0.000534442	0.00913012	0.00736033	9447/22900/834/948/5027/7099/7128	7
Turquoise	BP	GO:0051289	protein homotetramerization	9/555	78/18493	0.000535439	0.00913012	0.00736033	32/220/226/25776/919/51181/3028/3615/5092	9
Turquoise	BP	GO:0010822	positive regulation of mitochondrion organization	11/555	112/18493	0.000548009	0.0092912	0.00749019	664/27141/3002/89781/64112/9141/5329/5880/30968/7531/10971	11
Turquoise	BP	GO:0050921	positive regulation of chemotaxis	12/555	130/18493	0.000548907	0.0092912	0.00749019	708/728/6352/729230/6387/8291/63940/3603/3929/3071/5880/7060	12
Turquoise	BP	GO:1905954	positive regulation of lipid localization	9/555	79/18493	0.000588517	0.00992532	0.00800139	10347/32/9370/948/1149/10938/4282/5027/56729	9
Turquoise	BP	GO:0050920	regulation of chemotaxis	16/555	210/18493	0.000624495	0.0103733	0.00836253	683/708/727/728/6352/729230/6387/8291/63940/3603/3929/4282/3071/5880/64218/7060	16
Turquoise	BP	GO:0048771	tissue remodeling	14/555	170/18493	0.000626725	0.0103733	0.00836253	729230/952/634/1945/3606/3635/182/55366/5027/5880/9770/7060/7128/1200	14
Turquoise	BP	GO:0050710	negative regulation of cytokine secretion	8/555	64/18493	0.00063159	0.0103733	0.00836253	22900/1149/3586/55366/10859/5734/7124/7128	8
Turquoise	BP	GO:0044126	regulation of growth of symbiont in host	4/555	14/18493	0.000631959	0.0103733	0.00836253	948/3586/3929/7124	4
Turquoise	BP	GO:0044146	negative regulation of growth of symbiont involved in interaction with host	4/555	14/18493	0.000631959	0.0103733	0.00836253	948/3586/3929/7124	4
Turquoise	BP	GO:0046851	negative regulation of bone remodeling	4/555	14/18493	0.000631959	0.0103733	0.00836253	952/3635/5027/7128	4
Turquoise	BP	GO:0002719	negative regulation of cytokine production involved in immune response	5/555	24/18493	0.000633038	0.0103733	0.00836253	10225/3586/11213/10859/7124	5
Turquoise	BP	GO:1900120	regulation of receptor binding	5/555	24/18493	0.000633038	0.0103733	0.00836253	9370/627/3586/23228/5792	5
Turquoise	BP	GO:1903409	reactive oxygen species biosynthetic process	11/555	115/18493	0.000685576	0.0111945	0.00902456	948/1524/1536/23576/3586/3689/4317/140885/6542/7099/7124	11
Turquoise	BP	GO:0032655	regulation of interleukin-12 production	7/555	50/18493	0.000688531	0.0112032	0.00903155	708/948/3586/11213/3663/10859/7099	7
Turquoise	BP	GO:0032418	lysosome localization	8/555	65/18493	0.000701645	0.0113367	0.00913921	695/11314/2207/2268/3815/7462/5293/5880	8
Turquoise	BP	GO:0034121	regulation of toll-like receptor signaling pathway	8/555	65/18493	0.000701645	0.0113367	0.00913921	11314/948/11213/3929/55366/9258/7099/7128	8
Turquoise	BP	GO:0042129	regulation of T cell proliferation	13/555	153/18493	0.000723474	0.0116082	0.0093581	641/6352/729230/923/3586/3606/10859/3071/5588/5880/54440/6693/6777	13
Turquoise	BP	GO:0051262	protein tetramerization	13/555	153/18493	0.000723474	0.0116082	0.0093581	32/220/226/25776/6352/919/51181/3028/3615/3848/5092/6223/7053	13
Turquoise	BP	GO:0038083	peptidyl-tyrosine autophosphorylation	6/555	37/18493	0.000748701	0.0119714	0.00965089	695/2268/3702/5747/6503/7525	6
Turquoise	BP	GO:0150077	regulation of neuroinflammatory response	5/555	25/18493	0.000771947	0.0123006	0.00991623	3606/3684/3689/4317/7124	5
Turquoise	BP	GO:0007229	integrin-mediated signaling pathway	10/555	99/18493	0.000777382	0.0123446	0.00995173	683/57126/634/2207/2268/3684/3689/5341/5747/10451	10
Turquoise	BP	GO:0001505	regulation of neurotransmitter levels	22/555	346/18493	0.000812779	0.0128625	0.0103692	948/1138/1524/23576/2571/28964/2914/3586/3689/4317/5027/5037/55607/5579/9783/140885/6542/2054/8867/7099/7124/6843	22
Turquoise	BP	GO:0014065	phosphatidylinositol 3-kinase signaling	12/555	136/18493	0.000821712	0.0129595	0.0104474	708/6352/634/2268/3059/3606/3815/5293/8395/59338/5747/7124	12
Turquoise	BP	GO:0030852	regulation of granulocyte differentiation	4/555	15/18493	0.000841421	0.0130477	0.0105185	9370/634/3059/3635	4
Turquoise	BP	GO:0030889	negative regulation of B cell proliferation	4/555	15/18493	0.000841421	0.0130477	0.0105185	695/11314/3586/3635	4
Turquoise	BP	GO:0032695	negative regulation of interleukin-12 production	4/555	15/18493	0.000841421	0.0130477	0.0105185	708/3586/11213/10859	4
Turquoise	BP	GO:0034116	positive regulation of heterotypic cell-cell adhesion	4/555	15/18493	0.000841421	0.0130477	0.0105185	4680/3586/8631/7124	4
Turquoise	BP	GO:0044144	modulation of growth of symbiont involved in interaction with host	4/555	15/18493	0.000841421	0.0130477	0.0105185	948/3586/3929/7124	4
Turquoise	BP	GO:0046849	bone remodeling	9/555	83/18493	0.000845669	0.0130697	0.0105363	952/1945/3635/55366/5027/5880/9770/7128/1200	9
Turquoise	BP	GO:0030032	lamellipodium assembly	8/555	67/18493	0.000860513	0.0132548	0.0106855	23191/64083/3815/10787/29780/5880/10451/7454	8
Turquoise	BP	GO:1903531	negative regulation of secretion by cell	15/555	196/18493	0.000872586	0.0133134	0.0107328	9370/308/22900/729230/11314/634/1149/3586/3625/55366/10859/55607/5734/7124/7128	15
Turquoise	BP	GO:0030195	negative regulation of blood coagulation	7/555	52/18493	0.000875847	0.0133134	0.0107328	308/634/2811/3848/5329/5055/5345	7
Turquoise	BP	GO:0032615	interleukin-12 production	7/555	52/18493	0.000875847	0.0133134	0.0107328	708/948/3586/11213/3663/10859/7099	7
Turquoise	BP	GO:1900047	negative regulation of hemostasis	7/555	52/18493	0.000875847	0.0133134	0.0107328	308/634/2811/3848/5329/5055/5345	7
Turquoise	BP	GO:0043900	regulation of multi-organism process	23/555	371/18493	0.000879828	0.0133301	0.0107462	9447/708/22900/6352/948/27243/10519/3586/3625/3929/10859/4282/5027/5551/2040/6954/7113/7124/7128/10758/10107/6737/10269	23
Turquoise	BP	GO:0006959	humoral immune response	22/555	349/18493	0.000909881	0.0137404	0.011077	683/708/717/727/728/729/729230/930/2919/9156/10578/8344/85236/3848/5197/5450/5657/6156/6223/4068/7124/10758	22
Turquoise	BP	GO:0038094	Fc-gamma receptor signaling pathway	12/555	138/18493	0.000934634	0.0140682	0.0113412	919/23191/2207/2268/10787/3071/5336/5747/10451/7454/7456/7525	12
Turquoise	BP	GO:0006612	protein targeting to membrane	15/555	198/18493	0.000967685	0.0145184	0.0117042	10519/3684/3689/4736/6136/6141/6159/6156/6165/6132/6205/6223/6193/10952/2040	15
Turquoise	BP	GO:0034101	erythrocyte homeostasis	11/555	120/18493	0.00097814	0.0146278	0.0117923	272/2623/3059/10320/3635/3815/9258/3071/6223/6777/10107	11
Turquoise	BP	GO:0032722	positive regulation of chemokine production	7/555	53/18493	0.00098345	0.0146293	0.0117936	9370/727/3929/4155/4282/7099/7124	7
Turquoise	BP	GO:0042098	T cell proliferation	14/555	178/18493	0.000984575	0.0146293	0.0117936	641/6352/729230/923/3586/3606/10859/3071/5027/5588/5880/54440/6693/6777	14
Turquoise	BP	GO:0032386	regulation of intracellular transport	25/555	422/18493	0.00102302	0.0151519	0.0122148	9370/11314/948/999/1138/10519/1778/10938/2207/2268/28964/3059/89781/3684/3689/9141/5579/5880/9783/6672/2040/6843/7531/23144/79752	25
Turquoise	BP	GO:0006801	superoxide metabolic process	8/555	69/18493	0.00104702	0.0154085	0.0124217	683/57126/948/51167/1536/3684/3689/7124	8
Turquoise	BP	GO:0010517	regulation of phospholipase activity	8/555	69/18493	0.00104702	0.0154085	0.0124217	627/728/6352/2769/3702/3815/5590/8698	8
Turquoise	BP	GO:0002431	Fc receptor mediated stimulatory signaling pathway	12/555	140/18493	0.00106019	0.0155528	0.0125381	919/23191/2207/2268/10787/3071/5336/5747/10451/7454/7456/7525	12
Turquoise	BP	GO:0033033	negative regulation of myeloid cell apoptotic process	4/555	16/18493	0.00109544	0.0159686	0.0128732	6352/23601/2207/4282	4
Turquoise	BP	GO:0051127	positive regulation of actin nucleation	4/555	16/18493	0.00109544	0.0159686	0.0128732	23191/10787/7454/7456	4
Turquoise	BP	GO:0042542	response to hydrogen peroxide	12/555	141/18493	0.00112804	0.0163407	0.0131732	358/664/51022/3586/9688/5111/59338/5831/140885/6778/7128/7225	12
Turquoise	BP	GO:0045807	positive regulation of endocytosis	12/555	141/18493	0.00112804	0.0163407	0.0131732	10347/717/948/2207/3684/3071/23327/5336/140885/55423/8867/7124	12
Turquoise	BP	GO:0034122	negative regulation of toll-like receptor signaling pathway	6/555	40/18493	0.0011457	0.0165446	0.0133376	11314/11213/55366/9258/7099/7128	6
Turquoise	BP	GO:0060193	positive regulation of lipase activity	8/555	70/18493	0.00115167	0.016579	0.0133653	627/728/6352/2769/3702/3815/5590/8698	8
Turquoise	BP	GO:0051224	negative regulation of protein transport	14/555	181/18493	0.00115708	0.0166051	0.0133864	9370/308/22900/948/1149/3586/3625/55366/10859/10434/5734/6672/7124/7128	14
Turquoise	BP	GO:1901605	alpha-amino acid metabolic process	16/555	223/18493	0.00118484	0.016951	0.0136652	191/5832/420/790/23576/58478/2571/2628/3034/4482/4953/5092/5831/256987/6611/6777	16
Turquoise	BP	GO:1902107	positive regulation of leukocyte differentiation	12/555	142/18493	0.00119945	0.017107	0.013791	695/3059/3606/3575/3635/3071/5590/864/54440/6777/7124/8876	12
Turquoise	BP	GO:0000302	response to reactive oxygen species	16/555	224/18493	0.00124159	0.0176535	0.0142315	358/664/695/890/948/51022/3586/9688/5111/59338/5831/140885/6778/7124/7128/7225	16
Turquoise	BP	GO:0050864	regulation of B cell activation	14/555	183/18493	0.00128561	0.0181515	0.014633	683/695/11314/952/3586/3635/4282/3071/54440/6777/6778/7099/7128/10451	14
Turquoise	BP	GO:1903708	positive regulation of hemopoiesis	14/555	183/18493	0.00128561	0.0181515	0.014633	695/2623/3059/3606/3575/3635/182/3071/5590/864/54440/6777/7124/8876	14
Turquoise	BP	GO:0031341	regulation of cell killing	9/555	88/18493	0.0012884	0.0181515	0.014633	634/1776/51571/3575/10859/5027/5551/4068/6777	9
Turquoise	BP	GO:0017157	regulation of exocytosis	15/555	204/18493	0.00130715	0.0183596	0.0148008	729230/57126/11314/634/27243/1138/2207/2268/28964/3684/3689/5579/5880/9783/6843	15
Turquoise	BP	GO:0043244	regulation of protein complex disassembly	10/555	106/18493	0.00131949	0.0184546	0.0148773	119/9181/664/10519/11213/5341/6710/7111/7124/10269	10
Turquoise	BP	GO:0032692	negative regulation of interleukin-1 production	5/555	28/18493	0.00132589	0.0184546	0.0148773	22900/634/1524/3586/7128	5
Turquoise	BP	GO:0042730	fibrinolysis	5/555	28/18493	0.00132589	0.0184546	0.0148773	2811/3848/5329/5055/5345	5
Turquoise	BP	GO:0050701	interleukin-1 secretion	7/555	56/18493	0.00136966	0.0189497	0.0152765	9447/22900/834/948/5027/7099/7128	7
Turquoise	BP	GO:0050819	negative regulation of coagulation	7/555	56/18493	0.00136966	0.0189497	0.0152765	308/634/2811/3848/5329/5055/5345	7
Turquoise	BP	GO:0045637	regulation of myeloid cell differentiation	17/555	248/18493	0.0013892	0.0190108	0.0153257	9370/634/10519/2623/2811/3059/3635/182/10859/4211/3071/5579/5588/9770/6777/7099/7124	17
Turquoise	BP	GO:0044117	growth of symbiont in host	4/555	17/18493	0.00139876	0.0190108	0.0153257	948/3586/3929/7124	4
Turquoise	BP	GO:0061081	positive regulation of myeloid leukocyte cytokine production involved in immune response	4/555	17/18493	0.00139876	0.0190108	0.0153257	948/2207/4282/7099	4
Turquoise	BP	GO:0061318	renal filtration cell differentiation	4/555	17/18493	0.00139876	0.0190108	0.0153257	9370/182/9688/8842	4
Turquoise	BP	GO:0072112	glomerular visceral epithelial cell differentiation	4/555	17/18493	0.00139876	0.0190108	0.0153257	9370/182/9688/8842	4
Turquoise	BP	GO:1903978	regulation of microglial cell activation	4/555	17/18493	0.00139876	0.0190108	0.0153257	3684/3689/4317/7124	4
Turquoise	BP	GO:0009615	response to virus	20/555	315/18493	0.00140335	0.0190172	0.0153309	9447/664/708/6352/6387/2268/8517/11213/3663/10859/1130/4953/11040/5551/8575/256987/7124/7128/10758/10269	20
Turquoise	BP	GO:0006509	membrane protein ectodomain proteolysis	6/555	42/18493	0.00148855	0.0198231	0.0159806	5045/3586/5027/5588/5657/7124	6
Turquoise	BP	GO:0010863	positive regulation of phospholipase C activity	6/555	42/18493	0.00148855	0.0198231	0.0159806	627/728/2769/3702/3815/8698	6
Turquoise	BP	GO:0042088	T-helper 1 type immune response	6/555	42/18493	0.00148855	0.0198231	0.0159806	729230/3606/64218/6693/6778/7099	6
Turquoise	BP	GO:0045429	positive regulation of nitric oxide biosynthetic process	6/555	42/18493	0.00148855	0.0198231	0.0159806	948/23576/3689/4317/7099/7124	6
Turquoise	BP	GO:0050706	regulation of interleukin-1 beta secretion	6/555	42/18493	0.00148855	0.0198231	0.0159806	9447/22900/834/5027/7099/7128	6
Turquoise	BP	GO:1904407	positive regulation of nitric oxide metabolic process	6/555	42/18493	0.00148855	0.0198231	0.0159806	948/23576/3689/4317/7099/7124	6
Turquoise	BP	GO:0048145	regulation of fibroblast proliferation	9/555	90/18493	0.00151088	0.0200626	0.0161737	358/890/11314/4282/23515/26471/6277/8877/10269	9
Turquoise	BP	GO:0018108	peptidyl-tyrosine phosphorylation	23/555	387/18493	0.00153595	0.0203371	0.0163949	9370/9181/627/683/695/6352/11314/948/8798/2268/2623/3059/3606/3689/3702/3815/4282/5590/5747/6503/6777/7060/7525	23
Turquoise	BP	GO:0050718	positive regulation of interleukin-1 beta secretion	5/555	29/18493	0.00156306	0.0205196	0.016542	9447/22900/834/5027/7099	5
Turquoise	BP	GO:0050869	negative regulation of B cell activation	5/555	29/18493	0.00156306	0.0205196	0.016542	695/11314/3586/3635/7128	5
Turquoise	BP	GO:0090200	positive regulation of release of cytochrome c from mitochondria	5/555	29/18493	0.00156306	0.0205196	0.016542	664/27141/64112/9141/5329	5
Turquoise	BP	GO:0019216	regulation of lipid metabolic process	23/555	388/18493	0.00158815	0.02079	0.01676	32/9370/64919/948/634/1149/8721/2053/2268/50486/9453/51280/3417/3815/8800/5747/6319/10580/6777/30968/7124/10451/10269	23
Turquoise	BP	GO:0048144	fibroblast proliferation	9/555	91/18493	0.00163315	0.0213186	0.0171862	358/890/11314/4282/23515/26471/6277/8877/10269	9
Turquoise	BP	GO:0002576	platelet degranulation	11/555	128/18493	0.00165569	0.0215519	0.0173743	226/308/948/2162/10447/51571/2207/22915/5341/5345/51368	11
Turquoise	BP	GO:0042267	natural killer cell mediated cytotoxicity	7/555	58/18493	0.0016867	0.021894	0.01765	634/3002/3606/10859/1130/4068/6777	7
Turquoise	BP	GO:0018212	peptidyl-tyrosine modification	23/555	390/18493	0.00169712	0.0219675	0.0177093	9370/9181/627/683/695/6352/11314/948/8798/2268/2623/3059/3606/3689/3702/3815/4282/5590/5747/6503/6777/7060/7525	23
Turquoise	BP	GO:0042133	neurotransmitter metabolic process	12/555	148/18493	0.00171097	0.0220849	0.017804	948/1524/23576/2571/3586/3689/4317/5037/140885/6542/7099/7124	12
Turquoise	BP	GO:0044110	growth involved in symbiotic interaction	4/555	18/18493	0.00175609	0.0224789	0.0181216	948/3586/3929/7124	4
Turquoise	BP	GO:0044116	growth of symbiont involved in interaction with host	4/555	18/18493	0.00175609	0.0224789	0.0181216	948/3586/3929/7124	4
Turquoise	BP	GO:0072311	glomerular epithelial cell differentiation	4/555	18/18493	0.00175609	0.0224789	0.0181216	9370/182/9688/8842	4
Turquoise	BP	GO:0019932	second-messenger-mediated signaling	25/555	439/18493	0.00176253	0.022499	0.0181378	358/683/695/845/729230/948/10519/1524/23576/9451/2357/7462/55366/5027/5037/5336/5341/55607/5734/10900/8698/8877/6954/7124/10269	25
Turquoise	BP	GO:0007162	negative regulation of cell adhesion	18/555	276/18493	0.00177834	0.0226383	0.0182501	9370/11314/999/634/6387/4072/53827/3586/3557/182/54900/10859/4155/5747/864/10653/6693/4070	18
Turquoise	BP	GO:0002526	acute inflammatory response	15/555	211/18493	0.00182448	0.0231047	0.0186261	695/708/717/727/728/729/930/923/1776/2207/3929/26471/5345/7124/8876	15
Turquoise	BP	GO:0007202	activation of phospholipase C activity	5/555	30/18493	0.00182998	0.0231047	0.0186261	627/728/2769/3702/8698	5
Turquoise	BP	GO:0010543	regulation of platelet activation	5/555	30/18493	0.00182998	0.0231047	0.0186261	634/2207/5341/5588/7099	5
Turquoise	BP	GO:0010803	regulation of tumor necrosis factor-mediated signaling pathway	7/555	59/18493	0.00186521	0.0234775	0.0189266	9370/22900/834/8517/8877/7124/7128	7
Turquoise	BP	GO:0030218	erythrocyte differentiation	10/555	111/18493	0.00186966	0.0234775	0.0189266	2623/3059/10320/3635/3815/9258/3071/6223/6777/10107	10
Turquoise	BP	GO:0052548	regulation of endopeptidase activity	24/555	417/18493	0.0018796	0.0235383	0.0189756	9447/317/358/332/727/22900/834/27141/1476/1718/9451/5045/4155/51079/9141/5037/5329/6906/5055/5271/5345/10653/7124/7531	24
Turquoise	BP	GO:1900274	regulation of phospholipase C activity	6/555	44/18493	0.0019044	0.0237845	0.0191741	627/728/2769/3702/3815/8698	6
Turquoise	BP	GO:0052547	regulation of peptidase activity	25/555	442/18493	0.00193207	0.024065	0.0194002	9447/317/358/332/727/22900/834/27141/1476/1718/9451/5045/4155/51079/26577/9141/5037/5329/6906/5055/5271/5345/10653/7124/7531	25
Turquoise	BP	GO:0006520	cellular amino acid metabolic process	20/555	324/18493	0.00195769	0.024308	0.0195961	191/5832/420/790/23576/58478/2571/2628/3034/3028/4482/4953/5092/5464/5831/256987/6542/8140/6611/6777	20
Turquoise	BP	GO:0001910	regulation of leukocyte mediated cytotoxicity	8/555	76/18493	0.00196736	0.024308	0.0195961	634/1776/51571/3575/10859/5027/4068/6777	8
Turquoise	BP	GO:0034109	homotypic cell-cell adhesion	8/555	76/18493	0.00196736	0.024308	0.0195961	6352/634/1829/1832/2623/2811/5341/5588	8
Turquoise	BP	GO:1903426	regulation of reactive oxygen species biosynthetic process	9/555	94/18493	0.00204821	0.0252395	0.020347	948/1524/23576/3586/3689/4317/140885/7099/7124	9
Turquoise	BP	GO:0032388	positive regulation of intracellular transport	15/555	214/18493	0.00209339	0.0257276	0.0207405	999/10519/1778/10938/2207/2268/3059/89781/3684/3689/9141/5880/2040/7531/79752	15
Turquoise	BP	GO:0032689	negative regulation of interferon-gamma production	5/555	31/18493	0.00212879	0.0260555	0.0210049	708/10225/3586/10859/7099	5
Turquoise	BP	GO:0032479	regulation of type I interferon production	10/555	113/18493	0.00213595	0.0260555	0.0210049	3586/3663/10859/5336/140885/6778/7099/7128/6737/81030	10
Turquoise	BP	GO:0002704	negative regulation of leukocyte mediated immunity	6/555	45/18493	0.00214263	0.0260555	0.0210049	729230/11314/10225/634/3575/10859	6
Turquoise	BP	GO:0032653	regulation of interleukin-10 production	6/555	45/18493	0.00214263	0.0260555	0.0210049	2207/10859/4317/5590/54440/7099	6
Turquoise	BP	GO:0034104	negative regulation of tissue remodeling	4/555	19/18493	0.0021721	0.0263445	0.0212379	952/3635/5027/7128	4
Turquoise	BP	GO:0060191	regulation of lipase activity	9/555	95/18493	0.00220386	0.0266598	0.0214921	627/728/6352/5045/2769/3702/3815/5590/8698	9
Turquoise	BP	GO:0006413	translational initiation	14/555	194/18493	0.00222516	0.0268471	0.0216431	6352/9086/9451/4736/6136/6141/6159/6156/6165/6132/6205/6223/6193/7124	14
Turquoise	BP	GO:0032606	type I interferon production	10/555	114/18493	0.0022801	0.0274384	0.0221197	3586/3663/10859/5336/140885/6778/7099/7128/6737/81030	10
Turquoise	BP	GO:0071260	cellular response to mechanical stimulus	8/555	78/18493	0.00232235	0.0278742	0.0224711	358/664/834/1265/4055/5734/6513/7099	8
Turquoise	BP	GO:0045824	negative regulation of innate immune response	6/555	46/18493	0.00240265	0.0287634	0.0231879	10225/634/11213/10859/6223/7128	6
Turquoise	BP	GO:0006739	NADP metabolic process	5/555	32/18493	0.00246165	0.0293935	0.0236959	51181/2327/3417/65220/22934	5
Turquoise	BP	GO:0002433	immune response-regulating cell surface receptor signaling pathway involved in phagocytosis	11/555	135/18493	0.00252588	0.0299284	0.0241271	919/23191/2268/10787/3071/5336/5747/10451/7454/7456/7525	11
Turquoise	BP	GO:0038096	Fc-gamma receptor signaling pathway involved in phagocytosis	11/555	135/18493	0.00252588	0.0299284	0.0241271	919/23191/2268/10787/3071/5336/5747/10451/7454/7456/7525	11
Turquoise	BP	GO:0072655	establishment of protein localization to mitochondrion	11/555	135/18493	0.00252588	0.0299284	0.0241271	80273/3002/89781/64112/51079/9141/10531/5880/9804/7531/10971	11
Turquoise	BP	GO:0042102	positive regulation of T cell proliferation	9/555	97/18493	0.00254335	0.0300584	0.0242318	641/6352/729230/923/3606/3071/5588/54440/6777	9
Turquoise	BP	GO:0006839	mitochondrial transport	16/555	241/18493	0.0026181	0.0308629	0.0248804	32/664/80273/3002/89781/64112/10651/51079/9141/10531/5880/30968/28978/9804/7531/10971	16
Turquoise	BP	GO:0032495	response to muramyl dipeptide	4/555	20/18493	0.00265137	0.0310964	0.0250687	9181/3663/182/7128	4
Turquoise	BP	GO:0033630	positive regulation of cell adhesion mediated by integrin	4/555	20/18493	0.00265137	0.0310964	0.0250687	6352/10519/3071/8631	4
Turquoise	BP	GO:0032613	interleukin-10 production	6/555	47/18493	0.00268571	0.0313645	0.0252848	2207/10859/4317/5590/54440/7099	6
Turquoise	BP	GO:0005996	monosaccharide metabolic process	18/555	287/18493	0.00271759	0.0313645	0.0252848	32/9370/10327/226/51181/10447/2526/4122/4123/5372/22934/27230/6513/6515/10580/7124/7167/10269	18
Turquoise	BP	GO:2000379	positive regulation of reactive oxygen species metabolic process	9/555	98/18493	0.00272797	0.0313645	0.0252848	57126/948/23576/3684/3689/4317/55022/7099/7124	9
Turquoise	BP	GO:0032729	positive regulation of interferon-gamma production	7/555	63/18493	0.00272983	0.0313645	0.0252848	729230/914/51571/3606/54440/7099/7124	7
Turquoise	BP	GO:0019722	calcium-mediated signaling	15/555	220/18493	0.00273059	0.0313645	0.0252848	683/695/845/729230/10519/1524/9451/7462/5027/5336/5341/55607/8877/7124/10269	15
Turquoise	BP	GO:0045765	regulation of angiogenesis	22/555	381/18493	0.0027422	0.0313645	0.0252848	358/727/728/729/729230/634/10519/1524/1536/23576/29924/9982/3087/3586/3689/3848/5579/64218/6672/8877/7060/7128	22
Turquoise	BP	GO:0002679	respiratory burst involved in defense response	3/555	10/18493	0.00275568	0.0313645	0.0252848	3929/5293/6223	3
Turquoise	BP	GO:0002863	positive regulation of inflammatory response to antigenic stimulus	3/555	10/18493	0.00275568	0.0313645	0.0252848	695/2207/7124	3
Turquoise	BP	GO:0070391	response to lipoteichoic acid	3/555	10/18493	0.00275568	0.0313645	0.0252848	948/3929/7099	3
Turquoise	BP	GO:0071223	cellular response to lipoteichoic acid	3/555	10/18493	0.00275568	0.0313645	0.0252848	948/3929/7099	3
Turquoise	BP	GO:0071474	cellular hyperosmotic response	3/555	10/18493	0.00275568	0.0313645	0.0252848	358/9181/6513	3
Turquoise	BP	GO:0072672	neutrophil extravasation	3/555	10/18493	0.00275568	0.0313645	0.0252848	57126/5293/5657	3
Turquoise	BP	GO:0031647	regulation of protein stability	17/555	265/18493	0.00279419	0.0317247	0.0255752	433/482/825/10574/1022/54344/89781/79763/23515/23327/11040/8575/149628/9770/6788/6737/8975	17
Turquoise	BP	GO:0001914	regulation of T cell mediated cytotoxicity	5/555	33/18493	0.00283073	0.0317495	0.0255952	634/51571/3575/10859/5027	5
Turquoise	BP	GO:0032633	interleukin-4 production	5/555	33/18493	0.00283073	0.0317495	0.0255952	2207/3702/5588/5590/54440	5
Turquoise	BP	GO:0045730	respiratory burst	5/555	33/18493	0.00283073	0.0317495	0.0255952	1536/3929/5293/5880/6223	5
Turquoise	BP	GO:0070229	negative regulation of lymphocyte apoptotic process	5/555	33/18493	0.00283073	0.0317495	0.0255952	641/6352/3575/4282/5588	5
Turquoise	BP	GO:1905521	regulation of macrophage migration	5/555	33/18493	0.00283073	0.0317495	0.0255952	727/728/6352/1524/4282	5
Turquoise	BP	GO:0044282	small molecule catabolic process	24/555	431/18493	0.00288106	0.0322358	0.0259872	32/9370/191/10327/221/226/874/66002/4051/51181/23576/955/2526/2571/10007/3034/3028/3633/53343/5092/5264/8867/7167/1890	24
Turquoise	BP	GO:0072659	protein localization to plasma membrane	16/555	244/18493	0.00295958	0.0330343	0.0266309	9370/286/999/10519/245812/2207/64083/55204/10434/55022/5590/391/8631/10580/7124/10098	16
Turquoise	BP	GO:0051048	negative regulation of secretion	15/555	222/18493	0.00297561	0.0331332	0.0267107	9370/308/22900/729230/11314/634/1149/3586/3625/55366/10859/55607/5734/7124/7128	15
Turquoise	BP	GO:0050730	regulation of peptidyl-tyrosine phosphorylation	16/555	245/18493	0.00308128	0.0342274	0.0275927	9370/9181/627/683/6352/11314/948/2623/3059/3606/3689/3815/4282/5590/7060/7525	16
Turquoise	BP	GO:0070585	protein localization to mitochondrion	11/555	139/18493	0.00316934	0.0351065	0.0283015	80273/3002/89781/64112/51079/9141/10531/5880/9804/7531/10971	11
Turquoise	BP	GO:0002861	regulation of inflammatory response to antigenic stimulus	4/555	21/18493	0.00319841	0.0351065	0.0283015	695/2207/3586/7124	4
Turquoise	BP	GO:0035162	embryonic hemopoiesis	4/555	21/18493	0.00319841	0.0351065	0.0283015	2623/3815/10019/6788	4
Turquoise	BP	GO:0070233	negative regulation of T cell apoptotic process	4/555	21/18493	0.00319841	0.0351065	0.0283015	641/6352/3575/5588	4
Turquoise	BP	GO:0072010	glomerular epithelium development	4/555	21/18493	0.00319841	0.0351065	0.0283015	9370/182/9688/8842	4
Turquoise	BP	GO:0002701	negative regulation of production of molecular mediator of immune response	5/555	34/18493	0.0032382	0.0351261	0.0283173	10225/3586/11213/10859/7124	5
Turquoise	BP	GO:0046627	negative regulation of insulin receptor signaling pathway	5/555	34/18493	0.0032382	0.0351261	0.0283173	55022/5579/5588/5590/5791	5
Turquoise	BP	GO:0050716	positive regulation of interleukin-1 secretion	5/555	34/18493	0.0032382	0.0351261	0.0283173	9447/22900/834/5027/7099	5
Turquoise	BP	GO:1900077	negative regulation of cellular response to insulin stimulus	5/555	34/18493	0.0032382	0.0351261	0.0283173	55022/5579/5588/5590/5791	5
Turquoise	BP	GO:2000516	positive regulation of CD4-positive, alpha-beta T cell activation	5/555	34/18493	0.0032382	0.0351261	0.0283173	3606/3071/5588/5590/54440	5
Turquoise	BP	GO:0034504	protein localization to nucleus	17/555	269/18493	0.00325739	0.0352515	0.0284184	10347/10574/948/999/9451/3059/3087/10527/9258/23515/9688/4931/149628/10952/6672/7124/7531	17
Turquoise	BP	GO:0000184	nuclear-transcribed mRNA catabolic process, nonsense-mediated decay	10/555	120/18493	0.00331743	0.0357416	0.0288134	4736/6136/6141/6159/6156/6165/6132/6205/6223/6193	10
Turquoise	BP	GO:0050704	regulation of interleukin-1 secretion	6/555	49/18493	0.00332588	0.0357416	0.0288134	9447/22900/834/5027/7099/7128	6
Turquoise	BP	GO:0071349	cellular response to interleukin-12	6/555	49/18493	0.00332588	0.0357416	0.0288134	1265/3586/4282/5055/140885/6775	6
Turquoise	BP	GO:0002286	T cell activation involved in immune response	9/555	101/18493	0.0033461	0.0357924	0.0288544	634/2207/3606/10859/5590/5734/64218/6693/6778	9
Turquoise	BP	GO:1904659	glucose transmembrane transport	9/555	101/18493	0.0033461	0.0357924	0.0288544	9370/55022/5579/6513/6515/6518/10580/7124/7525	9
Turquoise	BP	GO:0046394	carboxylic acid biosynthetic process	23/555	412/18493	0.00338256	0.0360988	0.0291014	32/47/54988/9370/10327/5832/220/226/241/790/634/8560/58478/2053/2571/2628/4282/5027/5742/5831/6319/256987/7167	23
Turquoise	BP	GO:0045582	positive regulation of T cell differentiation	8/555	83/18493	0.00343093	0.0365307	0.0294496	3606/3575/3071/5590/864/54440/6777/8876	8
Turquoise	BP	GO:0032984	protein-containing complex disassembly	19/555	317/18493	0.00346878	0.0368488	0.029706	119/9181/54998/664/27243/10519/7818/11213/11004/65005/64963/51021/5341/6710/8867/7111/7124/79752/10269	19
Turquoise	BP	GO:0016053	organic acid biosynthetic process	23/555	413/18493	0.00348443	0.0369301	0.0297716	32/47/54988/9370/10327/5832/220/226/241/790/634/8560/58478/2053/2571/2628/4282/5027/5742/5831/6319/256987/7167	23
Turquoise	BP	GO:0008637	apoptotic mitochondrial changes	10/555	121/18493	0.00352193	0.0372422	0.0300231	664/27141/3002/64112/9141/11040/5329/28978/7531/10971	10
Turquoise	BP	GO:0002292	T cell differentiation involved in immune response	7/555	66/18493	0.00355829	0.0374553	0.0301949	2207/3606/5590/5734/64218/6693/6778	7
Turquoise	BP	GO:0019915	lipid storage	7/555	66/18493	0.00355829	0.0374553	0.0301949	32/948/1149/8291/10938/6777/7124	7
Turquoise	BP	GO:0046777	protein autophosphorylation	15/555	227/18493	0.00366831	0.037879	0.0305365	9370/695/790/9451/2268/2869/11213/3702/3815/11040/5747/9770/6503/10040/7525	15
Turquoise	BP	GO:0001913	T cell mediated cytotoxicity	6/555	50/18493	0.00368552	0.037879	0.0305365	634/51571/3575/10859/5027/5551	6
Turquoise	BP	GO:0070671	response to interleukin-12	6/555	50/18493	0.00368552	0.037879	0.0305365	1265/3586/4282/5055/140885/6775	6
Turquoise	BP	GO:0043094	cellular metabolic compound salvage	5/555	35/18493	0.00368624	0.037879	0.0305365	270/272/353/58478/1890	5
Turquoise	BP	GO:0071470	cellular response to osmotic stress	5/555	35/18493	0.00368624	0.037879	0.0305365	358/9181/825/8291/6513	5
Turquoise	BP	GO:0097581	lamellipodium organization	8/555	84/18493	0.00369498	0.037879	0.0305365	23191/64083/3815/10787/29780/5880/10451/7454	8
Turquoise	BP	GO:0006048	UDP-N-acetylglucosamine biosynthetic process	3/555	11/18493	0.00370511	0.037879	0.0305365	10007/5238/6675	3
Turquoise	BP	GO:0019852	L-ascorbic acid metabolic process	3/555	11/18493	0.00370511	0.037879	0.0305365	10327/6513/6515	3
Turquoise	BP	GO:0032494	response to peptidoglycan	3/555	11/18493	0.00370511	0.037879	0.0305365	728/11213/3663	3
Turquoise	BP	GO:0043301	negative regulation of leukocyte degranulation	3/555	11/18493	0.00370511	0.037879	0.0305365	729230/11314/634	3
Turquoise	BP	GO:0045919	positive regulation of cytolysis	3/555	11/18493	0.00370511	0.037879	0.0305365	3929/10859/5027	3
Turquoise	BP	GO:0072015	glomerular visceral epithelial cell development	3/555	11/18493	0.00370511	0.037879	0.0305365	9370/182/9688	3
Turquoise	BP	GO:0072567	chemokine (C-X-C motif) ligand 2 production	3/555	11/18493	0.00370511	0.037879	0.0305365	4155/4282/7124	3
Turquoise	BP	GO:0042742	defense response to bacterium	19/555	319/18493	0.00371344	0.0378803	0.0305376	728/11126/948/1053/2207/2268/10578/8344/85236/3586/3929/1130/5027/51316/6156/6223/6693/7099/7124	19
Turquoise	BP	GO:0010884	positive regulation of lipid storage	4/555	22/18493	0.00381758	0.0387269	0.0312201	32/948/1149/10938	4
Turquoise	BP	GO:0071677	positive regulation of mononuclear cell migration	4/555	22/18493	0.00381758	0.0387269	0.0312201	6352/729230/6387/7124	4
Turquoise	BP	GO:1904018	positive regulation of vasculature development	15/555	228/18493	0.00382157	0.0387269	0.0312201	358/727/728/729/634/10519/1524/1536/23576/9982/3586/3689/3815/5579/8877	15
Turquoise	BP	GO:0008154	actin polymerization or depolymerization	14/555	206/18493	0.00383463	0.0387742	0.0312582	119/6387/23191/8522/3059/10787/3071/5341/55607/9051/6710/7111/7454/7456	14
Turquoise	BP	GO:0043434	response to peptide hormone	23/555	417/18493	0.00391806	0.0395314	0.0318686	9370/308/353/9550/790/890/634/6387/1536/23191/3087/3586/3625/55022/5579/5588/5590/5747/5791/56729/6513/10580/6777	23
Turquoise	BP	GO:0048015	phosphatidylinositol-mediated signaling	12/555	164/18493	0.00399731	0.0401992	0.032407	708/6352/634/2268/3059/3606/3815/5293/8395/59338/5747/7124	12
Turquoise	BP	GO:0051098	regulation of binding	21/555	369/18493	0.00400165	0.0401992	0.032407	119/9370/627/65981/948/8721/2623/3001/3586/4242/4317/4931/5092/11040/5329/23228/5792/149628/6672/6788/10269	21
Turquoise	BP	GO:0097345	mitochondrial outer membrane permeabilization	6/555	51/18493	0.00407322	0.0408294	0.032915	664/3002/64112/28978/7531/10971	6
Turquoise	BP	GO:0050871	positive regulation of B cell activation	11/555	144/18493	0.00415212	0.0415097	0.0334635	683/695/952/3635/4282/3071/54440/6777/6778/7099/10451	11
Turquoise	BP	GO:0002755	MyD88-dependent toll-like receptor signaling pathway	5/555	36/18493	0.00417702	0.0415097	0.0334635	695/11314/948/11213/7099	5
Turquoise	BP	GO:0042092	type 2 immune response	5/555	36/18493	0.00417702	0.0415097	0.0334635	729230/3586/3606/5590/6778	5
Turquoise	BP	GO:2000008	regulation of protein localization to cell surface	5/555	36/18493	0.00417702	0.0415097	0.0334635	627/919/2207/23327/7124	5
Turquoise	BP	GO:0060759	regulation of response to cytokine stimulus	12/555	165/18493	0.00419699	0.0416187	0.0335513	9370/22900/834/6352/8517/3557/11213/8877/7099/7124/7128/81030	12
Turquoise	BP	GO:0046677	response to antibiotic	19/555	323/18493	0.00424587	0.0420132	0.0338694	9370/358/664/51167/1536/51022/3586/3779/9688/5111/5037/59338/5831/10287/140885/6778/7128/7225/7284	19
Turquoise	BP	GO:1901342	regulation of vasculature development	23/555	421/18493	0.00439601	0.0433057	0.0349113	358/727/728/729/729230/634/10519/1524/1536/23576/29924/9982/3087/3586/3689/3815/3848/5579/64218/6672/8877/7060/7128	23
Turquoise	BP	GO:0071900	regulation of protein serine/threonine kinase activity	26/555	496/18493	0.00440427	0.0433057	0.0349113	9370/641/727/728/8900/890/899/900/901/11314/1022/10519/2357/2914/3087/8517/10527/11213/3815/54900/4282/5027/6788/7099/7124/7128	26
Turquoise	BP	GO:0045619	regulation of lymphocyte differentiation	12/555	166/18493	0.0044046	0.0433057	0.0349113	695/914/3606/3575/3635/3071/639/5590/864/54440/6777/8876	12
Turquoise	BP	GO:0007015	actin filament organization	22/555	397/18493	0.00447175	0.0438134	0.0353206	119/226/9181/6387/23191/8522/3059/10787/3071/5341/55607/9051/5734/5880/391/5345/10580/6710/4070/7111/7454/7456	22
Turquoise	BP	GO:0033157	regulation of intracellular protein transport	15/555	232/18493	0.00448788	0.0438134	0.0353206	9370/948/999/10519/3059/89781/3684/3689/9141/5880/6672/2040/7531/23144/79752	15
Turquoise	BP	GO:0090329	regulation of DNA-dependent DNA replication	6/555	52/18493	0.00449027	0.0438134	0.0353206	641/8317/26271/30968/7013/10269	6
Turquoise	BP	GO:0002691	regulation of cellular extravasation	4/555	23/18493	0.00451313	0.0438134	0.0353206	683/729230/6387/5734	4
Turquoise	BP	GO:0009226	nucleotide-sugar biosynthetic process	4/555	23/18493	0.00451313	0.0438134	0.0353206	10007/5238/5372/6675	4
Turquoise	BP	GO:0032753	positive regulation of interleukin-4 production	4/555	23/18493	0.00451313	0.0438134	0.0353206	2207/5588/5590/54440	4
Turquoise	BP	GO:0014066	regulation of phosphatidylinositol 3-kinase signaling	9/555	106/18493	0.00461571	0.0446667	0.0360085	6352/634/2268/3059/3606/3815/8395/5747/7124	9
Turquoise	BP	GO:0048017	inositol lipid-mediated signaling	12/555	167/18493	0.00462036	0.0446667	0.0360085	708/6352/634/2268/3059/3606/3815/5293/8395/59338/5747/7124	12
Turquoise	BP	GO:0006874	cellular calcium ion homeostasis	24/555	448/18493	0.00467187	0.0450703	0.0363339	308/664/728/825/845/6352/729230/930/948/952/1524/6387/2053/2357/2769/5027/5336/5579/5734/8698/30968/54499/7225/7531	24
Turquoise	BP	GO:0009101	glycoprotein biosynthetic process	19/555	326/18493	0.00468538	0.0451065	0.0363631	10347/433/124583/54344/349152/2526/2591/2623/64083/4122/4242/5238/5372/6184/27230/51006/10402/27090/7903	19
Turquoise	BP	GO:0002551	mast cell chemotaxis	3/555	12/18493	0.00483087	0.0460278	0.0371057	3815/5293/5880	3
Turquoise	BP	GO:0002716	negative regulation of natural killer cell mediated immunity	3/555	12/18493	0.00483087	0.0460278	0.0371057	10225/634/10859	3
Turquoise	BP	GO:0006105	succinate metabolic process	3/555	12/18493	0.00483087	0.0460278	0.0371057	2571/6389/6777	3
Turquoise	BP	GO:0010935	regulation of macrophage cytokine production	3/555	12/18493	0.00483087	0.0460278	0.0371057	948/11213/7099	3
Turquoise	BP	GO:0072310	glomerular epithelial cell development	3/555	12/18493	0.00483087	0.0460278	0.0371057	9370/182/9688	3
Turquoise	BP	GO:0051897	positive regulation of protein kinase B signaling	12/555	168/18493	0.00484449	0.0460625	0.0371337	708/930/1524/3059/3606/6453/3815/9258/5293/5747/6788/7124	12
Turquoise	BP	GO:0001776	leukocyte homeostasis	8/555	88/18493	0.00491152	0.0466039	0.0375702	729230/2207/4282/3071/5027/5293/6777/7128	8
Turquoise	BP	GO:0031529	ruffle organization	6/555	53/18493	0.00493795	0.0466314	0.0375924	23191/5341/59338/391/26751/4070	6
Turquoise	BP	GO:0070265	necrotic cell death	6/555	53/18493	0.00493795	0.0466314	0.0375924	9181/664/5836/7099/114908/7124	6
Turquoise	BP	GO:0014068	positive regulation of phosphatidylinositol 3-kinase signaling	7/555	70/18493	0.00494469	0.0466314	0.0375924	6352/2268/3059/3606/3815/5747/7124	7
Turquoise	BP	GO:0032102	negative regulation of response to external stimulus	19/555	329/18493	0.00516175	0.0485793	0.0391627	9370/308/708/727/22900/634/2811/3586/3848/9258/4282/5329/5734/6223/64218/5055/5345/140885/7128	19
Turquoise	BP	GO:0008645	hexose transmembrane transport	9/555	108/18493	0.00521747	0.0489402	0.0394536	9370/55022/5579/6513/6515/6518/10580/7124/7525	9
Turquoise	BP	GO:0050709	negative regulation of protein secretion	10/555	128/18493	0.00524873	0.0489402	0.0394536	308/22900/1149/3586/3625/55366/10859/5734/7124/7128	10
Turquoise	BP	GO:0051604	protein maturation	21/555	378/18493	0.0052551	0.0489402	0.0394536	708/717/727/728/729/22900/834/930/27141/1362/1510/5045/51218/3633/64110/5027/5345/30968/7113/10098/10269	21
Turquoise	BP	GO:0032868	response to insulin	16/555	259/18493	0.00526574	0.0489402	0.0394536	9370/353/9550/790/634/23191/3586/3625/55022/5579/5588/5590/5791/56729/6513/10580	16
Turquoise	BP	GO:0046390	ribose phosphate biosynthetic process	16/555	259/18493	0.00526574	0.0489402	0.0394536	32/47/23305/226/270/272/353/790/3615/5027/55022/5836/6319/30968/6834/7167	16
Turquoise	BP	GO:0001783	B cell apoptotic process	4/555	24/18493	0.00528914	0.0489402	0.0394536	695/3586/4282/10758	4
Turquoise	BP	GO:0010758	regulation of macrophage chemotaxis	4/555	24/18493	0.00528914	0.0489402	0.0394536	727/728/6352/4282	4
Turquoise	BP	GO:0032800	receptor biosynthetic process	4/555	24/18493	0.00528914	0.0489402	0.0394536	9370/5045/3586/7124	4
Turquoise	BP	GO:0032731	positive regulation of interleukin-1 beta production	5/555	38/18493	0.00529541	0.0489402	0.0394536	9447/22900/834/5027/7099	5
Turquoise	BP	GO:0043242	negative regulation of protein complex disassembly	7/555	71/18493	0.00534721	0.049222	0.0396808	119/9181/10519/11213/6710/7111/7124	7
Turquoise	BP	GO:0061844	antimicrobial humoral immune response mediated by antimicrobial peptide	7/555	71/18493	0.00534721	0.049222	0.0396808	2919/10578/8344/85236/5197/6156/6223	7
Turquoise	BP	GO:0034394	protein localization to cell surface	6/555	54/18493	0.00541754	0.0497703	0.0401228	627/57126/919/2207/23327/7124	6
Turquoise	CC	GO:0035579	specific granule membrane	23/571	91/19659	9.65549e-16	4.244e-13	3.60435e-13	221/683/57126/948/22918/634/1084/23601/1536/8560/2204/3684/3689/3903/9761/64386/4973/5329/6515/6518/353189/2040/6843	23
Turquoise	CC	GO:0030667	secretory granule membrane	39/571	295/19659	2.40296e-15	4.244e-13	3.60435e-13	221/683/728/762/57126/11314/948/952/22918/634/1084/4680/23601/1536/8560/1832/2204/2207/2357/3684/3689/3903/4126/9761/64386/3071/4973/5329/391/6402/8778/140885/6515/6518/353189/2040/9145/6843/8876	39
Turquoise	CC	GO:0042581	specific granule	29/571	160/19659	2.41136e-15	4.244e-13	3.60435e-13	221/683/124583/57126/948/22918/634/1084/23601/1265/2919/1536/23191/8560/2204/3684/3689/3903/9761/64386/4317/4973/5329/56729/6515/6518/353189/2040/6843	29
Turquoise	CC	GO:0070820	tertiary granule	28/571	164/19659	3.55802e-14	4.69659e-12	3.98873e-12	226/124583/57126/11314/22918/634/23601/1265/1476/2919/1536/23191/1832/2204/2207/2357/3417/3684/3689/3903/4317/3071/4973/8778/140885/6515/2040/6843	28
Turquoise	CC	GO:0070821	tertiary granule membrane	17/571	73/19659	2.30316e-11	2.43214e-09	2.06557e-09	57126/11314/22918/634/23601/1536/2204/2207/3684/3689/3903/4973/8778/140885/6515/2040/6843	17
Turquoise	CC	GO:0101002	ficolin-1-rich granule	23/571	185/19659	4.65281e-09	4.09447e-07	3.47736e-07	47/226/272/317/124583/11314/22918/1476/1832/2204/2207/10875/2357/3417/3615/3689/3848/4282/3071/5836/8778/140885/6515	23
Turquoise	CC	GO:0098857	membrane microdomain	28/571	305/19659	8.75747e-08	6.60564e-06	5.61005e-06	119/695/57126/948/962/925/999/8291/79180/5045/5348/3635/3684/3689/7462/4118/4973/5590/5657/10287/8631/6513/10580/6778/2040/30968/7124/7416	28
Turquoise	CC	GO:0098589	membrane region	28/571	316/19659	1.83498e-07	1.21108e-05	1.02855e-05	119/695/57126/948/962/925/999/8291/79180/5045/5348/3635/3684/3689/7462/4118/4973/5590/5657/10287/8631/6513/10580/6778/2040/30968/7124/7416	28
Turquoise	CC	GO:0045121	membrane raft	27/571	304/19659	2.89993e-07	1.70129e-05	1.44488e-05	119/695/57126/948/962/925/999/79180/5045/5348/3635/3684/3689/7462/4118/4973/5590/5657/10287/8631/6513/10580/6778/2040/30968/7124/7416	27
Turquoise	CC	GO:0101003	ficolin-1-rich granule membrane	11/571	61/19659	1.26335e-06	6.67049e-05	5.66513e-05	11314/22918/1832/2204/2207/2357/3689/3071/8778/140885/6515	11
Turquoise	CC	GO:0060205	cytoplasmic vesicle lumen	27/571	338/19659	2.28534e-06	0.000106338	9.03109e-05	47/226/272/317/353/124583/1265/1476/2919/23191/1778/2162/10447/51571/2268/10578/3417/3615/4282/4317/22915/51316/5657/5836/56729/5345/51368	27
Turquoise	CC	GO:0031983	vesicle lumen	27/571	339/19659	2.41677e-06	0.000106338	9.03109e-05	47/226/272/317/353/124583/1265/1476/2919/23191/1778/2162/10447/51571/2268/10578/3417/3615/4282/4317/22915/51316/5657/5836/56729/5345/51368	27
Turquoise	CC	GO:0034774	secretory granule lumen	26/571	321/19659	2.72521e-06	0.000110685	9.40031e-05	47/226/272/317/353/124583/1265/1476/2919/23191/1778/2162/10447/51571/2268/3417/3615/4282/4317/22915/51316/5657/5836/56729/5345/51368	26
Turquoise	CC	GO:0042101	T cell receptor complex	6/571	17/19659	5.50827e-06	0.00020774	0.00017643	919/923/925/634/8631/30968	6
Turquoise	CC	GO:0044445	cytosolic part	21/571	250/19659	1.41975e-05	0.000499751	0.00042443	9447/317/22900/834/10574/9451/3046/3257/89781/8517/5579/4736/6136/6141/6159/6156/6165/6132/6205/6223/6193	21
Turquoise	CC	GO:0005925	focal adhesion	28/571	402/19659	1.9775e-05	0.000652575	0.000554221	308/83478/9181/1265/23191/28964/3689/10982/10787/29780/5329/5747/5880/391/4736/6136/6141/6156/6132/6205/6223/6193/10580/7145/7525/7531/10971/7739	28
Turquoise	CC	GO:0005924	cell-substrate adherens junction	28/571	405/19659	2.26168e-05	0.000702451	0.000596579	308/83478/9181/1265/23191/28964/3689/10982/10787/29780/5329/5747/5880/391/4736/6136/6141/6156/6132/6205/6223/6193/10580/7145/7525/7531/10971/7739	28
Turquoise	CC	GO:0030055	cell-substrate junction	28/571	409/19659	2.69822e-05	0.000791477	0.000672187	308/83478/9181/1265/23191/28964/3689/10982/10787/29780/5329/5747/5880/391/4736/6136/6141/6156/6132/6205/6223/6193/10580/7145/7525/7531/10971/7739	28
Turquoise	CC	GO:0009897	external side of plasma membrane	25/571	359/19659	5.47406e-05	0.00152121	0.00129194	308/762/729230/930/914/948/923/969/974/925/1524/6387/2207/2811/3560/3575/3684/3689/3815/10859/5027/6402/7099/114908/7124	25
Turquoise	CC	GO:0031252	cell leading edge	26/571	390/19659	8.04374e-05	0.00212355	0.00180349	10347/286/9181/57126/999/10519/23191/8291/2268/6453/10787/29780/5341/59338/55607/5590/9051/5747/5880/10235/6277/26751/8631/25800/2054/7456	26
Turquoise	CC	GO:1904724	tertiary granule lumen	8/571	55/19659	0.000176396	0.00442066	0.00375439	226/124583/1265/1476/2919/23191/3417/4317	8
Turquoise	CC	GO:0044853	plasma membrane raft	11/571	102/19659	0.000184194	0.00442066	0.00375439	119/57126/925/999/5348/3684/3689/4118/5657/8631/6513	11
Turquoise	CC	GO:0015629	actin cytoskeleton	29/571	483/19659	0.000198048	0.00454648	0.00386125	119/226/9181/999/1265/2268/8522/3996/4482/4632/4635/4650/10787/29780/10611/55607/5590/9051/5747/5880/6513/10580/6710/30968/7111/7454/7456/7525/7739	29
Turquoise	CC	GO:1904813	ficolin-1-rich granule lumen	12/571	124/19659	0.00026625	0.0058575	0.00497467	47/226/272/317/124583/1476/10875/3417/3615/3848/4282/5836	12
Turquoise	CC	GO:0016324	apical plasma membrane	21/571	308/19659	0.000282138	0.00595876	0.00506067	10327/358/482/762/948/634/4680/10519/66002/1829/4072/5348/182/4118/5590/8842/5747/6583/6513/6518/8140	21
Turquoise	CC	GO:0001772	immunological synapse	6/571	34/19659	0.000393292	0.00770427	0.0065431	923/3001/3002/5588/8631/30968	6
Turquoise	CC	GO:0001931	uropod	4/571	13/19659	0.00040856	0.00770427	0.0065431	683/8395/9051/6693	4
Turquoise	CC	GO:0031254	cell trailing edge	4/571	13/19659	0.00040856	0.00770427	0.0065431	683/8395/9051/6693	4
Turquoise	CC	GO:0022626	cytosolic ribosome	11/571	115/19659	0.000524617	0.00955164	0.00811204	9451/4736/6136/6141/6159/6156/6165/6132/6205/6223/6193	11
Turquoise	CC	GO:0045177	apical part of cell	23/571	373/19659	0.000613783	0.0108026	0.00917444	10327/358/482/728/762/948/634/4680/10519/66002/1829/4072/5348/182/4118/5037/5590/8842/5747/6583/6513/6518/8140	23
Turquoise	CC	GO:0005938	cell cortex	19/571	292/19659	0.000949314	0.016169	0.013732	999/1212/54874/2571/3996/4650/4691/23187/55607/5590/5747/391/9783/6513/6710/7111/7127/7454/7456	19
Turquoise	CC	GO:0000307	cyclin-dependent protein kinase holoenzyme complex	6/571	41/19659	0.00110734	0.0182711	0.0155173	8900/890/899/900/901/1022	6
Turquoise	CC	GO:0001726	ruffle	13/571	167/19659	0.00121284	0.0187046	0.0158855	10347/9181/10519/23191/2268/10787/5341/59338/10235/6277/26751/8631/7456	13
Turquoise	CC	GO:0030027	lamellipodium	14/571	188/19659	0.00122695	0.0187046	0.0158855	57126/999/10519/23191/8291/6453/10787/29780/55607/9051/5747/5880/25800/2054	14
Turquoise	CC	GO:0045120	pronucleus	4/571	17/19659	0.00123989	0.0187046	0.0158855	641/10951/890/6513	4
Turquoise	CC	GO:0044448	cell cortex part	13/571	168/19659	0.00128062	0.0187824	0.0159516	999/1212/3996/23187/55607/5590/9783/6513/6710/7111/7127/7454/7456	13
Turquoise	CC	GO:0031225	anchored component of membrane	13/571	169/19659	0.00135152	0.0192866	0.0163798	420/683/762/11126/57126/962/4680/1945/2811/64386/5329/8876/55350	13
Turquoise	CC	GO:0035577	azurophil granule membrane	7/571	58/19659	0.00140087	0.0193154	0.0164042	4680/2357/4126/353189/2040/9145/8876	7
Turquoise	CC	GO:0044391	ribosomal subunit	14/571	191/19659	0.0014267	0.0193154	0.0164042	7818/65005/64963/51021/4736/6136/6141/6159/6156/6165/6132/6205/6223/6193	14
Turquoise	CC	GO:0031253	cell projection membrane	20/571	334/19659	0.00192129	0.0242932	0.0206318	10347/286/358/9181/762/948/634/10519/1212/10938/2268/10787/5329/5341/59338/8842/10235/6094/26751/25800	20
Turquoise	CC	GO:0005766	primary lysosome	12/571	155/19659	0.00193241	0.0242932	0.0206318	47/4680/1778/2357/4126/51316/5657/56729/353189/2040/9145/8876	12
Turquoise	CC	GO:0042582	azurophil granule	12/571	155/19659	0.00193241	0.0242932	0.0206318	47/4680/1778/2357/4126/51316/5657/56729/353189/2040/9145/8876	12
Turquoise	CC	GO:0022625	cytosolic large ribosomal subunit	7/571	63/19659	0.0022764	0.0279521	0.0237392	4736/6136/6141/6159/6156/6165/6132	7
Turquoise	CC	GO:0005884	actin filament	9/571	99/19659	0.00235381	0.0282457	0.0239886	8522/4650/10787/9051/5880/7111/7454/7456/7525	9
Turquoise	CC	GO:0030863	cortical cytoskeleton	9/571	102/19659	0.00288586	0.0338608	0.0287573	999/3996/55607/9783/6513/6710/7111/7454/7456	9
Turquoise	CC	GO:0005840	ribosome	17/571	276/19659	0.00305367	0.0350508	0.029768	54998/7818/9451/65005/64963/51021/4736/6136/6141/6159/6156/6165/6132/6205/6223/6193/27230	17
Turquoise	CC	GO:0042629	mast cell granule	4/571	22/19659	0.00339682	0.03816	0.0324086	695/3815/7462/5293	4
Turquoise	CC	GO:0042470	melanosome	9/571	106/19659	0.0037382	0.0398405	0.0338358	191/89781/6184/6513/2040/9145/6856/1200/7531	9
Turquoise	CC	GO:0048770	pigment granule	9/571	106/19659	0.0037382	0.0398405	0.0338358	191/89781/6184/6513/2040/9145/6856/1200/7531	9
Turquoise	CC	GO:1902554	serine/threonine protein kinase complex	8/571	87/19659	0.00377277	0.0398405	0.0338358	8900/890/899/900/901/1022/8517/5255	8
Turquoise	CC	GO:1902911	protein kinase complex	9/571	107/19659	0.00397932	0.0411977	0.0349885	8900/890/899/900/901/1022/8517/5255/10580	9
Turquoise	MF	GO:0030246	carbohydrate binding	26/546	269/17632	3.06919e-07	0.000236635	0.000221628	226/80216/433/969/22918/51266/29121/23601/64581/81035/2591/3820/3848/4122/4123/4126/9761/4973/5264/5836/22934/6402/8778/6515/6518/6675	26
Turquoise	MF	GO:0016799	hydrolase activity, hydrolyzing N-glycosyl compounds	6/546	21/17632	3.13003e-05	0.0120663	0.011301	683/952/4122/55247/4913/5111	6
Red	CC	GO:0005925	focal adhesion	9/50	402/19659	6.82365e-07	4.49023e-05	3.39981e-05	975/57175/9815/2783/3728/5034/6122/6208/6385	9
Red	CC	GO:0005924	cell-substrate adherens junction	9/50	405/19659	7.25932e-07	4.49023e-05	3.39981e-05	975/57175/9815/2783/3728/5034/6122/6208/6385	9
Red	CC	GO:0030055	cell-substrate junction	9/50	409/19659	7.87761e-07	4.49023e-05	3.39981e-05	975/57175/9815/2783/3728/5034/6122/6208/6385	9
Red	CC	GO:0016327	apicolateral plasma membrane	3/50	18/19659	1.22968e-05	0.000525689	0.000398029	1365/3728/3856	3
Red	CC	GO:0030176	integral component of endoplasmic reticulum membrane	4/50	149/19659	0.000556683	0.0190385	0.0144151	10134/51604/29927/7108	4
Red	CC	GO:0031227	intrinsic component of endoplasmic reticulum membrane	4/50	157/19659	0.000677474	0.019308	0.0146192	10134/51604/29927/7108	4
Red	CC	GO:0043034	costamere	2/50	19/19659	0.00105451	0.0257601	0.0195044	3856/6385	2
Red	CC	GO:0044449	contractile fiber part	4/50	214/19659	0.00212506	0.0392821	0.0297427	3728/3856/6385/10273	4
Red	CC	GO:0030016	myofibril	4/50	218/19659	0.0022727	0.0392821	0.0297427	3728/3856/6385/10273	4
Red	CC	GO:0030867	rough endoplasmic reticulum membrane	2/50	28/19659	0.0022972	0.0392821	0.0297427	10134/29927	2
Red	CC	GO:0043292	contractile fiber	4/50	229/19659	0.00271497	0.0422054	0.0319561	3728/3856/6385/10273	4
Green	BP	GO:0140014	mitotic nuclear division	24/54	277/18493	5.581e-30	7.29437e-27	5.70437e-27	6790/9212/9133/991/1063/9787/9700/3832/9585/24137/9735/4288/64151/10403/51203/9055/9232/26255/29127/10592/10051/10460/22974/7272	24
Green	BP	GO:0000280	nuclear division	26/54	416/18493	6.9033e-29	4.51131e-26	3.52795e-26	259266/6790/9212/9133/991/1063/9787/9700/3832/9585/24137/9735/4288/64151/10403/51203/9055/9232/26255/29127/10592/10051/10460/7153/22974/7272	26
Green	BP	GO:0048285	organelle fission	26/54	458/18493	8.51734e-28	3.71072e-25	2.90187e-25	259266/6790/9212/9133/991/1063/9787/9700/3832/9585/24137/9735/4288/64151/10403/51203/9055/9232/26255/29127/10592/10051/10460/7153/22974/7272	26
Green	BP	GO:0000819	sister chromatid segregation	19/54	185/18493	5.31167e-25	1.73559e-22	1.35727e-22	9212/991/1063/9787/9700/2237/24137/64151/10403/51203/9055/9232/26255/29127/10592/10051/10460/7153/7272	19
Green	BP	GO:0007059	chromosome segregation	21/54	312/18493	9.44409e-24	2.46868e-21	1.93057e-21	9212/991/1063/9787/9700/2237/24137/4288/64151/10403/51203/11339/9055/9232/26255/29127/10592/10051/10460/7153/7272	21
Green	BP	GO:0000070	mitotic sister chromatid segregation	17/54	153/18493	5.8138e-23	1.26644e-20	9.90386e-21	9212/991/1063/9787/9700/24137/64151/10403/51203/9055/9232/26255/29127/10592/10051/10460/7272	17
Green	BP	GO:0098813	nuclear chromosome segregation	19/54	258/18493	3.40895e-22	6.36501e-20	4.97759e-20	9212/991/1063/9787/9700/2237/24137/64151/10403/51203/9055/9232/26255/29127/10592/10051/10460/7153/7272	19
Green	BP	GO:0007088	regulation of mitotic nuclear division	17/54	177/18493	7.52535e-22	1.22945e-19	9.61463e-20	6790/9212/9133/991/1063/9787/9700/3832/9585/9735/4288/10403/51203/9232/26255/10460/7272	17
Green	BP	GO:0051783	regulation of nuclear division	17/54	201/18493	6.88279e-21	9.99535e-19	7.8166e-19	6790/9212/9133/991/1063/9787/9700/3832/9585/9735/4288/10403/51203/9232/26255/10460/7272	17
Green	BP	GO:0007051	spindle organization	16/54	165/18493	1.20948e-20	1.5808e-18	1.23622e-18	259266/6790/9212/991/9700/29899/3832/24137/10403/5116/9055/29127/10460/22974/55521/7272	16
Green	BP	GO:1902850	microtubule cytoskeleton organization involved in mitosis	15/54	129/18493	1.34152e-20	1.59396e-18	1.24652e-18	6790/9212/991/9700/29899/3832/24137/10403/51203/5116/9055/29127/10460/22974/7272	15
Green	BP	GO:0051983	regulation of chromosome segregation	13/54	103/18493	2.08172e-18	2.26734e-16	1.77311e-16	9212/991/1063/9787/9700/2237/4288/10403/9232/26255/29127/10460/7272	13
Green	BP	GO:0007052	mitotic spindle organization	13/54	108/18493	3.96369e-18	3.98503e-16	3.11639e-16	6790/9212/991/29899/3832/24137/10403/5116/9055/29127/10460/22974/7272	13
Green	BP	GO:0033045	regulation of sister chromatid segregation	11/54	80/18493	4.00492e-16	3.73888e-14	2.92389e-14	9212/991/1063/9787/9700/2237/10403/9232/26255/10460/7272	11
Green	BP	GO:0010965	regulation of mitotic sister chromatid separation	10/54	57/18493	7.25706e-16	6.32332e-14	4.94499e-14	9212/991/1063/9787/9700/10403/9232/26255/10460/7272	10
Green	BP	GO:0051306	mitotic sister chromatid separation	10/54	60/18493	1.2588e-15	1.02828e-13	8.04143e-14	9212/991/1063/9787/9700/10403/9232/26255/10460/7272	10
Green	BP	GO:0051304	chromosome separation	11/54	89/18493	1.36927e-15	1.05273e-13	8.23258e-14	9212/991/1063/9787/9700/10403/9232/26255/10460/7153/7272	11
Green	BP	GO:1905818	regulation of chromosome separation	10/54	62/18493	1.7874e-15	1.29785e-13	1.01495e-13	9212/991/1063/9787/9700/10403/9232/26255/10460/7272	10
Green	BP	GO:0033047	regulation of mitotic sister chromatid segregation	10/54	68/18493	4.77094e-15	3.28191e-13	2.56653e-13	9212/991/1063/9787/9700/10403/9232/26255/10460/7272	10
Green	BP	GO:1901990	regulation of mitotic cell cycle phase transition	15/54	375/18493	1.28759e-13	8.41443e-12	6.58028e-12	6790/9212/991/1063/9787/51514/9700/2146/3161/9735/10403/5116/10733/22974/7272	15
Green	BP	GO:0033046	negative regulation of sister chromatid segregation	8/54	44/18493	5.02639e-13	2.98861e-11	2.33716e-11	9212/991/1063/9700/10403/9232/26255/7272	8
Green	BP	GO:1901987	regulation of cell cycle phase transition	15/54	412/18493	5.03055e-13	2.98861e-11	2.33716e-11	6790/9212/991/1063/9787/51514/9700/2146/3161/9735/10403/5116/10733/22974/7272	15
Green	BP	GO:0051985	negative regulation of chromosome segregation	8/54	45/18493	6.09964e-13	3.46619e-11	2.71064e-11	9212/991/1063/9700/10403/9232/26255/7272	8
Green	BP	GO:0000910	cytokinesis	11/54	163/18493	1.22515e-12	6.67198e-11	5.21765e-11	6790/9212/26586/9700/10112/9585/24137/51203/9055/29127/55521	11
Green	BP	GO:0090068	positive regulation of cell cycle process	13/54	286/18493	1.38695e-12	7.25098e-11	5.67044e-11	6790/9212/9787/51514/9700/2146/2237/29899/9585/10403/51203/10733/29127	13
Green	BP	GO:0007091	metaphase/anaphase transition of mitotic cell cycle	8/54	54/18493	2.88612e-12	1.45083e-10	1.13459e-10	9212/991/1063/9787/9700/10403/10460/7272	8
Green	BP	GO:0044784	metaphase/anaphase transition of cell cycle	8/54	56/18493	3.92284e-12	1.89895e-10	1.48502e-10	9212/991/1063/9787/9700/10403/10460/7272	8
Green	BP	GO:0045787	positive regulation of cell cycle	14/54	390/18493	4.11956e-12	1.92295e-10	1.50379e-10	6790/9212/9133/9787/51514/9700/2146/2237/29899/9585/10403/51203/10733/29127	14
Green	BP	GO:0033044	regulation of chromosome organization	13/54	330/18493	8.44013e-12	3.80388e-10	2.97472e-10	9212/991/1063/9787/9700/2237/4288/10403/9232/26255/10460/7153/7272	13
Green	BP	GO:0061640	cytoskeleton-dependent cytokinesis	9/54	98/18493	9.89269e-12	4.30992e-10	3.37046e-10	9212/26586/9700/10112/9585/24137/51203/29127/55521	9
Green	BP	GO:2000816	negative regulation of mitotic sister chromatid separation	7/54	39/18493	1.73028e-11	7.2951e-10	5.70494e-10	9212/991/1063/10403/9232/26255/7272	7
Green	BP	GO:0051225	spindle assembly	9/54	105/18493	1.86024e-11	7.59792e-10	5.94175e-10	259266/6790/9212/991/29899/3832/24137/29127/22974	9
Green	BP	GO:1905819	negative regulation of chromosome separation	7/54	40/18493	2.09265e-11	8.28815e-10	6.48153e-10	9212/991/1063/10403/9232/26255/7272	7
Green	BP	GO:0033048	negative regulation of mitotic sister chromatid segregation	7/54	42/18493	3.01472e-11	1.15889e-09	9.06282e-10	9212/991/1063/10403/9232/26255/7272	7
Green	BP	GO:0010948	negative regulation of cell cycle process	12/54	304/18493	5.80742e-11	2.14558e-09	1.6779e-09	6790/9212/991/1063/51514/9700/2146/10403/9232/26255/6241/7272	12
Green	BP	GO:0140013	meiotic nuclear division	10/54	171/18493	5.90979e-11	2.14558e-09	1.6779e-09	259266/6790/991/9700/9232/26255/10592/10051/7153/7272	10
Green	BP	GO:0000281	mitotic cytokinesis	8/54	85/18493	1.24624e-10	4.36144e-09	3.41075e-09	26586/9700/10112/9585/24137/51203/29127/55521	8
Green	BP	GO:0030071	regulation of mitotic metaphase/anaphase transition	7/54	51/18493	1.26805e-10	4.36144e-09	3.41075e-09	9212/991/1063/9787/9700/10403/7272	7
Green	BP	GO:0045839	negative regulation of mitotic nuclear division	7/54	52/18493	1.46205e-10	4.89973e-09	3.8317e-09	9212/991/1063/10403/9232/26255/7272	7
Green	BP	GO:1903046	meiotic cell cycle process	10/54	188/18493	1.506e-10	4.92086e-09	3.84823e-09	259266/6790/991/9700/9232/26255/10592/10051/7153/7272	10
Green	BP	GO:1902099	regulation of metaphase/anaphase transition of cell cycle	7/54	53/18493	1.68078e-10	5.358e-09	4.19008e-09	9212/991/1063/9787/9700/10403/7272	7
Green	BP	GO:2001251	negative regulation of chromosome organization	9/54	144/18493	3.22981e-10	1.00509e-08	7.86001e-09	9212/991/1063/9700/10403/9232/26255/7153/7272	9
Green	BP	GO:0051784	negative regulation of nuclear division	7/54	60/18493	4.14603e-10	1.2602e-08	9.85507e-09	9212/991/1063/10403/9232/26255/7272	7
Green	BP	GO:0045930	negative regulation of mitotic cell cycle	11/54	281/18493	4.39944e-10	1.30683e-08	1.02197e-08	6790/9212/991/1063/2146/9735/10403/9232/26255/7153/7272	11
Green	BP	GO:0051321	meiotic cell cycle	10/54	249/18493	2.3266e-09	6.75748e-08	5.28451e-08	259266/6790/991/9700/9232/26255/10592/10051/7153/7272	10
Green	BP	GO:0000086	G2/M transition of mitotic cell cycle	9/54	199/18493	5.6499e-09	1.60531e-07	1.25539e-07	6790/9212/9133/1063/51514/3161/5116/10733/22974	9
Green	BP	GO:0045132	meiotic chromosome segregation	7/54	89/18493	6.93387e-09	1.92821e-07	1.5079e-07	9700/9232/26255/10592/10051/7153/7272	7
Green	BP	GO:0010639	negative regulation of organelle organization	11/54	384/18493	1.1535e-08	3.08039e-07	2.40894e-07	9212/991/1063/26586/9700/27429/10403/9232/26255/7153/7272	11
Green	BP	GO:0000075	cell cycle checkpoint	9/54	216/18493	1.15485e-08	3.08039e-07	2.40894e-07	6790/9212/991/1063/51514/9735/10403/7153/7272	9
Green	BP	GO:0044839	cell cycle G2/M phase transition	9/54	218/18493	1.25117e-08	3.27057e-07	2.55766e-07	6790/9212/9133/1063/51514/3161/5116/10733/22974	9
Green	BP	GO:0010389	regulation of G2/M transition of mitotic cell cycle	8/54	153/18493	1.37687e-08	3.52857e-07	2.75942e-07	6790/9212/1063/51514/3161/5116/10733/22974	8
Green	BP	GO:0090307	mitotic spindle assembly	6/54	60/18493	2.06534e-08	5.19114e-07	4.0596e-07	9212/991/3832/24137/29127/22974	6
Green	BP	GO:0007093	mitotic cell cycle checkpoint	8/54	166/18493	2.60683e-08	6.42854e-07	5.02728e-07	6790/9212/991/1063/9735/10403/7153/7272	8
Green	BP	GO:1902749	regulation of cell cycle G2/M phase transition	8/54	170/18493	3.13875e-08	7.50497e-07	5.86907e-07	6790/9212/1063/51514/3161/5116/10733/22974	8
Green	BP	GO:0000022	mitotic spindle elongation	4/54	12/18493	3.15818e-08	7.50497e-07	5.86907e-07	9212/24137/9055/29127	4
Green	BP	GO:0070507	regulation of microtubule cytoskeleton organization	8/54	175/18493	3.93324e-08	9.17991e-07	7.17891e-07	6790/26586/29899/3832/10733/10460/22974/55521	8
Green	BP	GO:0051231	spindle elongation	4/54	13/18493	4.55194e-08	9.81659e-07	7.67681e-07	9212/24137/9055/29127	4
Green	BP	GO:0007094	mitotic spindle assembly checkpoint	5/54	34/18493	4.58158e-08	9.81659e-07	7.67681e-07	9212/991/1063/10403/7272	5
Green	BP	GO:0031577	spindle checkpoint	5/54	34/18493	4.58158e-08	9.81659e-07	7.67681e-07	9212/991/1063/10403/7272	5
Green	BP	GO:0071173	spindle assembly checkpoint	5/54	34/18493	4.58158e-08	9.81659e-07	7.67681e-07	9212/991/1063/10403/7272	5
Green	BP	GO:0071174	mitotic spindle checkpoint	5/54	34/18493	4.58158e-08	9.81659e-07	7.67681e-07	9212/991/1063/10403/7272	5
Green	BP	GO:0045841	negative regulation of mitotic metaphase/anaphase transition	5/54	36/18493	6.17992e-08	1.30277e-06	1.0188e-06	9212/991/1063/10403/7272	5
Green	BP	GO:1902100	negative regulation of metaphase/anaphase transition of cell cycle	5/54	37/18493	7.12976e-08	1.47914e-06	1.15672e-06	9212/991/1063/10403/7272	5
Green	BP	GO:0007076	mitotic chromosome condensation	4/54	16/18493	1.15118e-07	2.35092e-06	1.83847e-06	64151/51203/10592/10051	4
Green	BP	GO:0032886	regulation of microtubule-based process	8/54	204/18493	1.2872e-07	2.58826e-06	2.02408e-06	6790/26586/29899/3832/10733/10460/22974/55521	8
Green	BP	GO:0051653	spindle localization	5/54	42/18493	1.37611e-07	2.72511e-06	2.1311e-06	259266/9700/29899/10403/51203	5
Green	BP	GO:0032465	regulation of cytokinesis	6/54	84/18493	1.58959e-07	3.10088e-06	2.42497e-06	6790/9212/10112/9585/9055/29127	6
Green	BP	GO:1901988	negative regulation of cell cycle phase transition	8/54	211/18493	1.66776e-07	3.20552e-06	2.5068e-06	6790/9212/991/1063/51514/2146/10403/7272	8
Green	BP	GO:0030261	chromosome condensation	5/54	45/18493	1.96336e-07	3.719e-06	2.90834e-06	64151/51203/10592/10051/7153	5
Green	BP	GO:0045931	positive regulation of mitotic cell cycle	7/54	157/18493	3.52239e-07	6.57681e-06	5.14323e-06	6790/9787/51514/9700/9585/10403/51203	7
Green	BP	GO:0051383	kinetochore organization	4/54	21/18493	3.74485e-07	6.89369e-06	5.39103e-06	1063/10403/10592/10051	4
Green	BP	GO:0051302	regulation of cell division	7/54	162/18493	4.35657e-07	7.90838e-06	6.18454e-06	259266/6790/9212/10112/9585/9055/29127	7
Green	BP	GO:0040001	establishment of mitotic spindle localization	4/54	27/18493	1.08395e-06	1.94071e-05	1.51769e-05	9700/29899/10403/51203	4
Green	BP	GO:1901991	negative regulation of mitotic cell cycle phase transition	7/54	191/18493	1.31958e-06	2.33066e-05	1.82263e-05	6790/9212/991/1063/2146/10403/7272	7
Green	BP	GO:0006323	DNA packaging	7/54	209/18493	2.40427e-06	4.18984e-05	3.27656e-05	3148/64151/51203/11339/10592/10051/7153	7
Green	BP	GO:0051256	mitotic spindle midzone assembly	3/54	10/18493	2.78361e-06	4.78708e-05	3.74361e-05	9212/24137/29127	3
Green	BP	GO:0035404	histone-serine phosphorylation	3/54	11/18493	3.81956e-06	6.48332e-05	5.07011e-05	6790/9212/7443	3
Green	BP	GO:0031145	anaphase-promoting complex-dependent catabolic process	4/54	37/18493	3.99188e-06	6.60429e-05	5.16471e-05	6790/9212/991/9232	4
Green	BP	GO:0051293	establishment of spindle localization	4/54	37/18493	3.99188e-06	6.60429e-05	5.16471e-05	9700/29899/10403/51203	4
Green	BP	GO:0032506	cytokinetic process	4/54	38/18493	4.45188e-06	7.27326e-05	5.68786e-05	9212/10112/9585/29127	4
Green	BP	GO:0000212	meiotic spindle organization	3/54	13/18493	6.59322e-06	0.00010509	8.21825e-05	259266/6790/9700	3
Green	BP	GO:0051255	spindle midzone assembly	3/54	13/18493	6.59322e-06	0.00010509	8.21825e-05	9212/24137/29127	3
Green	BP	GO:0007018	microtubule-based movement	7/54	269/18493	1.25883e-05	0.000198228	0.000155019	9787/3832/56992/10112/9585/24137/29127	7
Green	BP	GO:0045840	positive regulation of mitotic nuclear division	4/54	51/18493	1.46541e-05	0.000228011	0.00017831	6790/9787/9700/51203	4
Green	BP	GO:0034501	protein localization to kinetochore	3/54	17/18493	1.5547e-05	0.000239058	0.000186949	9212/10403/7272	3
Green	BP	GO:0071103	DNA conformation change	7/54	283/18493	1.74716e-05	0.000265527	0.000207649	3148/64151/51203/11339/10592/10051/7153	7
Green	BP	GO:0007127	meiosis I	5/54	113/18493	1.94116e-05	0.000291621	0.000228054	6790/9700/9232/26255/7153	5
Green	BP	GO:0061982	meiosis I cell cycle process	5/54	118/18493	2.3931e-05	0.00035543	0.000277954	6790/9700/9232/26255/7153	5
Green	BP	GO:0071459	protein localization to chromosome, centromeric region	3/54	22/18493	3.48473e-05	0.000511746	0.000400198	9212/10403/7272	3
Green	BP	GO:0051785	positive regulation of nuclear division	4/54	64/18493	3.62266e-05	0.00052609	0.000411415	6790/9787/9700/51203	4
Green	BP	GO:0051642	centrosome localization	3/54	24/18493	4.56104e-05	0.000655085	0.000512292	259266/6790/29899	3
Green	BP	GO:0051307	meiotic chromosome separation	3/54	25/18493	5.1723e-05	0.000726902	0.000568455	9700/7153/7272	3
Green	BP	GO:0061842	microtubule organizing center localization	3/54	25/18493	5.1723e-05	0.000726902	0.000568455	259266/6790/29899	3
Green	BP	GO:0051984	positive regulation of chromosome segregation	3/54	28/18493	7.32162e-05	0.00101802	0.000796114	9787/9700/2237	3
Green	BP	GO:0007143	female meiotic nuclear division	3/54	30/18493	9.03639e-05	0.00124322	0.000972226	6790/7153/7272	3
Green	BP	GO:0034502	protein localization to chromosome	4/54	81/18493	9.14415e-05	0.00124494	0.000973571	9212/2146/10403/7272	4
Green	BP	GO:0097194	execution phase of apoptosis	4/54	82/18493	9.59236e-05	0.0012925	0.00101076	2237/3148/27429/7153	4
Green	BP	GO:0008608	attachment of spindle microtubules to kinetochore	3/54	32/18493	0.00010994	0.00146624	0.00114664	9212/10403/29127	3
Green	BP	GO:0006890	retrograde vesicle-mediated transport, Golgi to ER	4/54	86/18493	0.000115461	0.00152432	0.00119206	3832/56992/24137/29127	4
Green	BP	GO:0030262	apoptotic nuclear changes	3/54	34/18493	0.000132091	0.00170934	0.00133674	2237/3148/7153	3
Green	BP	GO:0097421	liver regeneration	3/54	34/18493	0.000132091	0.00170934	0.00133674	6790/2146/7298	3
Green	BP	GO:0006921	cellular component disassembly involved in execution phase of apoptosis	3/54	36/18493	0.000156959	0.0019917	0.00155756	2237/3148/7153	3
Green	BP	GO:0060236	regulation of mitotic spindle organization	3/54	36/18493	0.000156959	0.0019917	0.00155756	29899/10460/22974	3
Green	BP	GO:0016572	histone phosphorylation	3/54	37/18493	0.000170456	0.00212177	0.00165928	6790/9212/7443	3
Green	BP	GO:0032467	positive regulation of cytokinesis	3/54	37/18493	0.000170456	0.00212177	0.00165928	9212/9585/29127	3
Green	BP	GO:0019886	antigen processing and presentation of exogenous peptide antigen via MHC class II	4/54	98/18493	0.000191388	0.00235985	0.00184546	3832/56992/24137/29127	4
Green	BP	GO:1901989	positive regulation of cell cycle phase transition	4/54	100/18493	0.000206863	0.00252682	0.00197603	9787/51514/9700/2146	4
Green	BP	GO:0002495	antigen processing and presentation of peptide antigen via MHC class II	4/54	101/18493	0.000214929	0.00258291	0.0020199	3832/56992/24137/29127	4
Green	BP	GO:0090224	regulation of spindle organization	3/54	40/18493	0.000215407	0.00258291	0.0020199	29899/10460/22974	3
Green	BP	GO:0002504	antigen processing and presentation of peptide or polysaccharide antigen via MHC class II	4/54	102/18493	0.00022322	0.00265226	0.00207413	3832/56992/24137/29127	4
Green	BP	GO:0051445	regulation of meiotic cell cycle	3/54	48/18493	0.000370922	0.00429114	0.00335577	259266/991/7272	3
Green	BP	GO:0072698	protein localization to microtubule cytoskeleton	3/54	48/18493	0.000370922	0.00429114	0.00335577	6790/9585/7272	3
Green	BP	GO:1902101	positive regulation of metaphase/anaphase transition of cell cycle	2/54	10/18493	0.000371001	0.00429114	0.00335577	9787/9700	2
Green	BP	GO:0006265	DNA topological change	2/54	11/18493	0.000452597	0.00509952	0.00398795	3148/7153	2
Green	BP	GO:0009157	deoxyribonucleoside monophosphate biosynthetic process	2/54	11/18493	0.000452597	0.00509952	0.00398795	1633/7298	2
Green	BP	GO:1905820	positive regulation of chromosome separation	2/54	11/18493	0.000452597	0.00509952	0.00398795	9787/9700	2
Green	BP	GO:0044380	protein localization to cytoskeleton	3/54	53/18493	0.000497231	0.00552998	0.00432458	6790/9585/7272	3
Green	BP	GO:0002478	antigen processing and presentation of exogenous peptide antigen	4/54	126/18493	0.000499264	0.00552998	0.00432458	3832/56992/24137/29127	4
Green	BP	GO:0046777	protein autophosphorylation	5/54	227/18493	0.00051688	0.005677	0.00443955	6790/9212/5167/7272/7443	5
Green	BP	GO:0007077	mitotic nuclear envelope disassembly	2/54	12/18493	0.0005421	0.00585558	0.0045792	9133/7443	2
Green	BP	GO:0051657	maintenance of organelle location	2/54	12/18493	0.0005421	0.00585558	0.0045792	259266/29899	2
Green	BP	GO:1901796	regulation of signal transduction by p53 class mediator	4/54	130/18493	0.000561733	0.00601791	0.00470615	6790/9212/6877/22974	4
Green	BP	GO:0007062	sister chromatid cohesion	3/54	56/18493	0.000584748	0.00611412	0.00478139	991/9700/2237	3
Green	BP	GO:0045143	homologous chromosome segregation	3/54	56/18493	0.000584748	0.00611412	0.00478139	9700/9232/26255	3
Green	BP	GO:0046605	regulation of centrosome cycle	3/54	56/18493	0.000584748	0.00611412	0.00478139	6790/3832/10733	3
Green	BP	GO:0007292	female gamete generation	4/54	134/18493	0.000629573	0.00647914	0.00506685	259266/6790/7153/7272	4
Green	BP	GO:0019884	antigen processing and presentation of exogenous antigen	4/54	134/18493	0.000629573	0.00647914	0.00506685	3832/56992/24137/29127	4
Green	BP	GO:0007100	mitotic centrosome separation	2/54	13/18493	0.000639465	0.00652954	0.00510626	6790/3832	2
Green	BP	GO:1902750	negative regulation of cell cycle G2/M phase transition	3/54	60/18493	0.000715941	0.00725376	0.00567261	6790/9212/51514	3
Green	BP	GO:0048002	antigen processing and presentation of peptide antigen	4/54	139/18493	0.000722313	0.00726202	0.00567907	3832/56992/24137/29127	4
Green	BP	GO:0009162	deoxyribonucleoside monophosphate metabolic process	2/54	14/18493	0.000744647	0.00737314	0.00576597	1633/7298	2
Green	BP	GO:0051299	centrosome separation	2/54	14/18493	0.000744647	0.00737314	0.00576597	6790/3832	2
Green	BP	GO:2000241	regulation of reproductive process	4/54	142/18493	0.000782383	0.00768853	0.00601261	259266/6790/991/7272	4
Green	BP	GO:0009263	deoxyribonucleotide biosynthetic process	2/54	16/18493	0.000978283	0.00940159	0.00735227	6241/7298	2
Green	BP	GO:0030397	membrane disassembly	2/54	16/18493	0.000978283	0.00940159	0.00735227	9133/7443	2
Green	BP	GO:0051081	nuclear envelope disassembly	2/54	16/18493	0.000978283	0.00940159	0.00735227	9133/7443	2
Green	BP	GO:0000082	G1/S transition of mitotic cell cycle	5/54	263/18493	0.001003	0.0095688	0.00748303	6790/2146/4174/6241/7298	5
Green	BP	GO:0006266	DNA ligation	2/54	17/18493	0.00110665	0.0103313	0.00807936	3148/7153	2
Green	BP	GO:0051782	negative regulation of cell division	2/54	17/18493	0.00110665	0.0103313	0.00807936	259266/9212	2
Green	BP	GO:0062033	positive regulation of mitotic sister chromatid segregation	2/54	17/18493	0.00110665	0.0103313	0.00807936	9787/9700	2
Green	BP	GO:0051303	establishment of chromosome localization	3/54	74/18493	0.00131771	0.0122145	0.00955206	1063/9787/10403	3
Green	BP	GO:2001252	positive regulation of chromosome organization	4/54	165/18493	0.00136561	0.0123471	0.0096557	9212/9787/9700/2237	4
Green	BP	GO:0018105	peptidyl-serine phosphorylation	5/54	282/18493	0.00136697	0.0123471	0.0096557	6790/9212/23031/7272/7443	5
Green	BP	GO:0044843	cell cycle G1/S phase transition	5/54	282/18493	0.00136697	0.0123471	0.0096557	6790/2146/4174/6241/7298	5
Green	BP	GO:0050000	chromosome localization	3/54	75/18493	0.0013698	0.0123471	0.0096557	1063/9787/10403	3
Green	BP	GO:0031100	animal organ regeneration	3/54	78/18493	0.00153377	0.0137304	0.0107375	6790/2146/7298	3
Green	BP	GO:0019882	antigen processing and presentation	4/54	175/18493	0.00169485	0.0150691	0.0117844	3832/56992/24137/29127	4
Green	BP	GO:0018209	peptidyl-serine modification	5/54	301/18493	0.00182055	0.0160774	0.0125729	6790/9212/23031/7272/7443	5
Green	BP	GO:0007063	regulation of sister chromatid cohesion	2/54	22/18493	0.00186218	0.0163347	0.0127741	9700/2237	2
Green	BP	GO:0051781	positive regulation of cell division	3/54	84/18493	0.00189748	0.0165334	0.0129295	9212/9585/29127	3
Green	BP	GO:1901992	positive regulation of mitotic cell cycle phase transition	3/54	85/18493	0.00196287	0.0169898	0.0132865	9787/51514/9700	3
Green	BP	GO:0000132	establishment of mitotic spindle orientation	2/54	23/18493	0.00203572	0.0173901	0.0135995	29899/10403	2
Green	BP	GO:1902410	mitotic cytokinetic process	2/54	23/18493	0.00203572	0.0173901	0.0135995	10112/9585	2
Green	BP	GO:0007568	aging	5/54	311/18493	0.00209944	0.017818	0.0139341	9212/657/3156/27429/7298	5
Green	BP	GO:0071897	DNA biosynthetic process	4/54	189/18493	0.00224333	0.0189163	0.014793	9212/1063/51514/7298	4
Green	BP	GO:1903829	positive regulation of cellular protein localization	5/54	318/18493	0.00231246	0.0193743	0.0151512	29899/27429/9585/10403/5116	5
Green	BP	GO:0006309	apoptotic DNA fragmentation	2/54	25/18493	0.00240489	0.0200203	0.0156564	2237/3148	2
Green	BP	GO:0051656	establishment of organelle localization	6/54	491/18493	0.00298332	0.0246785	0.0192992	1063/9787/9700/29899/10403/51203	6
Green	BP	GO:0000083	regulation of transcription involved in G1/S transition of mitotic cell cycle	2/54	29/18493	0.0032304	0.0263883	0.0206363	6241/7298	2
Green	BP	GO:0051294	establishment of spindle orientation	2/54	29/18493	0.0032304	0.0263883	0.0206363	29899/10403	2
Green	BP	GO:0022412	cellular process involved in reproduction in multicellular organism	5/54	350/18493	0.00349181	0.0283466	0.0221677	259266/6790/3148/7153/7272	5
Green	BP	GO:0040020	regulation of meiotic nuclear division	2/54	31/18493	0.00368606	0.0297387	0.0232564	991/7272	2
Green	BP	GO:0072331	signal transduction by p53 class mediator	4/54	218/18493	0.00374739	0.0300481	0.0234983	6790/9212/6877/22974	4
Green	BP	GO:0000737	DNA catabolic process, endonucleolytic	2/54	33/18493	0.00416987	0.0332318	0.0259881	2237/3148	2
Green	BP	GO:0072089	stem cell proliferation	3/54	114/18493	0.00450281	0.0356677	0.027893	259266/3148/29127	3
Green	BP	GO:0030900	forebrain development	5/54	374/18493	0.00462409	0.0364077	0.0284717	259266/657/2146/27429/10460	5
Green	BP	GO:0009262	deoxyribonucleotide metabolic process	2/54	36/18493	0.00494765	0.0387221	0.0302816	6241/7298	2
Green	BP	GO:0007098	centrosome cycle	3/54	119/18493	0.00507518	0.0394837	0.0308772	6790/3832/10733	3
Green	BP	GO:0006997	nucleus organization	3/54	124/18493	0.00568957	0.0440016	0.0344103	9133/3148/7443	3
Green	BP	GO:0006308	DNA catabolic process	2/54	39/18493	0.00578694	0.0444914	0.0347933	2237/3148	2
Green	BP	GO:0070317	negative regulation of G0 to G1 transition	2/54	40/18493	0.00608018	0.0464725	0.0363426	2146/6241	2
Green	BP	GO:0030010	establishment of cell polarity	3/54	128/18493	0.00621189	0.0472032	0.036914	29899/9585/10403	3
Green	CC	GO:0005819	spindle	23/55	333/19659	9.80206e-27	1.37229e-24	9.90524e-25	259266/6790/9212/991/1063/26586/9787/9700/29899/3832/56992/10112/9585/24137/9735/57509/51203/9055/29127/10460/22974/7272/7443	23
Green	CC	GO:0000922	spindle pole	14/55	154/19659	5.9284e-18	4.14988e-16	2.9954e-16	259266/6790/9212/991/1063/26586/9787/29899/3832/9585/9735/9055/10460/22974	14
Green	CC	GO:0072686	mitotic spindle	11/55	101/19659	3.73181e-15	1.74151e-13	1.25703e-13	259266/6790/9212/9700/29899/3832/9585/51203/29127/10460/22974	11
Green	CC	GO:0005874	microtubule	16/55	414/19659	1.57647e-14	5.51765e-13	3.98266e-13	259266/6790/9212/26586/3832/56992/10112/9585/24137/9735/57509/51203/5116/9055/29127/22974	16
Green	CC	GO:0000793	condensed chromosome	11/55	221/19659	2.18977e-11	6.13136e-10	4.42564e-10	6790/9212/1063/3148/9735/4288/64151/10403/10592/10051/7153	11
Green	CC	GO:0005876	spindle microtubule	7/55	54/19659	1.44492e-10	3.37148e-09	2.43355e-09	6790/9212/3832/24137/9735/51203/9055	7
Green	CC	GO:0030496	midbody	9/55	172/19659	1.09601e-09	2.19201e-08	1.5822e-08	259266/6790/9212/1063/10112/9585/24137/9055/29127	9
Green	CC	GO:0098687	chromosomal region	10/55	346/19659	3.62787e-08	6.34877e-07	4.58257e-07	6790/9212/1063/2237/9735/4174/64151/10403/11339/7272	10
Green	CC	GO:0000775	chromosome, centromeric region	8/55	194/19659	6.37261e-08	9.91295e-07	7.15521e-07	6790/9212/1063/9735/64151/10403/11339/7272	8
Green	CC	GO:0005875	microtubule associated complex	7/55	147/19659	1.70193e-07	2.38271e-06	1.71985e-06	6790/9212/3832/56992/10112/9585/24137	7
Green	CC	GO:0005871	kinesin complex	5/55	54/19659	4.05423e-07	5.15993e-06	3.72446e-06	3832/56992/10112/9585/24137	5
Green	CC	GO:0000779	condensed chromosome, centromeric region	6/55	117/19659	8.92531e-07	9.8773e-06	7.12948e-06	6790/9212/1063/9735/64151/10403	6
Green	CC	GO:0097431	mitotic spindle pole	4/55	27/19659	9.17178e-07	9.8773e-06	7.12948e-06	259266/6790/29899/9585	4
Green	CC	GO:0051233	spindle midzone	4/55	34/19659	2.38869e-06	2.38869e-05	1.72417e-05	6790/9212/9585/29127	4
Green	CC	GO:0031616	spindle pole centrosome	3/55	14/19659	7.37959e-06	6.88761e-05	4.97151e-05	6790/9212/9787	3
Green	CC	GO:0045120	pronucleus	3/55	17/19659	1.37042e-05	0.000119912	8.65531e-05	6790/1063/2146	3
Green	CC	GO:0000776	kinetochore	5/55	133/19659	3.48524e-05	0.00028702	0.000207172	9212/1063/9735/10403/7272	5
Green	CC	GO:0000780	condensed nuclear chromosome, centromeric region	3/55	24/19659	4.0228e-05	0.000312884	0.000225841	6790/9212/10403	3
Green	CC	GO:0070938	contractile ring	2/55	10/19659	0.000340896	0.00238627	0.00172242	9585/9055	2
Green	CC	GO:0072687	meiotic spindle	2/55	10/19659	0.000340896	0.00238627	0.00172242	259266/6790	2
Green	CC	GO:0032154	cleavage furrow	3/55	54/19659	0.000464567	0.00309711	0.00223551	10112/10733/29127	3
Green	CC	GO:0000940	condensed chromosome outer kinetochore	2/55	12/19659	0.000498187	0.00317028	0.00228833	1063/10403	2
Green	CC	GO:0005814	centriole	4/55	133/19659	0.000522737	0.00317792	0.00229384	6790/5116/10733/7153	4
Green	CC	GO:0045171	intercellular bridge	3/55	57/19659	0.000544786	0.00317792	0.00229384	10112/24137/22974	3
Green	CC	GO:1990023	mitotic spindle midzone	2/55	13/19659	0.000587711	0.00329118	0.00237559	9212/9585	2
Green	CC	GO:0010369	chromocenter	2/55	14/19659	0.000684433	0.00368541	0.00266014	9212/11339	2
Green	CC	GO:0032155	cell division site part	3/55	63/19659	0.000730659	0.0037886	0.00273463	10112/10733/29127	3
Green	CC	GO:0032153	cell division site	3/55	68/19659	0.000913047	0.00456523	0.00329521	10112/10733/29127	3
Green	CC	GO:0044450	microtubule organizing center part	4/55	179/19659	0.00157832	0.00761947	0.00549977	6790/5116/10733/7153	4
Green	CC	GO:0000794	condensed nuclear chromosome	3/55	100/19659	0.0027659	0.0129075	0.00931672	6790/9212/10403	3
Green	CC	GO:0000777	condensed chromosome kinetochore	3/55	104/19659	0.0030905	0.0139571	0.0100743	1063/9735/10403	3
Green	CC	GO:0044815	DNA packaging complex	3/55	114/19659	0.00400149	0.0175065	0.0126363	64151/10592/10051	3
Green	MF	GO:0008017	microtubule binding	9/54	240/17632	4.30862e-08	4.13938e-06	3.51e-06	3832/56992/10112/9585/24137/57509/51203/9055/29127	9
Green	MF	GO:0015631	tubulin binding	10/54	325/17632	4.59931e-08	4.13938e-06	3.51e-06	3832/56992/10112/9585/24137/57509/51203/9055/29127/55521	10
Green	MF	GO:0003777	microtubule motor activity	5/54	84/17632	5.72802e-06	0.000343681	0.000291426	3832/56992/10112/9585/24137	5
Green	MF	GO:0035173	histone kinase activity	3/54	17/17632	1.79124e-05	0.000806057	0.000683498	6790/9212/7443	3
Green	MF	GO:0003774	motor activity	5/54	137/17632	6.1311e-05	0.00203674	0.00172706	3832/56992/10112/9585/24137	5
Green	MF	GO:0004674	protein serine/threonine kinase activity	8/54	455/17632	6.78914e-05	0.00203674	0.00172706	6790/9212/657/9133/23031/10733/7272/7443	8
Green	MF	GO:0008022	protein C-terminus binding	5/54	187/17632	0.000263992	0.00614559	0.00521118	991/1063/29899/4288/7153	5
Green	MF	GO:0003697	single-stranded DNA binding	4/54	105/17632	0.000298701	0.00614559	0.00521118	3148/10635/10592/10051	4
Green	MF	GO:0004712	protein serine/threonine/tyrosine kinase activity	3/54	43/17632	0.00030728	0.00614559	0.00521118	6790/9212/7272	3
Green	MF	GO:0008301	DNA binding, bending	2/54	18/17632	0.00136498	0.0245697	0.0208339	3148/7153	2
Green	MF	GO:0070840	dynein complex binding	2/54	22/17632	0.00204475	0.0334595	0.0283721	1063/29899	2
Green	MF	GO:0016887	ATPase activity	6/54	445/17632	0.00231691	0.0347536	0.0294694	3832/56992/10112/9585/24137/7153	6
Green	MF	GO:0008574	ATP-dependent microtubule motor activity, plus-end-directed	2/54	26/17632	0.00285435	0.0395218	0.0335126	3832/9585	2
Brown	BP	GO:0042119	neutrophil activation	48/178	498/18493	1.51836e-34	4.07984e-31	3.51621e-31	210/306/383/566/820/847/978/1088/1511/1535/1669/1991/2215/2219/2352/25801/11010/3043/3101/3240/8807/3683/3934/11027/11026/10288/4033/4057/4069/4332/4353/932/10562/8993/5473/5553/10394/5777/25797/6036/6037/6283/6279/6280/9522/1992/6793/6947	48
Brown	BP	GO:0002283	neutrophil activation involved in immune response	47/178	488/18493	8.71876e-34	1.17137e-30	1.00954e-30	210/306/383/566/820/847/978/1088/1511/1535/1669/1991/2215/2219/2352/25801/11010/3043/3101/3240/3683/3934/11027/11026/10288/4033/4057/4069/4332/4353/932/10562/8993/5473/5553/10394/5777/25797/6036/6037/6283/6279/6280/9522/1992/6793/6947	47
Brown	BP	GO:0043312	neutrophil degranulation	46/178	485/18493	9.54663e-33	8.5506e-30	7.36933e-30	210/306/383/566/820/847/978/1088/1511/1535/1669/1991/2215/2219/2352/25801/11010/3043/3101/3240/3683/3934/11026/10288/4033/4057/4069/4332/4353/932/10562/8993/5473/5553/10394/5777/25797/6036/6037/6283/6279/6280/9522/1992/6793/6947	46
Brown	BP	GO:0002446	neutrophil mediated immunity	46/178	499/18493	3.40707e-32	2.2887e-29	1.97252e-29	210/306/383/566/820/847/978/1088/1511/1535/1669/1991/2215/2219/2352/25801/11010/3043/3101/3240/3683/3934/11026/10288/4033/4057/4069/4332/4353/932/10562/8993/5473/5553/10394/5777/25797/6036/6037/6283/6279/6280/9522/1992/6793/6947	46
Brown	BP	GO:0050832	defense response to fungus	10/178	39/18493	2.64359e-12	1.42066e-09	1.2244e-09	383/1511/1669/1991/23765/4057/4353/6283/6279/6280	10
Brown	BP	GO:0019730	antimicrobial humoral response	14/178	118/18493	7.64881e-12	3.42539e-09	2.95217e-09	566/820/1511/1669/1991/3934/4057/4069/8993/5473/6037/6283/6279/6280	14
Brown	BP	GO:0001906	cell killing	15/178	158/18493	3.46225e-11	1.32901e-08	1.14541e-08	383/566/820/912/11151/1511/1669/1991/8807/4057/4069/4277/8993/5777/6283	15
Brown	BP	GO:0009620	response to fungus	10/178	51/18493	4.81009e-11	1.61559e-08	1.3924e-08	383/1511/1669/1991/23765/4057/4353/6283/6279/6280	10
Brown	BP	GO:0042742	defense response to bacterium	19/178	319/18493	2.70105e-10	7.2643e-08	6.26073e-08	306/566/820/1511/1535/1669/1991/3240/3394/4057/4069/4353/8993/5473/5553/6037/6283/6279/6280	19
Brown	BP	GO:0031640	killing of cells of other organism	10/178	61/18493	3.12463e-10	7.2643e-08	6.26073e-08	383/566/820/1511/1669/1991/4057/4069/8993/6283	10
Brown	BP	GO:0044364	disruption of cells of other organism	10/178	61/18493	3.12463e-10	7.2643e-08	6.26073e-08	383/566/820/1511/1669/1991/4057/4069/8993/6283	10
Brown	BP	GO:0046501	protoporphyrinogen IX metabolic process	6/178	11/18493	3.2442e-10	7.2643e-08	6.26073e-08	210/212/2235/3145/5498/7389	6
Brown	BP	GO:0006779	porphyrin-containing compound biosynthetic process	7/178	25/18493	2.82422e-09	5.83744e-07	5.03099e-07	210/212/2235/3145/5498/6708/7389	7
Brown	BP	GO:0033014	tetrapyrrole biosynthetic process	7/178	28/18493	6.7892e-09	1.30304e-06	1.12303e-06	210/212/2235/3145/5498/6708/7389	7
Brown	BP	GO:0044110	growth involved in symbiotic interaction	6/178	18/18493	1.23259e-08	2.06999e-06	1.78402e-06	820/1511/1991/3394/4353/8993	6
Brown	BP	GO:0044116	growth of symbiont involved in interaction with host	6/178	18/18493	1.23259e-08	2.06999e-06	1.78402e-06	820/1511/1991/3394/4353/8993	6
Brown	BP	GO:0032496	response to lipopolysaccharide	17/178	324/18493	1.64302e-08	2.59694e-06	2.23817e-06	210/383/1511/1669/1991/2672/3055/3394/3934/11027/10288/4057/4353/5473/26191/6279/6622	17
Brown	BP	GO:0061844	antimicrobial humoral immune response mediated by antimicrobial peptide	9/178	71/18493	2.58264e-08	3.8553e-06	3.32269e-06	820/1669/1991/4057/8993/5473/6037/6283/6280	9
Brown	BP	GO:0002237	response to molecule of bacterial origin	17/178	337/18493	2.92678e-08	4.13909e-06	3.56727e-06	210/383/1511/1669/1991/2672/3055/3394/3934/11027/10288/4057/4353/5473/26191/6279/6622	17
Brown	BP	GO:0006783	heme biosynthetic process	6/178	21/18493	3.51759e-08	4.72588e-06	4.073e-06	210/212/2235/3145/5498/7389	6
Brown	BP	GO:0006778	porphyrin-containing compound metabolic process	7/178	37/18493	5.48783e-08	7.0218e-06	6.05174e-06	210/212/2235/3145/5498/6708/7389	7
Brown	BP	GO:0051873	killing by host of symbiont cells	5/178	12/18493	5.8564e-08	7.15279e-06	6.16463e-06	383/566/820/1511/1991	5
Brown	BP	GO:0033013	tetrapyrrole metabolic process	8/178	59/18493	9.18275e-08	1.07279e-05	9.24579e-06	210/212/2235/3145/5498/6708/6947/7389	8
Brown	BP	GO:0007159	leukocyte cell-cell adhesion	16/178	327/18493	1.1573e-07	1.29569e-05	1.11669e-05	383/912/11151/1991/7430/3142/3683/10288/4602/26191/5777/6279/6280/6708/6793/7037	16
Brown	BP	GO:0044146	negative regulation of growth of symbiont involved in interaction with host	5/178	14/18493	1.4574e-07	1.50617e-05	1.29809e-05	820/1511/1991/3394/4353	5
Brown	BP	GO:0051852	disruption by host of symbiont cells	5/178	14/18493	1.4574e-07	1.50617e-05	1.29809e-05	383/566/820/1511/1991	5
Brown	BP	GO:0050900	leukocyte migration	19/178	478/18493	1.88744e-07	1.87835e-05	1.61885e-05	566/1088/11151/1441/1525/1991/2993/2994/2995/3055/23765/3683/4354/5473/5777/6283/6279/6280/6793	19
Brown	BP	GO:0044144	modulation of growth of symbiont involved in interaction with host	5/178	15/18493	2.16908e-07	2.08154e-05	1.79398e-05	820/1511/1991/3394/4353	5
Brown	BP	GO:0006959	humoral immune response	16/178	349/18493	2.79669e-07	2.59128e-05	2.2333e-05	566/820/1511/1669/1991/2219/3934/4057/4069/8993/5473/5777/6037/6283/6279/6280	16
Brown	BP	GO:0051883	killing of cells in other organism involved in symbiotic interaction	5/178	16/18493	3.13047e-07	2.80386e-05	2.4165e-05	383/566/820/1511/1991	5
Brown	BP	GO:0042168	heme metabolic process	6/178	30/18493	3.58206e-07	3.10484e-05	2.6759e-05	210/212/2235/3145/5498/7389	6
Brown	BP	GO:0044117	growth of symbiont in host	5/178	17/18493	4.40032e-07	3.69489e-05	3.18444e-05	1511/1991/3394/4353/8993	5
Brown	BP	GO:0035821	modification of morphology or physiology of other organism	11/178	161/18493	4.60077e-07	3.74614e-05	3.22861e-05	383/566/820/1511/1669/1991/4057/4069/8993/6283/6280	11
Brown	BP	GO:0071222	cellular response to lipopolysaccharide	12/178	199/18493	5.25956e-07	4.13045e-05	3.55983e-05	383/1511/1669/2672/3055/3394/3934/11027/10288/4057/5473/26191	12
Brown	BP	GO:0042744	hydrogen peroxide catabolic process	6/178	32/18493	5.38019e-07	4.13045e-05	3.55983e-05	847/3043/3045/3240/4353/6622	6
Brown	BP	GO:0051818	disruption of cells of other organism involved in symbiotic interaction	5/178	18/18493	6.04534e-07	4.51217e-05	3.88881e-05	383/566/820/1511/1991	5
Brown	BP	GO:0071219	cellular response to molecule of bacterial origin	12/178	206/18493	7.60194e-07	5.52065e-05	4.75797e-05	383/1511/1669/2672/3055/3394/3934/11027/10288/4057/5473/26191	12
Brown	BP	GO:0001909	leukocyte mediated cytotoxicity	9/178	105/18493	7.8756e-07	5.56888e-05	4.79953e-05	383/566/912/11151/1511/1991/8807/4277/5777	9
Brown	BP	GO:0015669	gas transport	5/178	19/18493	8.14056e-07	5.60864e-05	4.8338e-05	760/3043/3045/26034/6005	5
Brown	BP	GO:0031349	positive regulation of defense response	17/178	427/18493	8.44434e-07	5.67248e-05	4.88883e-05	383/912/1535/2219/2672/3055/23765/8807/11027/4057/4277/8993/26191/6283/6279/6280/6622	17
Brown	BP	GO:0042743	hydrogen peroxide metabolic process	7/178	57/18493	1.19851e-06	7.85465e-05	6.76952e-05	847/1535/3043/3045/3240/4353/6622	7
Brown	BP	GO:0006979	response to oxidative stress	17/178	441/18493	1.31399e-06	8.4064e-05	7.24505e-05	210/383/847/1535/25793/3043/3240/8807/26034/3934/4277/4353/4602/653361/5445/6622/7351	17
Brown	BP	GO:0070942	neutrophil mediated cytotoxicity	4/178	10/18493	1.6657e-06	0.000104087	8.9707e-05	383/566/1511/1991	4
Brown	BP	GO:0050829	defense response to Gram-negative bacterium	8/178	87/18493	1.92463e-06	0.000117534	0.000101296	566/820/1511/1669/1991/4057/4069/6037	8
Brown	BP	GO:0030099	myeloid cell differentiation	16/178	405/18493	1.99176e-06	0.00011893	0.0001025	51327/212/669/760/1441/2038/3394/10661/4057/4778/5305/5777/6005/54997/7037/25893	16
Brown	BP	GO:0071216	cellular response to biotic stimulus	12/178	229/18493	2.31194e-06	0.000135048	0.000116391	383/1511/1669/2672/3055/3394/3934/11027/10288/4057/5473/26191	12
Brown	BP	GO:0045088	regulation of innate immune response	15/178	365/18493	2.60694e-06	0.000149039	0.00012845	383/912/1535/2219/2672/3055/8807/11027/4057/4277/8993/26191/5777/6279/6280	15
Brown	BP	GO:0061515	myeloid cell development	7/178	67/18493	3.63599e-06	0.00020354	0.00017542	669/2038/4057/5305/5777/6005/25893	7
Brown	BP	GO:0050670	regulation of lymphocyte proliferation	11/178	205/18493	4.91659e-06	0.00026961	0.000232363	383/912/1178/11151/10288/7940/4332/26191/5777/6708/7037	11
Brown	BP	GO:0032944	regulation of mononuclear cell proliferation	11/178	206/18493	5.15105e-06	0.000276817	0.000238575	383/912/1178/11151/10288/7940/4332/26191/5777/6708/7037	11
Brown	BP	GO:0044130	negative regulation of growth of symbiont in host	4/178	13/18493	5.54441e-06	0.000292114	0.000251758	1511/1991/3394/4353	4
Brown	BP	GO:0019731	antibacterial humoral response	6/178	47/18493	5.65641e-06	0.000292284	0.000251905	820/1511/1669/1991/4057/6037	6
Brown	BP	GO:0055076	transition metal ion homeostasis	9/178	136/18493	6.7977e-06	0.000344631	0.00029702	212/2038/3934/4057/6005/6279/6280/51312/7037	9
Brown	BP	GO:0051250	negative regulation of lymphocyte activation	9/178	137/18493	7.21612e-06	0.000359069	0.000309463	383/25793/3142/10288/7940/4332/8993/26191/5777	9
Brown	BP	GO:0020027	hemoglobin metabolic process	4/178	14/18493	7.70387e-06	0.000369012	0.000318033	51327/212/847/2038	4
Brown	BP	GO:0044126	regulation of growth of symbiont in host	4/178	14/18493	7.70387e-06	0.000369012	0.000318033	1511/1991/3394/4353	4
Brown	BP	GO:0042110	T cell activation	16/178	451/18493	7.82794e-06	0.000369012	0.000318033	383/11119/912/915/1178/11151/1525/3142/3683/10288/4277/4602/26191/5777/6708/7037	16
Brown	BP	GO:0070663	regulation of leukocyte proliferation	11/178	216/18493	8.08911e-06	0.000374749	0.000322977	383/912/1178/11151/10288/7940/4332/26191/5777/6708/7037	11
Brown	BP	GO:0045089	positive regulation of innate immune response	13/178	309/18493	9.65425e-06	0.000439677	0.000378936	912/1535/2219/2672/3055/8807/11027/4057/4277/8993/26191/6279/6280	13
Brown	BP	GO:0046651	lymphocyte proliferation	12/178	264/18493	9.90827e-06	0.000443726	0.000382425	383/11119/912/1178/11151/10288/7940/4332/26191/5777/6708/7037	12
Brown	BP	GO:0032943	mononuclear cell proliferation	12/178	266/18493	1.06894e-05	0.000470861	0.000405811	383/11119/912/1178/11151/10288/7940/4332/26191/5777/6708/7037	12
Brown	BP	GO:0046148	pigment biosynthetic process	6/178	54/18493	1.28679e-05	0.000557677	0.000480634	210/212/2235/3145/5498/7389	6
Brown	BP	GO:0045730	respiratory burst	5/178	33/18493	1.48968e-05	0.000635362	0.000547586	1535/3055/4353/653361/4689	5
Brown	BP	GO:0055072	iron ion homeostasis	7/178	84/18493	1.65074e-05	0.000693054	0.000597308	212/2038/3934/4057/6005/51312/7037	7
Brown	BP	GO:0051188	cofactor biosynthetic process	12/178	279/18493	1.72143e-05	0.000711614	0.000613304	31/210/212/669/1535/2235/3101/3145/5498/6622/6708/7389	12
Brown	BP	GO:0017001	antibiotic catabolic process	6/178	57/18493	1.76535e-05	0.000715655	0.000616787	847/3043/3045/3240/4353/6622	6
Brown	BP	GO:0097237	cellular response to toxic substance	11/178	235/18493	1.78448e-05	0.000715655	0.000616787	383/847/3043/3045/3240/8807/26034/3934/4353/4602/6280	11
Brown	BP	GO:0070661	leukocyte proliferation	12/178	283/18493	1.98217e-05	0.000783249	0.000675042	383/11119/912/1178/11151/10288/7940/4332/26191/5777/6708/7037	12
Brown	BP	GO:0071621	granulocyte chemotaxis	8/178	120/18493	2.11426e-05	0.000823335	0.000709591	1441/1525/23765/4354/5473/6283/6279/6280	8
Brown	BP	GO:0002695	negative regulation of leukocyte activation	9/178	164/18493	3.05252e-05	0.00117173	0.00100986	383/25793/3142/10288/7940/4332/8993/26191/5777	9
Brown	BP	GO:0043901	negative regulation of multi-organism process	9/178	169/18493	3.865e-05	0.00146271	0.00126064	820/1511/1991/2219/3394/11027/4057/4277/4353	9
Brown	BP	GO:0097530	granulocyte migration	8/178	134/18493	4.67784e-05	0.00174574	0.00150457	1441/1525/23765/4354/5473/6283/6279/6280	8
Brown	BP	GO:0051187	cofactor catabolic process	6/178	68/18493	4.87887e-05	0.00179057	0.0015432	847/3043/3045/3240/4353/6622	6
Brown	BP	GO:0030595	leukocyte chemotaxis	10/178	217/18493	4.93123e-05	0.00179057	0.0015432	566/11151/1441/1525/23765/4354/5473/6283/6279/6280	10
Brown	BP	GO:0042440	pigment metabolic process	6/178	69/18493	5.30125e-05	0.00188277	0.00162266	210/212/2235/3145/5498/7389	6
Brown	BP	GO:0051249	regulation of lymphocyte activation	15/178	472/18493	5.40015e-05	0.00188277	0.00162266	383/912/1178/11151/25793/3142/10288/7940/4332/4602/8993/26191/5777/6708/7037	15
Brown	BP	GO:0030593	neutrophil chemotaxis	7/178	101/18493	5.46543e-05	0.00188277	0.00162266	1441/1525/4354/5473/6283/6279/6280	7
Brown	BP	GO:0098869	cellular oxidant detoxification	7/178	101/18493	5.46543e-05	0.00188277	0.00162266	847/3043/3045/3240/26034/4353/6280	7
Brown	BP	GO:0015701	bicarbonate transport	5/178	43/18493	5.58961e-05	0.00190118	0.00163853	759/760/3043/6005/6521	5
Brown	BP	GO:0042098	T cell proliferation	9/178	178/18493	5.79071e-05	0.00194495	0.00167626	383/11119/912/1178/11151/10288/5777/6708/7037	9
Brown	BP	GO:0002221	pattern recognition receptor signaling pathway	9/178	179/18493	6.04749e-05	0.00200612	0.00172898	1535/2219/2672/11027/4057/8993/26191/6279/6280	9
Brown	BP	GO:0000302	response to reactive oxygen species	10/178	224/18493	6.43689e-05	0.00210926	0.00181786	383/847/3043/3240/8807/3934/4353/4602/653361/7351	10
Brown	BP	GO:1990748	cellular detoxification	7/178	105/18493	7.00323e-05	0.00226719	0.00195398	847/3043/3045/3240/26034/4353/6280	7
Brown	BP	GO:0050866	negative regulation of cell activation	9/178	184/18493	7.48012e-05	0.00239275	0.00206219	383/25793/3142/10288/7940/4332/8993/26191/5777	9
Brown	BP	GO:0002227	innate immune response in mucosa	4/178	24/18493	7.585e-05	0.00239775	0.0020665	820/1669/4057/6037	4
Brown	BP	GO:0002758	innate immune response-activating signal transduction	10/178	233/18493	8.93332e-05	0.00279114	0.00240555	1535/2219/2672/3055/11027/4057/8993/26191/6279/6280	10
Brown	BP	GO:0051851	modification by host of symbiont morphology or physiology	6/178	76/18493	9.14528e-05	0.00282452	0.00243431	383/566/820/1511/1991/4057	6
Brown	BP	GO:0030218	erythrocyte differentiation	7/178	111/18493	9.95744e-05	0.00302263	0.00260505	51327/212/669/2038/10661/6005/25893	7
Brown	BP	GO:0019755	one-carbon compound transport	3/178	10/18493	0.000100117	0.00302263	0.00260505	760/6005/6563	3
Brown	BP	GO:1990266	neutrophil migration	7/178	112/18493	0.000105361	0.00314562	0.00271105	1441/1525/4354/5473/6283/6279/6280	7
Brown	BP	GO:0042129	regulation of T cell proliferation	8/178	153/18493	0.00011893	0.00351169	0.00302655	383/912/1178/11151/10288/5777/6708/7037	8
Brown	BP	GO:0051702	interaction with symbiont	6/178	80/18493	0.00012178	0.00354842	0.00305821	383/566/820/1511/1991/4057	6
Brown	BP	GO:0006909	phagocytosis	12/178	342/18493	0.000122815	0.00354842	0.00305821	306/9938/566/11151/1535/1991/2219/51454/3055/3394/3683/4689	12
Brown	BP	GO:0045785	positive regulation of cell adhesion	13/178	397/18493	0.000127793	0.00365298	0.00314832	288/566/912/11151/1991/54566/3142/10288/4602/10562/5777/6708/7037	13
Brown	BP	GO:1903037	regulation of leukocyte cell-cell adhesion	11/178	293/18493	0.000131071	0.00370725	0.00319509	383/912/11151/1991/3142/10288/4602/26191/5777/6708/7037	11
Brown	BP	GO:0097529	myeloid leukocyte migration	9/178	199/18493	0.000135975	0.00374772	0.00322997	566/1441/1525/23765/4354/5473/6283/6279/6280	9
Brown	BP	GO:0002523	leukocyte migration involved in inflammatory response	3/178	11/18493	0.000136687	0.00374772	0.00322997	1991/6279/6280	3
Brown	BP	GO:0033197	response to vitamin E	3/178	11/18493	0.000136687	0.00374772	0.00322997	210/383/847	3
Brown	BP	GO:0034101	erythrocyte homeostasis	7/178	120/18493	0.000162224	0.004403	0.00379472	51327/212/669/2038/10661/6005/25893	7
Brown	BP	GO:0022409	positive regulation of cell-cell adhesion	10/178	251/18493	0.000164434	0.00441834	0.00380794	288/912/11151/1991/3142/10288/4602/5777/6708/7037	10
Brown	BP	GO:0002218	activation of innate immune response	10/178	252/18493	0.000169825	0.00451802	0.00389385	1535/2219/2672/3055/11027/4057/8993/26191/6279/6280	10
Brown	BP	GO:0070486	leukocyte aggregation	3/178	12/18493	0.00018096	0.00476704	0.00410847	6279/6280/6793	3
Brown	BP	GO:0050863	regulation of T cell activation	11/178	305/18493	0.000185979	0.00485171	0.00418144	383/912/1178/11151/3142/10288/4602/26191/5777/6708/7037	11
Brown	BP	GO:0098754	detoxification	7/178	123/18493	0.000189074	0.00488501	0.00421015	847/3043/3045/3240/26034/4353/6280	7
Brown	BP	GO:1903706	regulation of hemopoiesis	13/178	418/18493	0.000211883	0.00540191	0.00465564	760/1441/25793/3142/10288/4005/4057/4602/4778/8993/5777/54997/25893	13
Brown	BP	GO:0048821	erythrocyte development	4/178	31/18493	0.000213101	0.00540191	0.00465564	669/2038/6005/25893	4
Brown	BP	GO:0009635	response to herbicide	3/178	13/18493	0.000233584	0.00572437	0.00493355	210/383/3934	3
Brown	BP	GO:0010960	magnesium ion homeostasis	3/178	13/18493	0.000233584	0.00572437	0.00493355	288/3792/7504	3
Brown	BP	GO:0032536	regulation of cell projection size	3/178	13/18493	0.000233584	0.00572437	0.00493355	7430/3792/7504	3
Brown	BP	GO:1903039	positive regulation of leukocyte cell-cell adhesion	9/178	214/18493	0.000234343	0.00572437	0.00493355	912/11151/1991/3142/10288/4602/5777/6708/7037	9
Brown	BP	GO:0071353	cellular response to interleukin-4	4/178	32/18493	0.000241724	0.00585147	0.00504309	210/383/11151/9817	4
Brown	BP	GO:0015893	drug transport	9/178	217/18493	0.000259804	0.00619274	0.00533721	383/760/2352/3043/3045/26034/6005/6622/6947	9
Brown	BP	GO:0043900	regulation of multi-organism process	12/178	371/18493	0.000260432	0.00619274	0.00533721	383/820/1511/1535/1991/2219/3394/11027/4057/4277/4353/8993	12
Brown	BP	GO:0051235	maintenance of location	11/178	318/18493	0.000266372	0.00627843	0.00541106	288/11151/1535/7430/9817/8204/5777/6279/6280/6622/5552	11
Brown	BP	GO:0002224	toll-like receptor signaling pathway	7/178	131/18493	0.000278592	0.00650937	0.0056101	1535/2672/11027/4057/26191/6279/6280	7
Brown	BP	GO:0050830	defense response to Gram-positive bacterium	6/178	94/18493	0.000295331	0.00684099	0.0058959	820/1511/1669/4069/8993/6037	6
Brown	BP	GO:0002683	negative regulation of immune system process	13/178	437/18493	0.000325163	0.00746763	0.00643598	383/7430/25793/3142/11027/10288/7940/4057/4277/4332/8993/26191/5777	13
Brown	BP	GO:0002385	mucosal immune response	4/178	35/18493	0.000344139	0.00777061	0.00669709	820/1669/4057/6037	4
Brown	BP	GO:0070670	response to interleukin-4	4/178	35/18493	0.000344139	0.00777061	0.00669709	210/383/11151/9817	4
Brown	BP	GO:0046686	response to cadmium ion	5/178	63/18493	0.000349489	0.0078115	0.00673234	210/383/847/1528/653361	5
Brown	BP	GO:0072593	reactive oxygen species metabolic process	10/178	276/18493	0.000351765	0.0078115	0.00673234	847/1535/3043/3045/3240/4353/653361/4689/10394/6622	10
Brown	BP	GO:0015671	oxygen transport	3/178	15/18493	0.000366378	0.00806933	0.00695454	3043/3045/26034	3
Brown	BP	GO:0031343	positive regulation of cell killing	5/178	64/18493	0.000376183	0.00821792	0.00708261	383/912/8807/4277/8993	5
Brown	BP	GO:0002768	immune response-regulating cell surface receptor signaling pathway	13/178	445/18493	0.000386443	0.00837397	0.0072171	660/11119/915/114625/7430/2219/3055/11027/10288/4277/4332/26191/5777	13
Brown	BP	GO:0022407	regulation of cell-cell adhesion	12/178	388/18493	0.000390361	0.00839121	0.00723196	288/383/912/11151/1991/3142/10288/4602/26191/5777/6708/7037	12
Brown	BP	GO:0034121	regulation of toll-like receptor signaling pathway	5/178	65/18493	0.00040439	0.00862377	0.00743239	1535/2672/11027/4057/26191	5
Brown	BP	GO:0042737	drug catabolic process	7/178	140/18493	0.000417077	0.0088243	0.00760522	847/3043/3045/3240/4128/4353/6622	7
Brown	BP	GO:0002251	organ or tissue specific immune response	4/178	37/18493	0.00042763	0.0089769	0.00773673	820/1669/4057/6037	4
Brown	BP	GO:0042542	response to hydrogen peroxide	7/178	141/18493	0.000435358	0.00906828	0.00781549	383/847/3043/3240/8807/3934/4602	7
Brown	BP	GO:0034599	cellular response to oxidative stress	10/178	289/18493	0.000504658	0.0104309	0.00898986	383/847/1535/25793/8807/3934/4353/4602/653361/6622	10
Brown	BP	GO:0006801	superoxide metabolic process	5/178	69/18493	0.000533452	0.010841	0.00934331	1535/4353/653361/4689/10394	5
Brown	BP	GO:0002262	myeloid cell homeostasis	7/178	146/18493	0.000536603	0.010841	0.00934331	51327/212/669/2038/10661/6005/25893	7
Brown	BP	GO:0002706	regulation of lymphocyte mediated immunity	7/178	146/18493	0.000536603	0.010841	0.00934331	383/912/1178/8807/4277/5777/7037	7
Brown	BP	GO:0032945	negative regulation of mononuclear cell proliferation	5/178	70/18493	0.000570062	0.0113464	0.00977885	383/10288/7940/4332/5777	5
Brown	BP	GO:0050672	negative regulation of lymphocyte proliferation	5/178	70/18493	0.000570062	0.0113464	0.00977885	383/10288/7940/4332/5777	5
Brown	BP	GO:0060326	cell chemotaxis	10/178	295/18493	0.000591889	0.0116942	0.0100786	566/11151/1441/1525/23765/4354/5473/6283/6279/6280	10
Brown	BP	GO:0046916	cellular transition metal ion homeostasis	6/178	109/18493	0.000652392	0.0127955	0.0110278	212/3934/4057/6279/6280/7037	6
Brown	BP	GO:0016999	antibiotic metabolic process	7/178	152/18493	0.000681938	0.0132059	0.0113815	847/1535/3043/3045/3240/4353/6622	7
Brown	BP	GO:0048872	homeostasis of number of cells	9/178	248/18493	0.000685185	0.0132059	0.0113815	51327/212/669/11151/2038/10661/6005/6708/25893	9
Brown	BP	GO:0032637	interleukin-8 production	5/178	73/18493	0.000691255	0.0132059	0.0113815	1991/2219/11027/10394/26191	5
Brown	BP	GO:0002429	immune response-activating cell surface receptor signaling pathway	12/178	414/18493	0.000692977	0.0132059	0.0113815	660/11119/915/114625/7430/2219/3055/11027/4277/4332/26191/5777	12
Brown	BP	GO:0010038	response to metal ion	11/178	358/18493	0.000718922	0.0136038	0.0117244	210/288/383/760/847/1528/2235/653361/6279/6622/55503	11
Brown	BP	GO:0051817	modification of morphology or physiology of other organism involved in symbiotic interaction	6/178	112/18493	0.000752714	0.0140553	0.0121135	383/566/820/1511/1991/4057	6
Brown	BP	GO:0034143	regulation of toll-like receptor 4 signaling pathway	3/178	19/18493	0.000758473	0.0140553	0.0121135	11027/4057/26191	3
Brown	BP	GO:0050860	negative regulation of T cell receptor signaling pathway	3/178	19/18493	0.000758473	0.0140553	0.0121135	7430/26191/5777	3
Brown	BP	GO:0050870	positive regulation of T cell activation	8/178	202/18493	0.000772308	0.0142137	0.01225	912/11151/3142/10288/4602/5777/6708/7037	8
Brown	BP	GO:0070664	negative regulation of leukocyte proliferation	5/178	75/18493	0.000782122	0.0142963	0.0123213	383/10288/7940/4332/5777	5
Brown	BP	GO:0043903	regulation of symbiosis, encompassing mutualism through parasitism	8/178	203/18493	0.000797511	0.0144791	0.0124788	383/820/1511/1991/2219/3394/4057/4353	8
Brown	BP	GO:1902105	regulation of leukocyte differentiation	9/178	265/18493	0.00109363	0.0197221	0.0169974	760/25793/3142/10288/4057/4602/8993/5777/54997	9
Brown	BP	GO:0034123	positive regulation of toll-like receptor signaling pathway	3/178	22/18493	0.00118012	0.0210089	0.0181065	1535/4057/26191	3
Brown	BP	GO:0046677	response to antibiotic	10/178	323/18493	0.00118063	0.0210089	0.0181065	210/383/847/2235/3043/3240/8807/3934/4602/6279	10
Brown	BP	GO:0010288	response to lead ion	3/178	24/18493	0.00152926	0.0270337	0.023299	210/847/2235	3
Brown	BP	GO:0031341	regulation of cell killing	5/178	88/18493	0.00160592	0.0282032	0.0243069	383/912/8807/4277/8993	5
Brown	BP	GO:0050858	negative regulation of antigen receptor-mediated signaling pathway	3/178	25/18493	0.00172557	0.0301079	0.0259485	7430/26191/5777	3
Brown	BP	GO:0032635	interleukin-6 production	6/178	132/18493	0.00175962	0.030504	0.0262898	1535/8807/11027/10288/26191/5777	6
Brown	BP	GO:0030098	lymphocyte differentiation	10/178	344/18493	0.00188235	0.0324222	0.0279431	912/915/25793/3142/10288/4066/4602/8993/26191/5777	10
Brown	BP	GO:0001912	positive regulation of leukocyte mediated cytotoxicity	4/178	55/18493	0.00193051	0.032733	0.0282109	383/912/8807/4277	4
Brown	BP	GO:0010043	response to zinc ion	4/178	55/18493	0.00193051	0.032733	0.0282109	210/383/760/6279	4
Brown	BP	GO:0003081	regulation of systemic arterial blood pressure by renin-angiotensin	3/178	26/18493	0.00193694	0.032733	0.0282109	84909/1511/1535	3
Brown	BP	GO:0031663	lipopolysaccharide-mediated signaling pathway	4/178	56/18493	0.00206359	0.0346554	0.0298677	3055/11027/4057/26191	4
Brown	BP	GO:0042108	positive regulation of cytokine biosynthetic process	4/178	57/18493	0.00220287	0.0367647	0.0316856	566/1991/4050/10394	4
Brown	BP	GO:0042267	natural killer cell mediated cytotoxicity	4/178	58/18493	0.0023485	0.0389533	0.0335719	11151/8807/4277/5777	4
Brown	BP	GO:0009065	glutamine family amino acid catabolic process	3/178	28/18493	0.00240637	0.0396682	0.0341881	383/2746/23569	3
Brown	BP	GO:0042102	positive regulation of T cell proliferation	5/178	97/18493	0.00246506	0.0403879	0.0348083	912/11151/10288/6708/7037	5
Brown	BP	GO:0031330	negative regulation of cellular catabolic process	8/178	245/18493	0.00261977	0.0426626	0.0367687	210/1942/8925/3240/10128/26191/6201/6622	8
Brown	BP	GO:0001819	positive regulation of cytokine production	11/178	422/18493	0.00265348	0.0429512	0.0370174	566/1535/1991/2219/23765/3394/10288/4050/4602/10394/26191	11
Brown	BP	GO:0002822	regulation of adaptive immune response based on somatic recombination of immune receptors built from immunoglobulin superfamily domains	6/178	144/18493	0.00272535	0.0438505	0.0377925	383/912/1178/3142/5777/7037	6
Brown	BP	GO:0051092	positive regulation of NF-kappaB transcription factor activity	6/178	146/18493	0.00291866	0.0466812	0.0402321	847/8807/4057/6283/6279/6280	6
Brown	BP	GO:0002703	regulation of leukocyte mediated immunity	7/178	196/18493	0.0029361	0.0466823	0.0402331	383/912/1178/8807/4277/5777/7037	7
Brown	BP	GO:0002228	natural killer cell mediated immunity	4/178	62/18493	0.0029974	0.0470994	0.0405926	11151/8807/4277/5777	4
Brown	BP	GO:0006879	cellular iron ion homeostasis	4/178	62/18493	0.0029974	0.0470994	0.0405926	212/3934/4057/7037	4
Brown	BP	GO:0002456	T cell mediated immunity	5/178	102/18493	0.00306585	0.047895	0.0412783	383/912/1178/8807/4277	5
Brown	CC	GO:0060205	cytoplasmic vesicle lumen	34/180	338/19659	1.16787e-25	1.95215e-23	1.63442e-23	210/383/566/820/847/978/1511/1669/1991/2219/2352/25801/3043/3101/3240/3934/4057/4069/4332/4353/10562/8993/5473/10394/5777/25797/6036/6037/6283/6279/6280/1992/5552/6947	34
Brown	CC	GO:0031983	vesicle lumen	34/180	339/19659	1.28855e-25	1.95215e-23	1.63442e-23	210/383/566/820/847/978/1511/1669/1991/2219/2352/25801/3043/3101/3240/3934/4057/4069/4332/4353/10562/8993/5473/10394/5777/25797/6036/6037/6283/6279/6280/1992/5552/6947	34
Brown	CC	GO:0034774	secretory granule lumen	33/180	321/19659	3.21887e-25	3.25106e-23	2.72192e-23	210/383/566/820/847/978/1511/1669/1991/2219/2352/25801/3101/3240/3934/4057/4069/4332/4353/10562/8993/5473/10394/5777/25797/6036/6037/6283/6279/6280/1992/5552/6947	33
Brown	CC	GO:0042581	specific granule	23/180	160/19659	3.88589e-21	2.94356e-19	2.46447e-19	306/383/820/1088/1535/1669/1991/2352/3240/3683/3934/11026/4057/4069/932/10562/8993/10394/5777/25797/9522/6793/6947	23
Brown	CC	GO:0035580	specific granule lumen	15/180	62/19659	9.43748e-18	5.71911e-16	4.78828e-16	383/820/1669/1991/2352/3240/3934/4057/4069/10562/8993/10394/5777/25797/6947	15
Brown	CC	GO:1904724	tertiary granule lumen	14/180	55/19659	5.47677e-17	2.76577e-15	2.31562e-15	820/978/2352/3043/3240/4057/4069/10562/8993/5473/10394/5777/25797/6947	14
Brown	CC	GO:0070820	tertiary granule	18/180	164/19659	1.18732e-14	5.1394e-13	4.30292e-13	820/978/1088/1535/2352/3043/3240/11026/10288/4057/4069/10562/8993/5473/10394/5777/25797/6947	18
Brown	CC	GO:0005766	primary lysosome	14/180	155/19659	1.64819e-10	5.54891e-09	4.64578e-09	383/566/1088/1511/1669/1991/25801/11010/4033/4069/4332/4353/6036/6037	14
Brown	CC	GO:0042582	azurophil granule	14/180	155/19659	1.64819e-10	5.54891e-09	4.64578e-09	383/566/1088/1511/1669/1991/25801/11010/4033/4069/4332/4353/6036/6037	14
Brown	CC	GO:0035578	azurophil granule lumen	10/180	91/19659	1.09153e-08	3.30733e-07	2.76904e-07	383/566/1511/1991/25801/4069/4332/4353/6036/6037	10
Brown	CC	GO:0005775	vacuolar lumen	11/180	171/19659	5.18011e-07	1.42689e-05	1.19465e-05	383/566/10675/1511/1991/25801/4069/4332/4353/6036/6037	11
Brown	CC	GO:0101002	ficolin-1-rich granule	11/180	185/19659	1.13049e-06	2.85449e-05	2.38989e-05	210/847/978/2219/3043/3101/11026/10288/4332/5553/25797	11
Brown	CC	GO:1904813	ficolin-1-rich granule lumen	9/180	124/19659	2.12836e-06	4.96072e-05	4.15332e-05	210/847/978/2219/3043/3101/4332/5553/25797	9
Brown	CC	GO:0030667	secretory granule membrane	13/180	295/19659	3.4463e-06	7.45877e-05	6.24479e-05	566/1088/1535/2215/11010/3683/11026/10288/4033/932/9522/6622/6793	13
Brown	CC	GO:0045335	phagocytic vesicle	8/180	124/19659	1.88526e-05	0.000380822	0.00031884	306/155066/11151/1535/4057/653361/4689/8993	8
Brown	CC	GO:0035579	specific granule membrane	7/180	91/19659	2.03331e-05	0.000385059	0.000322387	1088/1535/3683/11026/932/9522/6793	7
Brown	CC	GO:0071682	endocytic vesicle lumen	4/180	19/19659	2.36614e-05	0.00042173	0.00035309	3043/3240/4057/8993	4
Brown	CC	GO:0005884	actin filament	7/180	99/19659	3.51713e-05	0.000592051	0.000495689	395/23242/11151/7430/3055/9817/9050	7
Brown	CC	GO:0030863	cortical cytoskeleton	7/180	102/19659	4.26367e-05	0.000679943	0.000569276	11151/2038/7430/2995/4354/6521/6708	7
Brown	CC	GO:0031838	haptoglobin-hemoglobin complex	3/180	11/19659	0.000118005	0.00178778	0.0014968	3043/3045/3240	3
Brown	CC	GO:0005833	hemoglobin complex	3/180	12/19659	0.000156281	0.00215242	0.0018021	51327/3043/3045	3
Brown	CC	GO:0043020	NADPH oxidase complex	3/180	12/19659	0.000156281	0.00215242	0.0018021	1535/653361/4689	3
Brown	CC	GO:0030139	endocytic vesicle	10/180	293/19659	0.000382331	0.00503679	0.00421701	306/155066/11151/1535/3043/3240/4057/653361/4689/8993	10
Brown	CC	GO:0015629	actin cytoskeleton	13/180	483/19659	0.000525496	0.00663439	0.00555459	31/395/23242/11151/1535/7430/3055/10625/9817/4542/9050/6622/6708	13
Brown	CC	GO:0016323	basolateral plasma membrane	8/180	213/19659	0.000791808	0.00959671	0.00803476	288/760/912/1525/7430/6563/6521/7037	8
Brown	CC	GO:0044448	cell cortex part	7/180	168/19659	0.000920591	0.0107284	0.00898228	11151/2038/7430/2995/4354/6521/6708	7
Brown	CC	GO:0005938	cell cortex	9/180	292/19659	0.00152164	0.0170761	0.0142969	23242/11151/2038/7430/2995/4354/6521/6622/6708	9
Brown	CC	GO:0035577	azurophil granule membrane	4/180	58/19659	0.00196175	0.0212289	0.0177738	566/1088/11010/4033	4
Brown	CC	GO:0009898	cytoplasmic side of plasma membrane	6/180	149/19659	0.00252791	0.0264123	0.0221135	7430/10160/3055/26191/5778/6708	6
Brown	CC	GO:0062023	collagen-containing extracellular matrix	9/180	332/19659	0.00359984	0.0363584	0.0304408	1178/1511/1991/2219/5553/10394/6279/6280/1992	9
Brown	CC	GO:0030426	growth cone	6/180	165/19659	0.0041787	0.0403384	0.033773	23242/1525/81544/23046/6622/66008	6
Brown	CC	GO:0030670	phagocytic vesicle membrane	4/180	72/19659	0.00430868	0.0403384	0.033773	306/155066/11151/1535	4
Brown	CC	GO:0030427	site of polarized growth	6/180	167/19659	0.00443046	0.0403384	0.033773	23242/1525/81544/23046/6622/66008	6
Brown	CC	GO:0070821	tertiary granule membrane	4/180	73/19659	0.00452642	0.0403384	0.033773	1088/1535/11026/10288	4
Brown	CC	GO:0098562	cytoplasmic side of membrane	6/180	172/19659	0.0051087	0.0442267	0.0370285	7430/10160/3055/26191/5778/6708	6
Brown	MF	GO:0016209	antioxidant activity	7/175	86/17632	2.33766e-05	0.00981817	0.00868625	847/3043/3045/3240/26034/4353/6280	7
Brown	MF	GO:0050786	RAGE receptor binding	3/175	11/17632	0.000149558	0.0193795	0.0171452	6283/6279/6280	3
Brown	MF	GO:0004601	peroxidase activity	5/175	52/17632	0.000162071	0.0193795	0.0171452	847/3043/3045/26034/4353	5
Brown	MF	GO:0043177	organic acid binding	9/175	204/17632	0.000205092	0.0193795	0.0171452	212/2219/2352/2746/3043/3045/23569/6279/6280	9
Brown	MF	GO:0016684	oxidoreductase activity, acting on peroxide as acceptor	5/175	56/17632	0.000230708	0.0193795	0.0171452	847/3043/3045/26034/4353	5
Brown	MF	GO:0005344	oxygen carrier activity	3/175	14/17632	0.000322773	0.0225941	0.0199893	3043/3045/26034	3
Brown	MF	GO:0046906	tetrapyrrole binding	7/175	141/17632	0.000521121	0.0312672	0.0276625	847/1528/1535/3043/3045/4353/6947	7
Brown	MF	GO:0016810	hydrolase activity, acting on carbon-nitrogen (but not peptide) bonds	7/175	147/17632	0.000668069	0.0350736	0.0310301	383/847/978/23569/8993/8875/55093	7
Brown	MF	GO:0140104	molecular carrier activity	4/175	43/17632	0.000855501	0.0399234	0.0353207	3043/3045/26034/23039	4
Blue	BP	GO:0045333	cellular respiration	20/238	176/18493	1.28531e-13	4.04488e-10	3.75717e-10	50/55847/57017/1337/1350/1537/54205/4191/4697/4702/4708/4710/4711/4729/5018/9512/8802/8801/7381/27089	20
Blue	BP	GO:0022900	electron transport chain	19/238	182/18493	2.48831e-12	3.12044e-09	2.89849e-09	57017/1337/1345/1349/1350/1351/1537/54205/4697/4702/4708/4710/4711/4729/26227/9512/7358/7381/27089	19
Blue	BP	GO:0006091	generation of precursor metabolites and energy	29/238	471/18493	2.97468e-12	3.12044e-09	2.89849e-09	50/55847/57017/1337/1345/1349/1350/1351/1537/54205/2597/2673/4191/4697/4702/4708/4710/4711/4729/5018/5209/26227/5313/9512/8802/8801/7358/7381/27089	29
Blue	BP	GO:0042775	mitochondrial ATP synthesis coupled electron transport	14/238	86/18493	4.65546e-12	3.45259e-09	3.20701e-09	57017/1337/1350/1537/54205/4697/4702/4708/4710/4711/4729/9512/7381/27089	14
Blue	BP	GO:0042773	ATP synthesis coupled electron transport	14/238	87/18493	5.48553e-12	3.45259e-09	3.20701e-09	57017/1337/1350/1537/54205/4697/4702/4708/4710/4711/4729/9512/7381/27089	14
Blue	BP	GO:0009150	purine ribonucleotide metabolic process	28/238	488/18493	3.82463e-11	1.79076e-08	1.66339e-08	57017/1337/1350/1537/54205/1622/201163/2597/2954/3094/3295/4338/4697/4702/4708/4710/4711/4729/4830/9061/5209/5313/9512/8802/8801/6817/7381/27089	28
Blue	BP	GO:0015980	energy derivation by oxidation of organic compounds	21/238	267/18493	3.98326e-11	1.79076e-08	1.66339e-08	50/55847/57017/1337/1350/1537/54205/2673/4191/4697/4702/4708/4710/4711/4729/5018/9512/8802/8801/7381/27089	21
Blue	BP	GO:0022904	respiratory electron transport chain	14/238	104/18493	6.64653e-11	2.61458e-08	2.42861e-08	57017/1337/1350/1537/54205/4697/4702/4708/4710/4711/4729/9512/7381/27089	14
Blue	BP	GO:0009141	nucleoside triphosphate metabolic process	22/238	307/18493	8.21879e-11	2.87384e-08	2.66942e-08	57017/1337/1350/1537/54205/79077/201163/2597/4338/4697/4702/4708/4710/4711/4729/4830/5209/5313/9512/8802/7381/27089	22
Blue	BP	GO:0009205	purine ribonucleoside triphosphate metabolic process	20/238	280/18493	6.52222e-10	2.05254e-07	1.90655e-07	57017/1337/1350/1537/54205/201163/2597/4338/4697/4702/4708/4710/4711/4729/4830/5209/5313/9512/7381/27089	20
Blue	BP	GO:0006119	oxidative phosphorylation	14/238	126/18493	8.96927e-10	2.4311e-07	2.25818e-07	57017/1337/1350/1537/54205/4697/4702/4708/4710/4711/4729/9512/7381/27089	14
Blue	BP	GO:0009199	ribonucleoside triphosphate metabolic process	20/238	286/18493	9.44966e-10	2.4311e-07	2.25818e-07	57017/1337/1350/1537/54205/201163/2597/4338/4697/4702/4708/4710/4711/4729/4830/5209/5313/9512/7381/27089	20
Blue	BP	GO:0009144	purine nucleoside triphosphate metabolic process	20/238	287/18493	1.00427e-09	2.4311e-07	2.25818e-07	57017/1337/1350/1537/54205/201163/2597/4338/4697/4702/4708/4710/4711/4729/4830/5209/5313/9512/7381/27089	20
Blue	BP	GO:0046034	ATP metabolic process	18/238	250/18493	4.25202e-09	9.55794e-07	8.8781e-07	57017/1337/1350/1537/54205/201163/2597/4697/4702/4708/4710/4711/4729/5209/5313/9512/7381/27089	18
Blue	BP	GO:0070125	mitochondrial translational elongation	11/238	88/18493	1.70516e-08	3.57742e-06	3.32296e-06	79590/11222/9553/64976/28977/64960/28957/51650/65993/60488/5018	11
Blue	BP	GO:0070126	mitochondrial translational termination	11/238	89/18493	1.92378e-08	3.78384e-06	3.5147e-06	79590/11222/9553/64976/28977/64960/28957/51650/65993/60488/5018	11
Blue	BP	GO:0032543	mitochondrial translation	13/238	135/18493	2.09104e-08	3.87089e-06	3.59556e-06	55699/79590/11222/9553/64976/28977/64960/28957/51650/65993/60488/4528/5018	13
Blue	BP	GO:0009167	purine ribonucleoside monophosphate metabolic process	18/238	286/18493	3.44539e-08	6.01957e-06	5.5914e-06	57017/1337/1350/1537/54205/201163/2597/4697/4702/4708/4710/4711/4729/5209/5313/9512/7381/27089	18
Blue	BP	GO:0009126	purine nucleoside monophosphate metabolic process	18/238	287/18493	3.63431e-08	6.01957e-06	5.5914e-06	57017/1337/1350/1537/54205/201163/2597/4697/4702/4708/4710/4711/4729/5209/5313/9512/7381/27089	18
Blue	BP	GO:0009161	ribonucleoside monophosphate metabolic process	18/238	300/18493	7.12661e-08	1.09574e-05	1.0178e-05	57017/1337/1350/1537/54205/201163/2597/4697/4702/4708/4710/4711/4729/5209/5313/9512/7381/27089	18
Blue	BP	GO:0006415	translational termination	11/238	101/18493	7.31191e-08	1.09574e-05	1.0178e-05	79590/11222/9553/64976/28977/64960/28957/51650/65993/60488/5018	11
Blue	BP	GO:0009060	aerobic respiration	10/238	80/18493	7.7236e-08	1.10483e-05	1.02624e-05	50/1337/1350/54205/4191/5018/9512/8802/8801/7381	10
Blue	BP	GO:0140053	mitochondrial gene expression	13/238	159/18493	1.46587e-07	2.00569e-05	1.86303e-05	55699/79590/11222/9553/64976/28977/64960/28957/51650/65993/60488/4528/5018	13
Blue	BP	GO:0009123	nucleoside monophosphate metabolic process	18/238	322/18493	2.05594e-07	2.69585e-05	2.50409e-05	57017/1337/1350/1537/54205/201163/2597/4697/4702/4708/4710/4711/4729/5209/5313/9512/7381/27089	18
Blue	BP	GO:0043624	cellular protein complex disassembly	14/238	210/18493	5.98584e-07	7.46247e-05	6.93167e-05	11034/64780/79590/11222/9553/64976/28977/64960/28957/51650/65993/60488/5018/5756	14
Blue	BP	GO:0006122	mitochondrial electron transport, ubiquinol to cytochrome c	5/238	14/18493	6.16537e-07	7.46247e-05	6.93167e-05	1537/54205/9512/7381/27089	5
Blue	BP	GO:0006414	translational elongation	11/238	134/18493	1.30337e-06	0.000151915	0.00014111	79590/11222/9553/64976/28977/64960/28957/51650/65993/60488/5018	11
Blue	BP	GO:0006120	mitochondrial electron transport, NADH to ubiquinone	7/238	48/18493	2.51544e-06	0.000282718	0.000262608	57017/4697/4702/4708/4710/4711/4729	7
Blue	BP	GO:0006107	oxaloacetate metabolic process	4/238	11/18493	8.22297e-06	0.000892335	0.000828864	2806/4191/56954/6776	4
Blue	BP	GO:0009226	nucleotide-sugar biosynthetic process	5/238	23/18493	9.4263e-06	0.000988819	0.000918485	2673/2762/4351/54187/7358	5
Blue	BP	GO:0006986	response to unfolded protein	11/238	169/18493	1.23389e-05	0.0012526	0.0011635	1663/79139/51009/2673/3326/3309/3313/3336/10130/23645/58477	11
Blue	BP	GO:0032984	protein-containing complex disassembly	15/238	317/18493	1.62758e-05	0.00160062	0.00148677	11034/64780/79590/11222/9553/64976/28977/64960/28957/51650/65993/60488/4528/5018/5756	15
Blue	BP	GO:0010257	NADH dehydrogenase complex assembly	7/238	64/18493	1.78206e-05	0.00164945	0.00153213	4702/25915/4708/4710/4711/4729/5018	7
Blue	BP	GO:0032981	mitochondrial respiratory chain complex I assembly	7/238	64/18493	1.78206e-05	0.00164945	0.00153213	4702/25915/4708/4710/4711/4729/5018	7
Blue	BP	GO:0006790	sulfur compound metabolic process	16/238	362/18493	1.97001e-05	0.00177132	0.00164533	9334/1622/2729/79017/2954/3295/3313/4258/64780/9061/5096/26227/6776/8802/8801/6817	16
Blue	BP	GO:0006520	cellular amino acid metabolic process	15/238	324/18493	2.10134e-05	0.00183693	0.00170627	501/384/219595/2729/2673/2806/2954/26275/55699/56954/5033/26227/27068/10549/6776	15
Blue	BP	GO:0071480	cellular response to gamma radiation	5/238	28/18493	2.61234e-05	0.0022219	0.00206386	598/404672/3014/3309/10413	5
Blue	BP	GO:0033108	mitochondrial respiratory chain complex assembly	8/238	95/18493	3.10403e-05	0.00257063	0.00238778	4702/25915/4708/4710/4711/4729/5018/7381	8
Blue	BP	GO:1901605	alpha-amino acid metabolic process	12/238	223/18493	3.35027e-05	0.00270341	0.00251112	501/384/2729/2673/2806/2954/26275/56954/5033/26227/10549/6776	12
Blue	BP	GO:0035966	response to topologically incorrect protein	11/238	189/18493	3.49566e-05	0.00275021	0.00255459	1663/79139/51009/2673/3326/3309/3313/3336/10130/23645/58477	11
Blue	BP	GO:0034620	cellular response to unfolded protein	9/238	133/18493	5.67776e-05	0.00435803	0.00404804	1663/79139/51009/2673/3309/3313/10130/23645/58477	9
Blue	BP	GO:0010332	response to gamma radiation	6/238	53/18493	5.90627e-05	0.00442548	0.0041107	598/404672/3014/3309/5423/10413	6
Blue	BP	GO:0006101	citrate metabolic process	5/238	37/18493	0.000105434	0.00754092	0.00700454	50/4191/6776/8802/8801	5
Blue	BP	GO:0009225	nucleotide-sugar metabolic process	5/238	37/18493	0.000105434	0.00754092	0.00700454	2673/2762/4351/54187/7358	5
Blue	BP	GO:0006457	protein folding	11/238	218/18493	0.000126332	0.00880847	0.00818193	10575/22948/79139/2288/3326/3309/3313/3336/10130/10549/6902	11
Blue	BP	GO:0030968	endoplasmic reticulum unfolded protein response	8/238	116/18493	0.000128754	0.00880847	0.00818193	1663/79139/51009/2673/3309/10130/23645/58477	8
Blue	BP	GO:0035967	cellular response to topologically incorrect protein	9/238	151/18493	0.000150727	0.0100923	0.00937445	1663/79139/51009/2673/3309/3313/10130/23645/58477	9
Blue	BP	GO:0044282	small molecule catabolic process	16/238	431/18493	0.000154806	0.0101495	0.00942758	35/501/384/51302/1892/2597/2806/2954/26275/3295/3628/9663/5194/5313/6342/6817	16
Blue	BP	GO:0016054	organic acid catabolic process	12/238	265/18493	0.000173745	0.0107266	0.00996359	35/501/384/51302/1892/2806/2954/26275/3295/9663/5194/6342	12
Blue	BP	GO:0046395	carboxylic acid catabolic process	12/238	265/18493	0.000173745	0.0107266	0.00996359	35/501/384/51302/1892/2806/2954/26275/3295/9663/5194/6342	12
Blue	BP	GO:0072350	tricarboxylic acid metabolic process	5/238	41/18493	0.000173834	0.0107266	0.00996359	50/4191/6776/8802/8801	5
Blue	BP	GO:1902600	proton transmembrane transport	9/238	162/18493	0.000255515	0.0154636	0.0143637	27032/51606/1337/1345/1349/1350/1351/1537/4697	9
Blue	BP	GO:0072329	monocarboxylic acid catabolic process	8/238	129/18493	0.000267807	0.0159017	0.0147706	35/51302/1892/26275/3295/9663/5194/6342	8
Blue	BP	GO:0006105	succinate metabolic process	3/238	12/18493	0.000424974	0.0247665	0.0230049	6776/8802/8801	3
Blue	BP	GO:0009062	fatty acid catabolic process	7/238	106/18493	0.000442825	0.0253377	0.0235354	35/1892/26275/3295/9663/5194/6342	7
Blue	BP	GO:0009064	glutamine family amino acid metabolic process	6/238	78/18493	0.000505833	0.028426	0.0264041	384/2729/2673/2806/56954/26227	6
Blue	BP	GO:0033151	V(D)J recombination	3/238	13/18493	0.000547228	0.0302128	0.0280638	64421/5423/6929	3
Blue	BP	GO:0043648	dicarboxylic acid metabolic process	7/238	112/18493	0.000616882	0.0334712	0.0310904	2729/2806/4191/56954/6776/8802/8801	7
Blue	BP	GO:0034976	response to endoplasmic reticulum stress	11/238	264/18493	0.000648801	0.0342583	0.0318216	57003/1663/79139/51009/2673/3309/3725/10130/23645/58477/7706	11
Blue	BP	GO:0006732	coenzyme metabolic process	13/238	351/18493	0.000653162	0.0342583	0.0318216	57017/1622/2597/2729/2954/3295/4191/4338/5096/5209/5313/8802/8801	13
Blue	BP	GO:0016999	antibiotic metabolic process	8/238	152/18493	0.000800207	0.0412828	0.0383464	50/4191/5052/10549/6776/8802/8801/6817	8
Blue	BP	GO:0006099	tricarboxylic acid cycle	4/238	33/18493	0.000816371	0.0413553	0.0384138	50/4191/8802/8801	4
Blue	BP	GO:0006123	mitochondrial electron transport, cytochrome c to oxygen	3/238	15/18493	0.000854177	0.0413553	0.0384138	1337/1350/54205	3
Blue	BP	GO:0019471	4-hydroxyproline metabolic process	3/238	15/18493	0.000854177	0.0413553	0.0384138	2806/5033/10549	3
Blue	BP	GO:0019646	aerobic electron transport chain	3/238	15/18493	0.000854177	0.0413553	0.0384138	1337/1350/54205	3
Blue	CC	GO:0005743	mitochondrial inner membrane	32/238	463/19659	1.55126e-15	6.12749e-13	5.20898e-13	598/57017/1337/1345/1349/1350/1351/1537/54205/2806/79590/11222/9553/64976/28977/64960/28957/51650/65993/60488/4697/4702/25915/4708/4710/4711/4729/5018/9512/10166/7381/27089	32
Blue	CC	GO:0005759	mitochondrial matrix	31/238	462/19659	1.00018e-14	1.97535e-12	1.67925e-12	35/50/501/384/598/1892/2806/2954/26275/3313/3336/55699/4191/4285/79590/11222/9553/64976/28977/64960/28957/51650/65993/60488/5018/5096/9512/27068/6742/8802/8801	31
Blue	CC	GO:0098798	mitochondrial protein complex	24/238	271/19659	3.07387e-14	4.04726e-12	3.44058e-12	1337/1350/1537/79590/11222/9553/64976/28977/64960/28957/51650/65993/60488/4697/4702/4708/4710/4711/4729/9512/8802/8801/7381/27089	24
Blue	CC	GO:0070469	respiratory chain	16/238	103/19659	1.13271e-13	1.11855e-11	9.50877e-12	1337/1349/1350/1351/1537/54205/4697/4702/4708/4710/4711/4729/5018/9512/7381/27089	16
Blue	CC	GO:0098803	respiratory chain complex	14/238	88/19659	2.88045e-12	2.27556e-10	1.93445e-10	1337/1349/1350/1351/1537/4697/4702/4708/4710/4711/4729/9512/7381/27089	14
Blue	CC	GO:0005746	mitochondrial respiratory chain	14/238	93/19659	6.29637e-12	4.14511e-10	3.52376e-10	1337/1349/1350/1537/4697/4702/4708/4710/4711/4729/5018/9512/7381/27089	14
Blue	CC	GO:0070069	cytochrome complex	9/238	36/19659	3.40173e-10	1.91955e-08	1.63181e-08	1337/1349/1350/1351/1537/4697/9512/7381/27089	9
Blue	CC	GO:1990204	oxidoreductase complex	11/238	110/19659	9.66546e-08	3.91428e-06	3.32753e-06	1537/4697/4702/4708/4710/4711/4729/5033/9512/7381/27089	11
Blue	CC	GO:0000313	organellar ribosome	10/238	87/19659	9.90957e-08	3.91428e-06	3.32753e-06	79590/11222/9553/64976/28977/64960/28957/51650/65993/60488	10
Blue	CC	GO:0005761	mitochondrial ribosome	10/238	87/19659	9.90957e-08	3.91428e-06	3.32753e-06	79590/11222/9553/64976/28977/64960/28957/51650/65993/60488	10
Blue	CC	GO:0098800	inner mitochondrial membrane protein complex	12/238	144/19659	1.90349e-07	6.83527e-06	5.81066e-06	1337/1350/1537/4697/4702/4708/4710/4711/4729/9512/7381/27089	12
Blue	CC	GO:0000314	organellar small ribosomal subunit	6/238	28/19659	8.91023e-07	2.70734e-05	2.30151e-05	28977/64960/28957/51650/65993/60488	6
Blue	CC	GO:0005763	mitochondrial small ribosomal subunit	6/238	28/19659	8.91023e-07	2.70734e-05	2.30151e-05	28977/64960/28957/51650/65993/60488	6
Blue	CC	GO:0044455	mitochondrial membrane part	14/238	234/19659	1.07074e-06	3.02102e-05	2.56817e-05	1337/1349/1350/1537/4697/4702/4708/4710/4711/4729/5018/9512/7381/27089	14
Blue	CC	GO:0045277	respiratory chain complex IV	5/238	21/19659	4.33127e-06	0.000114057	9.69598e-05	1337/1349/1350/1351/4697	5
Blue	CC	GO:0044391	ribosomal subunit	11/238	191/19659	2.21651e-05	0.0005472	0.000465175	79590/11222/9553/64976/28977/64960/28957/51650/65993/60488/51121	11
Blue	CC	GO:0005750	mitochondrial respiratory chain complex III	4/238	15/19659	2.57448e-05	0.000564956	0.000480269	1537/9512/7381/27089	4
Blue	CC	GO:0045275	respiratory chain complex III	4/238	15/19659	2.57448e-05	0.000564956	0.000480269	1537/9512/7381/27089	4
Blue	CC	GO:0043209	myelin sheath	10/238	162/19659	2.9031e-05	0.000603539	0.000513069	50/22948/2806/3309/4191/4729/4830/26227/5052/7316	10
Blue	CC	GO:0005747	mitochondrial respiratory chain complex I	6/238	51/19659	3.37564e-05	0.000606081	0.000515229	4697/4702/4708/4710/4711/4729	6
Blue	CC	GO:0030964	NADH dehydrogenase complex	6/238	51/19659	3.37564e-05	0.000606081	0.000515229	4697/4702/4708/4710/4711/4729	6
Blue	CC	GO:0045271	respiratory chain complex I	6/238	51/19659	3.37564e-05	0.000606081	0.000515229	4697/4702/4708/4710/4711/4729	6
Blue	CC	GO:0042470	melanosome	8/238	106/19659	4.46102e-05	0.000734209	0.000624151	813/10575/3326/3309/10130/5052/9367/10972	8
Blue	CC	GO:0048770	pigment granule	8/238	106/19659	4.46102e-05	0.000734209	0.000624151	813/10575/3326/3309/10130/5052/9367/10972	8
Blue	CC	GO:0015935	small ribosomal subunit	6/238	73/19659	0.000255686	0.00403984	0.00343427	28977/64960/28957/51650/65993/60488	6
Blue	CC	GO:0008250	oligosaccharyltransferase complex	3/238	12/19659	0.000355563	0.00540182	0.00459208	1603/6185/7991	3
Blue	CC	GO:0005840	ribosome	11/238	276/19659	0.000568629	0.00831883	0.00707184	79590/11222/9553/64976/28977/64960/28957/51650/65993/60488/51121	11
Blue	CC	GO:0000315	organellar large ribosomal subunit	5/238	57/19659	0.000625292	0.00851691	0.00724022	79590/11222/9553/64976/28977	5
Blue	CC	GO:0005762	mitochondrial large ribosomal subunit	5/238	57/19659	0.000625292	0.00851691	0.00724022	79590/11222/9553/64976/28977	5
Blue	CC	GO:0005793	endoplasmic reticulum-Golgi intermediate compartment	7/238	123/19659	0.000754202	0.00993033	0.00844177	290/51290/3309/90411/10130/10972/10959	7
Blue	CC	GO:0005751	mitochondrial respiratory chain complex IV	3/238	16/19659	0.000873229	0.0111266	0.00945875	1337/1350/4697	3
Blue	CC	GO:0101031	chaperone complex	3/238	20/19659	0.00171525	0.0211727	0.0179989	10575/22948/3326	3
Blue	CC	GO:0015934	large ribosomal subunit	6/238	121/19659	0.00357309	0.0427688	0.0363578	79590/11222/9553/64976/28977/51121	6
Blue	MF	GO:0009055	electron transfer activity	13/235	114/17632	3.96278e-09	1.99328e-06	1.79368e-06	1337/1345/1349/1350/1351/1537/54205/4697/4729/26227/7358/7381/27089	13
Blue	MF	GO:0004129	cytochrome-c oxidase activity	6/235	29/17632	1.93247e-06	0.000240314	0.00021625	1337/1345/1349/1350/1351/4697	6
Blue	MF	GO:0015002	heme-copper terminal oxidase activity	6/235	29/17632	1.93247e-06	0.000240314	0.00021625	1337/1345/1349/1350/1351/4697	6
Blue	MF	GO:0016676	oxidoreductase activity, acting on a heme group of donors, oxygen as acceptor	6/235	29/17632	1.93247e-06	0.000240314	0.00021625	1337/1345/1349/1350/1351/4697	6
Blue	MF	GO:0016675	oxidoreductase activity, acting on a heme group of donors	6/235	30/17632	2.38881e-06	0.000240314	0.00021625	1337/1345/1349/1350/1351/4697	6
Blue	MF	GO:0048037	cofactor binding	20/235	495/17632	1.12413e-05	0.000942396	0.000848028	35/50/55847/1537/54205/51302/1622/1663/2597/2729/2762/2806/23593/64780/4729/5033/26227/6342/8802/7358	20
Blue	MF	GO:0008137	NADH dehydrogenase (ubiquinone) activity	6/235	46/17632	3.15364e-05	0.00198285	0.0017843	4697/4702/4708/4710/4711/4729	6
Blue	MF	GO:0050136	NADH dehydrogenase (quinone) activity	6/235	46/17632	3.15364e-05	0.00198285	0.0017843	4697/4702/4708/4710/4711/4729	6
Blue	MF	GO:0003954	NADH dehydrogenase activity	6/235	47/17632	3.57521e-05	0.00199814	0.00179806	4697/4702/4708/4710/4711/4729	6
Blue	MF	GO:0016655	oxidoreductase activity, acting on NAD(P)H, quinone or similar compound as acceptor	6/235	60/17632	0.000144307	0.00725862	0.00653177	4697/4702/4708/4710/4711/4729	6
Blue	MF	GO:0004576	oligosaccharyl transferase activity	3/235	10/17632	0.000261753	0.0119693	0.0107707	1603/6185/7991	3
Blue	MF	GO:0015078	proton transmembrane transporter activity	8/235	137/17632	0.000505448	0.0211867	0.0190651	27032/51606/1337/1345/1349/1350/1351/4697	8
Blue	MF	GO:0043024	ribosomal small subunit binding	3/235	16/17632	0.00115135	0.0445483	0.0400874	4528/4830/5292	3
Black	BP	GO:0030198	extracellular matrix organization	12/46	348/18493	3.57689e-11	4.75369e-08	3.92705e-08	1301/1278/1281/1282/1293/2335/3685/4060/5175/5352/10631/6696	12
Black	BP	GO:0043062	extracellular structure organization	12/46	402/18493	1.88853e-10	1.25493e-07	1.03671e-07	1301/1278/1281/1282/1293/2335/3685/4060/5175/5352/10631/6696	12
Black	BP	GO:0030199	collagen fibril organization	5/46	52/18493	1.81296e-07	8.0314e-05	6.63479e-05	1301/1278/1281/4060/5352	5
Black	BP	GO:0007265	Ras protein signal transduction	7/46	430/18493	8.55686e-05	0.0284302	0.0234863	1026/1278/1281/5175/5587/64284/11031	7
Black	BP	GO:0031589	cell-substrate adhesion	6/46	338/18493	0.000180336	0.0415424	0.0343184	1281/2335/3685/5175/10631/6251	6
Black	BP	GO:0035987	endodermal cell differentiation	3/46	45/18493	0.000189959	0.0415424	0.0343184	1301/2335/3685	3
Black	BP	GO:0007160	cell-matrix adhesion	5/46	222/18493	0.000218809	0.0415424	0.0343184	1281/2335/3685/5175/10631	5
Black	BP	GO:0001706	endoderm formation	3/46	50/18493	0.000260109	0.0432106	0.0356965	1301/2335/3685	3
Black	CC	GO:0062023	collagen-containing extracellular matrix	11/49	332/19659	4.44157e-10	6.53587e-08	4.78801e-08	1301/1278/1281/1282/1293/2335/2817/3490/4060/10631/7058	11
Black	CC	GO:0098644	complex of collagen trimers	5/49	19/19659	8.83225e-10	6.53587e-08	4.78801e-08	1301/1278/1281/1282/4060	5
Black	CC	GO:0031012	extracellular matrix	12/49	490/19659	2.0081e-09	9.90664e-08	7.25735e-08	1301/1278/1281/1282/1293/2335/2817/3490/4060/5359/10631/7058	12
Black	CC	GO:0005583	fibrillar collagen trimer	4/49	11/19659	1.10948e-08	3.28407e-07	2.40583e-07	1301/1278/1281/4060	4
Black	CC	GO:0098643	banded collagen fibril	4/49	11/19659	1.10948e-08	3.28407e-07	2.40583e-07	1301/1278/1281/4060	4
Black	CC	GO:0005581	collagen trimer	6/49	87/19659	7.57093e-08	1.8675e-06	1.36808e-06	1301/1278/1281/1282/1293/4060	6
Black	CC	GO:0044420	extracellular matrix component	5/49	49/19659	1.36952e-07	2.89556e-06	2.12121e-06	1301/1278/1281/1282/4060	5
Black	CC	GO:0005788	endoplasmic reticulum lumen	8/49	301/19659	7.19639e-07	1.33133e-05	9.753e-06	1301/1278/1281/1282/1293/2335/3490/6696	8
Black	CC	GO:0005802	trans-Golgi network	5/49	225/19659	0.000237704	0.00390891	0.00286357	10133/10631/5587/11031/55062	5
Black	CC	GO:0005776	autophagosome	3/49	89/19659	0.00142156	0.0186901	0.0136919	10133/5587/55062	3
Black	CC	GO:0031528	microvillus membrane	2/49	23/19659	0.00148913	0.0186901	0.0136919	3685/4478	2
Black	CC	GO:0031091	platelet alpha granule	3/49	91/19659	0.00151541	0.0186901	0.0136919	2335/5175/7058	3
Black	CC	GO:0000421	autophagosome membrane	2/49	32/19659	0.00287795	0.0316313	0.0231723	5587/55062	2
Black	CC	GO:0005925	focal adhesion	5/49	402/19659	0.00317646	0.0316313	0.0231723	3685/4478/8021/23022/6251	5
Black	CC	GO:0005924	cell-substrate adherens junction	5/49	405/19659	0.00327907	0.0316313	0.0231723	3685/4478/8021/23022/6251	5
Black	CC	GO:0030055	cell-substrate junction	5/49	409/19659	0.0034196	0.0316313	0.0231723	3685/4478/8021/23022/6251	5
Black	MF	GO:0005201	extracellular matrix structural constituent	10/47	155/17632	8.05764e-12	1.60347e-09	1.31467e-09	1301/1278/1281/1282/1293/2335/3490/4060/10631/7058	10
Black	MF	GO:0030020	extracellular matrix structural constituent conferring tensile strength	5/47	37/17632	4.42072e-08	4.39862e-06	3.60638e-06	1301/1278/1281/1282/1293	5
Black	MF	GO:0019838	growth factor binding	6/47	137/17632	1.62926e-06	0.000108075	8.86091e-05	1278/1281/1282/2817/3490/3685	6
Black	MF	GO:0048407	platelet-derived growth factor binding	3/47	11/17632	2.88545e-06	0.000143551	0.000117696	1278/1281/1282	3
Black	MF	GO:0050840	extracellular matrix binding	4/47	56/17632	1.47027e-05	0.000585169	0.000479773	1301/2817/3685/6696	4
Black	MF	GO:0002020	protease binding	5/47	125/17632	1.99712e-05	0.000662379	0.000543077	1278/1281/2335/3329/3685	5
Black	MF	GO:0030674	protein binding, bridging	5/47	168/17632	8.2115e-05	0.00233441	0.00191396	1123/1301/1278/10133/8935	5
Black	MF	GO:0060090	molecular adaptor activity	5/47	196/17632	0.000169352	0.00421263	0.00345389	1123/1301/1278/10133/8935	5
Black	MF	GO:0008201	heparin binding	4/47	163/17632	0.000921316	0.0203713	0.0167022	1301/2335/10631/7058	4
Black	MF	GO:0017134	fibroblast growth factor binding	2/47	23/17632	0.00169782	0.0316821	0.0259758	2817/3685	2
Black	MF	GO:0050839	cell adhesion molecule binding	6/47	486/17632	0.00175127	0.0316821	0.0259758	1281/2335/2801/3685/4478/10631	6
Black	MF	GO:0005520	insulin-like growth factor binding	2/47	28/17632	0.00251524	0.0417111	0.0341984	3490/3685	2
Black	MF	GO:0005539	glycosaminoglycan binding	4/47	222/17632	0.00285554	0.0437117	0.0358388	1301/2335/10631/7058	4

## Sheet: KEGG Enriched Terms
Module	Term	ID	Description	GeneRatio	BgRatio	pvalue	p.adjust	qvalue	geneID	Count
Blue	hsa04932	hsa04932	Non-alcoholic fatty liver disease (NAFLD)	17/149	149/7893	2.23434e-09	2.54449e-07	2.30519e-07	1337/1345/1349/1350/1351/1537/54205/3725/4697/4702/4708/4710/4711/4729/5313/7381/27089	17
Blue	hsa05010	hsa05010	Alzheimer disease	18/149	171/7893	2.7201e-09	2.54449e-07	2.30519e-07	1337/1345/1349/1350/1351/1537/54205/2597/4697/4702/4708/4710/4711/4729/5330/5530/7381/27089	18
Blue	hsa00190	hsa00190	Oxidative phosphorylation	16/149	133/7893	3.12848e-09	2.54449e-07	2.30519e-07	51606/1337/1345/1349/1350/1351/1537/4697/4702/4708/4710/4711/4729/27068/7381/27089	16
Blue	hsa05012	hsa05012	Parkinson disease	15/149	142/7893	5.94545e-08	3.62673e-06	3.28565e-06	1337/1345/1349/1350/1351/1537/54205/4697/4702/4708/4710/4711/4729/7381/27089	15
Blue	hsa05016	hsa05016	Huntington disease	17/149	193/7893	1.11777e-07	5.45472e-06	4.94172e-06	1337/1345/1349/1350/1351/1537/54205/55081/4697/4702/4708/4710/4711/4729/5330/7381/27089	17
Blue	hsa01200	hsa01200	Carbon metabolism	12/149	117/7893	1.83559e-06	7.46473e-05	6.7627e-05	35/50/1892/2597/2806/26275/4191/5096/26227/5313/8802/8801	12
Blue	hsa04714	hsa04714	Thermogenesis	15/149	231/7893	2.81255e-05	0.000964242	0.000873558	1337/1345/1349/1350/1351/1537/4697/4702/25915/4708/4710/4711/4729/7381/27089	15
Blue	hsa04260	hsa04260	Cardiac muscle contraction	9/149	86/7893	3.18882e-05	0.000964242	0.000873558	784/1337/1345/1349/1350/1351/1537/7381/27089	9
Blue	hsa00640	hsa00640	Propanoate metabolism	6/149	34/7893	3.55663e-05	0.000964242	0.000873558	35/1892/26275/5096/8802/8801	6
Blue	hsa04141	hsa04141	Protein processing in endoplasmic reticulum	11/149	165/7893	0.000273199	0.00666606	0.00603914	1603/79139/51009/3326/3309/10130/23645/5886/6185/51128/7991	11
Blue	hsa03060	hsa03060	Protein export	4/149	23/7893	0.000816626	0.0181142	0.0164107	3309/5018/28972/58477	4
Blue	hsa00280	hsa00280	Valine, leucine and isoleucine degradation	5/149	48/7893	0.00199655	0.0374736	0.0339494	35/501/1892/26275/5096	5
Blue	hsa00520	hsa00520	Amino sugar and nucleotide sugar metabolism	5/149	48/7893	0.00199655	0.0374736	0.0339494	2673/2762/4351/54187/7358	5
Blue	hsa00020	hsa00020	Citrate cycle (TCA cycle)	4/149	30/7893	0.00228124	0.0397588	0.0360196	50/4191/8802/8801	4
Blue	hsa01230	hsa01230	Biosynthesis of amino acids	6/149	75/7893	0.00282339	0.0459271	0.0416078	50/384/2597/2806/26227/5313	6
Blue	hsa00410	hsa00410	beta-Alanine metabolism	4/149	33/7893	0.00326035	0.0497204	0.0450443	35/501/1892/26275	4
Brown	hsa00860	hsa00860	Porphyrin and chlorophyll metabolism	6/95	42/7893	9.59163e-06	0.00152507	0.00144379	210/212/2235/3145/5498/7389	6
Brown	hsa04145	hsa04145	Phagosome	9/95	152/7893	8.23461e-05	0.00654651	0.00619762	155066/11151/1535/2215/4353/653361/4689/7037/7277	9
Brown	hsa05144	hsa05144	Malaria	5/95	49/7893	0.000285075	0.015109	0.0143038	2993/2994/2995/3043/3683	5
Brown	hsa04380	hsa04380	Osteoclast differentiation	7/95	128/7893	0.000847215	0.0323203	0.0305978	1535/2215/11027/11026/10288/653361/4689	7
Brown	hsa00910	hsa00910	Nitrogen metabolism	3/95	17/7893	0.00101636	0.0323203	0.0305978	759/760/2746	3
Green	hsa04110	hsa04110	Cell cycle	6/23	124/7893	1.08019e-06	4.64482e-05	3.86594e-05	9133/991/9700/4174/9232/7272	6
Green	hsa00240	hsa00240	Pyrimidine metabolism	4/23	57/7893	1.95411e-05	0.000395702	0.000329348	1633/5167/6241/7298	4
Green	hsa04114	hsa04114	Oocyte meiosis	5/23	128/7893	2.76071e-05	0.000395702	0.000329348	6790/9133/991/9700/9232	5
Green	hsa05166	hsa05166	Human T-cell leukemia virus 1 infection	4/23	219/7893	0.00337193	0.0362482	0.0301699	9133/991/9700/9232	4
Green	hsa03030	hsa03030	DNA replication	2/23	36/7893	0.00481833	0.0414377	0.0344891	2237/4174	2
Green	hsa00230	hsa00230	Purine metabolism	3/23	130/7893	0.0060763	0.0435468	0.0362446	1633/5167/6241	3
Turquoise	hsa04662	hsa04662	B cell receptor signaling pathway	12/312	82/7893	8.11412e-05	0.0228818	0.0200718	695/930/974/27071/8517/3635/10859/5293/5336/5579/5880/10451	12
Turquoise	hsa04062	hsa04062	Chemokine signaling pathway	19/312	189/7893	0.000162402	0.0228987	0.0200866	6352/729230/1524/2919/6387/2268/2869/8517/3702/5197/5293/5579/5590/5747/5880/10235/6777/10451/7454	19
Turquoise	hsa05134	hsa05134	Legionellosis	9/312	56/7893	0.000308507	0.0289997	0.0254383	317/664/834/2919/3606/3684/3689/7099/7124	9
Turquoise	hsa04061	hsa04061	Viral protein interaction with cytokine and cytokine receptor	12/312	100/7893	0.000544527	0.0306742	0.0269072	6352/729230/1524/2919/6387/3586/3587/3606/3560/4055/5197/7124	12
Turquoise	hsa05144	hsa05144	Malaria	8/312	49/7893	0.000596255	0.0306742	0.0269072	948/3586/3606/3689/3820/7060/7099/7124	8
Turquoise	hsa04064	hsa04064	NF-kappa B signaling pathway	12/312	102/7893	0.000652643	0.0306742	0.0269072	695/2919/6387/8517/3929/4055/5336/5579/5588/7099/7124/7128	12
Turquoise	hsa05135	hsa05135	Yersinia infection	13/312	121/7893	0.000940166	0.0363166	0.0318567	834/8517/3586/3606/5293/8395/5747/5880/7099/7124/10451/7454/7456	13
Turquoise	hsa04610	hsa04610	Complement and coagulation cascades	10/312	79/7893	0.00103026	0.0363166	0.0318567	717/727/728/729/2162/3684/3689/5329/5055/5345	10
Turquoise	hsa04664	hsa04664	Fc epsilon RI signaling pathway	9/312	68/7893	0.00132455	0.0384639	0.0337403	241/695/2207/3635/5293/5336/5880/7124/10451	9
Turquoise	hsa04640	hsa04640	Hematopoietic cell lineage	11/312	97/7893	0.00147497	0.0384639	0.0337403	930/914/948/952/925/2057/2811/3575/3684/3815/7124	11
Turquoise	hsa04670	hsa04670	Leukocyte transendothelial migration	12/312	112/7893	0.00150037	0.0384639	0.0337403	5010/6387/1536/3684/3689/3702/5293/5336/5579/5747/5880/10451	12
Turquoise	hsa04650	hsa04650	Natural killer cell mediated cytotoxicity	13/312	131/7893	0.00195429	0.0459259	0.0402859	919/962/2207/3002/3689/5293/5336/5551/5579/5880/4068/7124/10451	13
Yellow	hsa04514	hsa04514	Cell adhesion molecules (CAMs)	6/37	146/7893	5.23552e-05	0.00492139	0.0040782	965/3105/3133/3676/5788/7412	6
Yellow	hsa05170	hsa05170	Human immunodeficiency virus 1 infection	6/37	212/7893	0.000405266	0.0190475	0.015784	9582/60489/7852/3105/3133/7133	6
Yellow	hsa04670	hsa04670	Leukocyte transendothelial migration	4/37	112/7893	0.00176878	0.0420572	0.0348515	7852/3676/4688/7412	4
Yellow	hsa05169	hsa05169	Epstein-Barr virus infection	5/37	201/7893	0.00228843	0.0420572	0.0348515	965/953/3105/3133/6850	5
Yellow	hsa05416	hsa05416	Viral myocarditis	3/37	60/7893	0.00270037	0.0420572	0.0348515	2534/3105/3133	3
Yellow	hsa04380	hsa04380	Osteoclast differentiation	4/37	128/7893	0.00288027	0.0420572	0.0348515	2534/11025/4688/6850	4
Yellow	hsa04650	hsa04650	Natural killer cell mediated cytotoxicity	4/37	131/7893	0.00313192	0.0420572	0.0348515	2534/3105/3133/6850	4
Black	hsa04512	hsa04512	ECM-receptor interaction	7/30	88/7893	2.78061e-08	2.44694e-06	2.16595e-06	1278/1282/1293/2335/3685/6696/7058	7
Black	hsa04510	hsa04510	Focal adhesion	7/30	199/7893	7.24965e-06	0.000250404	0.00022165	1278/1282/1293/2335/3685/6696/7058	7
Black	hsa05205	hsa05205	Proteoglycans in cancer	7/30	204/7893	8.53651e-06	0.000250404	0.00022165	1026/1278/2335/2817/3685/4060/4478	7
Black	hsa05165	hsa05165	Human papillomavirus infection	8/30	330/7893	2.2393e-05	0.000449093	0.000397522	1026/1278/1282/1293/2335/3685/6696/7058	8
Black	hsa04974	hsa04974	Protein digestion and absorption	5/30	95/7893	2.55166e-05	0.000449093	0.000397522	1301/1278/1281/1282/1293	5
Black	hsa04151	hsa04151	PI3K-Akt signaling pathway	8/30	354/7893	3.71513e-05	0.000544886	0.000482315	1026/1278/1282/1293/2335/3685/6696/7058	8
Black	hsa05222	hsa05222	Small cell lung cancer	4/30	93/7893	0.000391504	0.00492176	0.00435658	1026/1282/2335/3685	4
Black	hsa04933	hsa04933	AGE-RAGE signaling pathway in diabetic complications	4/30	100/7893	0.000516173	0.00544086	0.00481608	1278/1281/1282/2335	4
Black	hsa05146	hsa05146	Amoebiasis	4/30	102/7893	0.000556452	0.00544086	0.00481608	1278/1281/1282/2335	4
